# Supplementary material for: Enhancing fish Underwater Visual Census to move forward assessment of fish assemblages: An application in three Mediterranean Marine Protected Areas
Source: PLoS One. 2017 Jun 8;12(6):e0178511. doi: 10.1371/journal.pone.0178511 (PMC5464568; doi:10.1371/journal.pone.0178511)
Supplement: S1 Database — (XLSX) [file pone.0178511.s005.xlsx]

## Sheet: function_sp_mean
	SP_Fish	SP	Fish	Function	Fish_n	Function_n	Region	Protection	Site	C	Density_CB	Biomass_CB	ID	Density_CBA	Biomass_CBA
1	Anth_anth_(sub-)adult_of_NB_taxa	Anth_anth	(sub-)adult_of_NB_taxa	PLA_SC	3	2	Sardinia	OUT	1	0	0	0	Sardinia_OUT_1_0_Anth_anth	0	0
2	Anth_anth_(sub-)adult_of_NB_taxa	Anth_anth	(sub-)adult_of_NB_taxa	PLA_SC	3	2	Spain	OUT	2	0	0.082	0.702826	Spain_OUT_2_0_Anth_anth	0.082	0.702826
3	Anth_anth_(sub-)adult_of_NB_taxa	Anth_anth	(sub-)adult_of_NB_taxa	PLA_SC	3	2	Corse2	IN	2	0	0	0	Corse2_IN_2_0_Anth_anth	0	0
4	Anth_anth_(sub-)adult_of_NB_taxa	Anth_anth	(sub-)adult_of_NB_taxa	PLA_SC	3	2	Sardinia	OUT	2	0	0	0	Sardinia_OUT_2_0_Anth_anth	0	0
5	Anth_anth_(sub-)adult_of_NB_taxa	Anth_anth	(sub-)adult_of_NB_taxa	PLA_SC	3	2	Corse2	OUT	3	0	0	0	Corse2_OUT_3_0_Anth_anth	0	0
6	Anth_anth_(sub-)adult_of_NB_taxa	Anth_anth	(sub-)adult_of_NB_taxa	PLA_SC	3	2	Spain	OUT	4	0	0.004	0.0540866	Spain_OUT_4_0_Anth_anth	0.004	0.0540866
7	Anth_anth_(sub-)adult_of_NB_taxa	Anth_anth	(sub-)adult_of_NB_taxa	PLA_SC	3	2	Corse2	OUT	1	0	0.024	0.488872	Corse2_OUT_1_0_Anth_anth	0.024	0.488872
8	Anth_anth_(sub-)adult_of_NB_taxa	Anth_anth	(sub-)adult_of_NB_taxa	PLA_SC	3	2	Sardinia	OUT	4	0	0	0	Sardinia_OUT_4_0_Anth_anth	0	0
9	Anth_anth_(sub-)adult_of_NB_taxa	Anth_anth	(sub-)adult_of_NB_taxa	PLA_SC	3	2	Corse2	IN	1	0	0	0	Corse2_IN_1_0_Anth_anth	0	0
10	Anth_anth_(sub-)adult_of_NB_taxa	Anth_anth	(sub-)adult_of_NB_taxa	PLA_SC	3	2	Sardinia	IN	1	0	0	0	Sardinia_IN_1_0_Anth_anth	0	0
11	Anth_anth_(sub-)adult_of_NB_taxa	Anth_anth	(sub-)adult_of_NB_taxa	PLA_SC	3	2	Corse2	IN	3	0	0	0	Corse2_IN_3_0_Anth_anth	0	0
12	Anth_anth_(sub-)adult_of_NB_taxa	Anth_anth	(sub-)adult_of_NB_taxa	PLA_SC	3	2	Spain	IN	2	0	0	0	Spain_IN_2_0_Anth_anth	0	0
13	Anth_anth_(sub-)adult_of_NB_taxa	Anth_anth	(sub-)adult_of_NB_taxa	PLA_SC	3	2	Sardinia	IN	2	0	0	0	Sardinia_IN_2_0_Anth_anth	0	0
14	Anth_anth_(sub-)adult_of_NB_taxa	Anth_anth	(sub-)adult_of_NB_taxa	PLA_SC	3	2	Corse2	OUT	4	0	0	0	Corse2_OUT_4_0_Anth_anth	0	0
15	Anth_anth_(sub-)adult_of_NB_taxa	Anth_anth	(sub-)adult_of_NB_taxa	PLA_SC	3	2	Spain	IN	4	0	0	0	Spain_IN_4_0_Anth_anth	0	0
16	Anth_anth_(sub-)adult_of_NB_taxa	Anth_anth	(sub-)adult_of_NB_taxa	PLA_SC	3	2	Spain	OUT	3	0	0	0	Spain_OUT_3_0_Anth_anth	0	0
17	Anth_anth_(sub-)adult_of_NB_taxa	Anth_anth	(sub-)adult_of_NB_taxa	PLA_SC	3	2	Spain	OUT	1	0	0	0	Spain_OUT_1_0_Anth_anth	0	0
18	Anth_anth_(sub-)adult_of_NB_taxa	Anth_anth	(sub-)adult_of_NB_taxa	PLA_SC	3	2	Sardinia	IN	4	0	0	0	Sardinia_IN_4_0_Anth_anth	0	0
19	Anth_anth_(sub-)adult_of_NB_taxa	Anth_anth	(sub-)adult_of_NB_taxa	PLA_SC	3	2	Spain	IN	3	0	0.008	0.181219	Spain_IN_3_0_Anth_anth	0.008	0.181219
20	Anth_anth_(sub-)adult_of_NB_taxa	Anth_anth	(sub-)adult_of_NB_taxa	PLA_SC	3	2	Sardinia	OUT	3	0	0	0	Sardinia_OUT_3_0_Anth_anth	0	0
21	Anth_anth_(sub-)adult_of_NB_taxa	Anth_anth	(sub-)adult_of_NB_taxa	PLA_SC	3	2	Spain	IN	1	0	0	0	Spain_IN_1_0_Anth_anth	0	0
22	Anth_anth_(sub-)adult_of_NB_taxa	Anth_anth	(sub-)adult_of_NB_taxa	PLA_SC	3	2	Sardinia	IN	3	0	0	0	Sardinia_IN_3_0_Anth_anth	0	0
23	Anth_anth_(sub-)adult_of_NB_taxa	Anth_anth	(sub-)adult_of_NB_taxa	PLA_SC	3	2	Corse2	IN	4	0	0	0	Corse2_IN_4_0_Anth_anth	0	0
24	Anth_anth_(sub-)adult_of_NB_taxa	Anth_anth	(sub-)adult_of_NB_taxa	PLA_SC	3	2	Corse2	OUT	2	0	0.03	0.215723	Corse2_OUT_2_0_Anth_anth	0.03	0.215723
25	Apog_imbe_(sub-)adult_of_NB_taxa	Apog_imbe	(sub-)adult_of_NB_taxa	PLA_SC	3	2	Spain	OUT	2	0	0.03	0.386475	Spain_OUT_2_0_Apog_imbe	0.03	0.386475
26	Apog_imbe_(sub-)adult_of_NB_taxa	Apog_imbe	(sub-)adult_of_NB_taxa	PLA_SC	3	2	Sardinia	OUT	2	0	0	0	Sardinia_OUT_2_0_Apog_imbe	0	0
27	Apog_imbe_(sub-)adult_of_NB_taxa	Apog_imbe	(sub-)adult_of_NB_taxa	PLA_SC	3	2	Spain	OUT	4	0	0.014	0.128782	Spain_OUT_4_0_Apog_imbe	0.014	0.128782
28	Apog_imbe_(sub-)adult_of_NB_taxa	Apog_imbe	(sub-)adult_of_NB_taxa	PLA_SC	3	2	Spain	IN	3	0	0.086	1.08211	Spain_IN_3_0_Apog_imbe	0.086	1.08211
29	Apog_imbe_(sub-)adult_of_NB_taxa	Apog_imbe	(sub-)adult_of_NB_taxa	PLA_SC	3	2	Corse2	OUT	3	0	0.006	0.077295	Corse2_OUT_3_0_Apog_imbe	0.006	0.077295
30	Apog_imbe_(sub-)adult_of_NB_taxa	Apog_imbe	(sub-)adult_of_NB_taxa	PLA_SC	3	2	Sardinia	OUT	4	0	0.002	0.0128718	Sardinia_OUT_4_0_Apog_imbe	0.002	0.0128718
31	Apog_imbe_(sub-)adult_of_NB_taxa	Apog_imbe	(sub-)adult_of_NB_taxa	PLA_SC	3	2	Sardinia	IN	2	0	0	0	Sardinia_IN_2_0_Apog_imbe	0	0
32	Apog_imbe_(sub-)adult_of_NB_taxa	Apog_imbe	(sub-)adult_of_NB_taxa	PLA_SC	3	2	Corse2	OUT	1	0	0.026	0.221861	Corse2_OUT_1_0_Apog_imbe	0.026	0.221861
33	Apog_imbe_(sub-)adult_of_NB_taxa	Apog_imbe	(sub-)adult_of_NB_taxa	PLA_SC	3	2	Corse2	IN	3	0	0.002	0.0128718	Corse2_IN_3_0_Apog_imbe	0.002	0.0128718
34	Apog_imbe_(sub-)adult_of_NB_taxa	Apog_imbe	(sub-)adult_of_NB_taxa	PLA_SC	3	2	Corse2	IN	1	0	0.016	0.20612	Corse2_IN_1_0_Apog_imbe	0.016	0.20612
35	Apog_imbe_(sub-)adult_of_NB_taxa	Apog_imbe	(sub-)adult_of_NB_taxa	PLA_SC	3	2	Spain	IN	2	0	0.026	0.244693	Spain_IN_2_0_Apog_imbe	0.026	0.244693
36	Apog_imbe_(sub-)adult_of_NB_taxa	Apog_imbe	(sub-)adult_of_NB_taxa	PLA_SC	3	2	Spain	OUT	1	0	0.002	0.0128718	Spain_OUT_1_0_Apog_imbe	0.002	0.0128718
37	Apog_imbe_(sub-)adult_of_NB_taxa	Apog_imbe	(sub-)adult_of_NB_taxa	PLA_SC	3	2	Corse2	IN	4	0	0.016	0.0649212	Corse2_IN_4_0_Apog_imbe	0.016	0.0649212
38	Apog_imbe_(sub-)adult_of_NB_taxa	Apog_imbe	(sub-)adult_of_NB_taxa	PLA_SC	3	2	Sardinia	OUT	1	0	0	0	Sardinia_OUT_1_0_Apog_imbe	0	0
39	Apog_imbe_(sub-)adult_of_NB_taxa	Apog_imbe	(sub-)adult_of_NB_taxa	PLA_SC	3	2	Spain	IN	4	0	0.032	0.231735	Spain_IN_4_0_Apog_imbe	0.032	0.231735
40	Apog_imbe_(sub-)adult_of_NB_taxa	Apog_imbe	(sub-)adult_of_NB_taxa	PLA_SC	3	2	Corse2	OUT	2	0	0.01	0.0643591	Corse2_OUT_2_0_Apog_imbe	0.01	0.0643591
41	Apog_imbe_(sub-)adult_of_NB_taxa	Apog_imbe	(sub-)adult_of_NB_taxa	PLA_SC	3	2	Corse2	IN	2	0	0	0	Corse2_IN_2_0_Apog_imbe	0	0
42	Apog_imbe_(sub-)adult_of_NB_taxa	Apog_imbe	(sub-)adult_of_NB_taxa	PLA_SC	3	2	Sardinia	OUT	3	0	0.002	0.025765	Sardinia_OUT_3_0_Apog_imbe	0.002	0.025765
43	Apog_imbe_(sub-)adult_of_NB_taxa	Apog_imbe	(sub-)adult_of_NB_taxa	PLA_SC	3	2	Corse2	OUT	4	0	0.008	0.0514873	Corse2_OUT_4_0_Apog_imbe	0.008	0.0514873
44	Apog_imbe_(sub-)adult_of_NB_taxa	Apog_imbe	(sub-)adult_of_NB_taxa	PLA_SC	3	2	Spain	OUT	3	0	0.046	0.286739	Spain_OUT_3_0_Apog_imbe	0.046	0.286739
45	Apog_imbe_(sub-)adult_of_NB_taxa	Apog_imbe	(sub-)adult_of_NB_taxa	PLA_SC	3	2	Spain	IN	1	0	0.042	0.327163	Spain_IN_1_0_Apog_imbe	0.042	0.327163
46	Apog_imbe_(sub-)adult_of_NB_taxa	Apog_imbe	(sub-)adult_of_NB_taxa	PLA_SC	3	2	Sardinia	IN	1	0	0.004	0.05153	Sardinia_IN_1_0_Apog_imbe	0.004	0.05153
47	Apog_imbe_(sub-)adult_of_NB_taxa	Apog_imbe	(sub-)adult_of_NB_taxa	PLA_SC	3	2	Sardinia	IN	4	0	0.018	0.103579	Sardinia_IN_4_0_Apog_imbe	0.018	0.103579
48	Apog_imbe_(sub-)adult_of_NB_taxa	Apog_imbe	(sub-)adult_of_NB_taxa	PLA_SC	3	2	Sardinia	IN	3	0	0.012	0.0315669	Sardinia_IN_3_0_Apog_imbe	0.012	0.0315669
49	Blen_inde_CB_taxa	Blen_inde	CB_taxa	CA_CB	1	3	Spain	IN	4	1	0	0	Spain_IN_4_1_Blen_inde	0	0
50	Blen_inde_CB_taxa	Blen_inde	CB_taxa	CA_CB	1	3	Spain	OUT	1	1	0	0	Spain_OUT_1_1_Blen_inde	0	0
51	Blen_inde_CB_taxa	Blen_inde	CB_taxa	CA_CB	1	3	Sardinia	IN	1	1	0	0	Sardinia_IN_1_1_Blen_inde	0	0
52	Blen_inde_CB_taxa	Blen_inde	CB_taxa	CA_CB	1	3	Corse2	IN	2	1	0	0	Corse2_IN_2_1_Blen_inde	0	0
53	Blen_inde_CB_taxa	Blen_inde	CB_taxa	CA_CB	1	3	Sardinia	IN	3	1	0	0	Sardinia_IN_3_1_Blen_inde	0	0
54	Blen_inde_CB_taxa	Blen_inde	CB_taxa	CA_CB	1	3	Sardinia	IN	4	1	0	0	Sardinia_IN_4_1_Blen_inde	0	0
55	Blen_inde_CB_taxa	Blen_inde	CB_taxa	CA_CB	1	3	Sardinia	OUT	4	1	0	0	Sardinia_OUT_4_1_Blen_inde	0	0
56	Blen_inde_CB_taxa	Blen_inde	CB_taxa	CA_CB	1	3	Corse2	IN	1	1	0	0	Corse2_IN_1_1_Blen_inde	0	0
57	Blen_inde_CB_taxa	Blen_inde	CB_taxa	CA_CB	1	3	Sardinia	OUT	1	1	0	0	Sardinia_OUT_1_1_Blen_inde	0	0
58	Blen_inde_CB_taxa	Blen_inde	CB_taxa	CA_CB	1	3	Spain	IN	2	1	0	0	Spain_IN_2_1_Blen_inde	0	0
59	Blen_inde_CB_taxa	Blen_inde	CB_taxa	CA_CB	1	3	Corse2	OUT	1	1	0	0	Corse2_OUT_1_1_Blen_inde	0	0
60	Blen_inde_CB_taxa	Blen_inde	CB_taxa	CA_CB	1	3	Spain	OUT	2	1	0	0	Spain_OUT_2_1_Blen_inde	0	0
61	Blen_inde_CB_taxa	Blen_inde	CB_taxa	CA_CB	1	3	Sardinia	OUT	3	1	0.1	0.117206	Sardinia_OUT_3_1_Blen_inde	0.1	0.117206
62	Blen_inde_CB_taxa	Blen_inde	CB_taxa	CA_CB	1	3	Corse2	OUT	4	1	0	0	Corse2_OUT_4_1_Blen_inde	0	0
63	Blen_inde_CB_taxa	Blen_inde	CB_taxa	CA_CB	1	3	Corse2	OUT	3	1	0	0	Corse2_OUT_3_1_Blen_inde	0	0
64	Blen_inde_CB_taxa	Blen_inde	CB_taxa	CA_CB	1	3	Spain	OUT	4	1	0	0	Spain_OUT_4_1_Blen_inde	0	0
65	Blen_inde_CB_taxa	Blen_inde	CB_taxa	CA_CB	1	3	Spain	IN	1	1	0	0	Spain_IN_1_1_Blen_inde	0	0
66	Blen_inde_CB_taxa	Blen_inde	CB_taxa	CA_CB	1	3	Corse2	IN	4	1	0	0	Corse2_IN_4_1_Blen_inde	0	0
67	Blen_inde_CB_taxa	Blen_inde	CB_taxa	CA_CB	1	3	Corse2	OUT	2	1	0	0	Corse2_OUT_2_1_Blen_inde	0	0
68	Blen_inde_CB_taxa	Blen_inde	CB_taxa	CA_CB	1	3	Spain	OUT	3	1	0	0	Spain_OUT_3_1_Blen_inde	0	0
69	Blen_inde_CB_taxa	Blen_inde	CB_taxa	CA_CB	1	3	Sardinia	OUT	2	1	0	0	Sardinia_OUT_2_1_Blen_inde	0	0
70	Blen_inde_CB_taxa	Blen_inde	CB_taxa	CA_CB	1	3	Spain	IN	3	1	0.075	0.179859	Spain_IN_3_1_Blen_inde	0.075	0.179859
71	Blen_inde_CB_taxa	Blen_inde	CB_taxa	CA_CB	1	3	Sardinia	IN	2	1	0	0	Sardinia_IN_2_1_Blen_inde	0	0
72	Blen_inde_CB_taxa	Blen_inde	CB_taxa	CA_CB	1	3	Corse2	IN	3	1	0	0	Corse2_IN_3_1_Blen_inde	0	0
73	Boop_boop_(sub-)adult_of_NB_taxa	Boop_boop	(sub-)adult_of_NB_taxa	PLA_SC	3	2	Spain	OUT	3	0	1.074	20.2361	Spain_OUT_3_0_Boop_boop	1.074	20.2361
74	Boop_boop_(sub-)adult_of_NB_taxa	Boop_boop	(sub-)adult_of_NB_taxa	PLA_SC	3	2	Corse2	IN	4	0	0	0	Corse2_IN_4_0_Boop_boop	0	0
75	Boop_boop_(sub-)adult_of_NB_taxa	Boop_boop	(sub-)adult_of_NB_taxa	PLA_SC	3	2	Sardinia	OUT	2	0	0	0	Sardinia_OUT_2_0_Boop_boop	0	0
76	Boop_boop_(sub-)adult_of_NB_taxa	Boop_boop	(sub-)adult_of_NB_taxa	PLA_SC	3	2	Sardinia	OUT	4	0	0	0	Sardinia_OUT_4_0_Boop_boop	0	0
77	Boop_boop_(sub-)adult_of_NB_taxa	Boop_boop	(sub-)adult_of_NB_taxa	PLA_SC	3	2	Spain	IN	4	0	0	0	Spain_IN_4_0_Boop_boop	0	0
78	Boop_boop_(sub-)adult_of_NB_taxa	Boop_boop	(sub-)adult_of_NB_taxa	PLA_SC	3	2	Spain	IN	2	0	0	0	Spain_IN_2_0_Boop_boop	0	0
79	Boop_boop_(sub-)adult_of_NB_taxa	Boop_boop	(sub-)adult_of_NB_taxa	PLA_SC	3	2	Spain	OUT	1	0	2.736	29.7374	Spain_OUT_1_0_Boop_boop	2.736	29.7374
80	Boop_boop_(sub-)adult_of_NB_taxa	Boop_boop	(sub-)adult_of_NB_taxa	PLA_SC	3	2	Spain	OUT	2	0	0	0	Spain_OUT_2_0_Boop_boop	0	0
81	Boop_boop_(sub-)adult_of_NB_taxa	Boop_boop	(sub-)adult_of_NB_taxa	PLA_SC	3	2	Spain	IN	1	0	0	0	Spain_IN_1_0_Boop_boop	0	0
82	Boop_boop_(sub-)adult_of_NB_taxa	Boop_boop	(sub-)adult_of_NB_taxa	PLA_SC	3	2	Corse2	OUT	3	0	0	0	Corse2_OUT_3_0_Boop_boop	0	0
83	Boop_boop_(sub-)adult_of_NB_taxa	Boop_boop	(sub-)adult_of_NB_taxa	PLA_SC	3	2	Corse2	IN	1	0	0	0	Corse2_IN_1_0_Boop_boop	0	0
84	Boop_boop_(sub-)adult_of_NB_taxa	Boop_boop	(sub-)adult_of_NB_taxa	PLA_SC	3	2	Spain	IN	3	0	0	0	Spain_IN_3_0_Boop_boop	0	0
85	Boop_boop_(sub-)adult_of_NB_taxa	Boop_boop	(sub-)adult_of_NB_taxa	PLA_SC	3	2	Sardinia	IN	2	0	0	0	Sardinia_IN_2_0_Boop_boop	0	0
86	Boop_boop_(sub-)adult_of_NB_taxa	Boop_boop	(sub-)adult_of_NB_taxa	PLA_SC	3	2	Corse2	OUT	2	0	0.02	0.310108	Corse2_OUT_2_0_Boop_boop	0.02	0.310108
87	Boop_boop_(sub-)adult_of_NB_taxa	Boop_boop	(sub-)adult_of_NB_taxa	PLA_SC	3	2	Spain	OUT	4	0	0.523	10.5729	Spain_OUT_4_0_Boop_boop	0.523	10.5729
88	Boop_boop_(sub-)adult_of_NB_taxa	Boop_boop	(sub-)adult_of_NB_taxa	PLA_SC	3	2	Corse2	IN	3	0	0	0	Corse2_IN_3_0_Boop_boop	0	0
89	Boop_boop_(sub-)adult_of_NB_taxa	Boop_boop	(sub-)adult_of_NB_taxa	PLA_SC	3	2	Sardinia	IN	4	0	0	0	Sardinia_IN_4_0_Boop_boop	0	0
90	Boop_boop_(sub-)adult_of_NB_taxa	Boop_boop	(sub-)adult_of_NB_taxa	PLA_SC	3	2	Sardinia	IN	3	0	0	0	Sardinia_IN_3_0_Boop_boop	0	0
91	Boop_boop_(sub-)adult_of_NB_taxa	Boop_boop	(sub-)adult_of_NB_taxa	PLA_SC	3	2	Corse2	OUT	4	0	0.174	1.51741	Corse2_OUT_4_0_Boop_boop	0.174	1.51741
92	Boop_boop_(sub-)adult_of_NB_taxa	Boop_boop	(sub-)adult_of_NB_taxa	PLA_SC	3	2	Corse2	OUT	1	0	0.3	2.06935	Corse2_OUT_1_0_Boop_boop	0.3	2.06935
93	Boop_boop_(sub-)adult_of_NB_taxa	Boop_boop	(sub-)adult_of_NB_taxa	PLA_SC	3	2	Sardinia	OUT	1	0	0	0	Sardinia_OUT_1_0_Boop_boop	0	0
94	Boop_boop_(sub-)adult_of_NB_taxa	Boop_boop	(sub-)adult_of_NB_taxa	PLA_SC	3	2	Sardinia	IN	1	0	0	0	Sardinia_IN_1_0_Boop_boop	0	0
95	Boop_boop_(sub-)adult_of_NB_taxa	Boop_boop	(sub-)adult_of_NB_taxa	PLA_SC	3	2	Corse2	IN	2	0	0	0	Corse2_IN_2_0_Boop_boop	0	0
96	Boop_boop_(sub-)adult_of_NB_taxa	Boop_boop	(sub-)adult_of_NB_taxa	PLA_SC	3	2	Sardinia	OUT	3	0	0	0	Sardinia_OUT_3_0_Boop_boop	0	0
97	Chro_chro_(sub-)adult_of_NB_taxa	Chro_chro	(sub-)adult_of_NB_taxa	PLA_SC	3	2	Sardinia	OUT	4	0	0.56	4.89179	Sardinia_OUT_4_0_Chro_chro	0.56	4.89179
98	Chro_chro_(sub-)adult_of_NB_taxa	Chro_chro	(sub-)adult_of_NB_taxa	PLA_SC	3	2	Corse2	OUT	1	0	1.031	7.76235	Corse2_OUT_1_0_Chro_chro	1.031	7.76235
99	Chro_chro_(sub-)adult_of_NB_taxa	Chro_chro	(sub-)adult_of_NB_taxa	PLA_SC	3	2	Sardinia	OUT	1	0	0.3	2.79751	Sardinia_OUT_1_0_Chro_chro	0.3	2.79751
100	Chro_chro_(sub-)adult_of_NB_taxa	Chro_chro	(sub-)adult_of_NB_taxa	PLA_SC	3	2	Spain	IN	2	0	2.131	13.9832	Spain_IN_2_0_Chro_chro	2.131	13.9832
101	Chro_chro_(sub-)adult_of_NB_taxa	Chro_chro	(sub-)adult_of_NB_taxa	PLA_SC	3	2	Spain	OUT	2	0	0.905	2.44603	Spain_OUT_2_0_Chro_chro	0.905	2.44603
102	Chro_chro_(sub-)adult_of_NB_taxa	Chro_chro	(sub-)adult_of_NB_taxa	PLA_SC	3	2	Spain	OUT	3	0	0.715	3.31891	Spain_OUT_3_0_Chro_chro	0.715	3.31891
103	Chro_chro_(sub-)adult_of_NB_taxa	Chro_chro	(sub-)adult_of_NB_taxa	PLA_SC	3	2	Sardinia	OUT	2	0	0.52	6.09599	Sardinia_OUT_2_0_Chro_chro	0.52	6.09599
104	Chro_chro_(sub-)adult_of_NB_taxa	Chro_chro	(sub-)adult_of_NB_taxa	PLA_SC	3	2	Sardinia	IN	4	0	0.442	4.64664	Sardinia_IN_4_0_Chro_chro	0.442	4.64664
105	Chro_chro_(sub-)adult_of_NB_taxa	Chro_chro	(sub-)adult_of_NB_taxa	PLA_SC	3	2	Corse2	OUT	2	0	0.411	4.5312	Corse2_OUT_2_0_Chro_chro	0.411	4.5312
106	Chro_chro_(sub-)adult_of_NB_taxa	Chro_chro	(sub-)adult_of_NB_taxa	PLA_SC	3	2	Corse2	IN	4	0	0.282	3.82438	Corse2_IN_4_0_Chro_chro	0.282	3.82438
107	Chro_chro_(sub-)adult_of_NB_taxa	Chro_chro	(sub-)adult_of_NB_taxa	PLA_SC	3	2	Sardinia	IN	2	0	0.718	5.64609	Sardinia_IN_2_0_Chro_chro	0.718	5.64609
108	Chro_chro_(sub-)adult_of_NB_taxa	Chro_chro	(sub-)adult_of_NB_taxa	PLA_SC	3	2	Sardinia	IN	3	0	0.66	5.8698	Sardinia_IN_3_0_Chro_chro	0.66	5.8698
109	Chro_chro_(sub-)adult_of_NB_taxa	Chro_chro	(sub-)adult_of_NB_taxa	PLA_SC	3	2	Spain	IN	4	0	1.66	9.64712	Spain_IN_4_0_Chro_chro	1.66	9.64712
110	Chro_chro_(sub-)adult_of_NB_taxa	Chro_chro	(sub-)adult_of_NB_taxa	PLA_SC	3	2	Corse2	IN	2	0	0.603	6.1425	Corse2_IN_2_0_Chro_chro	0.603	6.1425
111	Chro_chro_(sub-)adult_of_NB_taxa	Chro_chro	(sub-)adult_of_NB_taxa	PLA_SC	3	2	Spain	OUT	1	0	1.316	7.89617	Spain_OUT_1_0_Chro_chro	1.316	7.89617
112	Chro_chro_(sub-)adult_of_NB_taxa	Chro_chro	(sub-)adult_of_NB_taxa	PLA_SC	3	2	Corse2	IN	1	0	1.201	15.128	Corse2_IN_1_0_Chro_chro	1.201	15.128
113	Chro_chro_(sub-)adult_of_NB_taxa	Chro_chro	(sub-)adult_of_NB_taxa	PLA_SC	3	2	Sardinia	OUT	3	0	0.778	6.60353	Sardinia_OUT_3_0_Chro_chro	0.778	6.60353
114	Chro_chro_(sub-)adult_of_NB_taxa	Chro_chro	(sub-)adult_of_NB_taxa	PLA_SC	3	2	Spain	IN	3	0	1.525	10.6939	Spain_IN_3_0_Chro_chro	1.525	10.6939
115	Chro_chro_(sub-)adult_of_NB_taxa	Chro_chro	(sub-)adult_of_NB_taxa	PLA_SC	3	2	Corse2	IN	3	0	0.602	8.56666	Corse2_IN_3_0_Chro_chro	0.602	8.56666
116	Chro_chro_(sub-)adult_of_NB_taxa	Chro_chro	(sub-)adult_of_NB_taxa	PLA_SC	3	2	Corse2	OUT	4	0	0.98	13.9169	Corse2_OUT_4_0_Chro_chro	0.98	13.9169
117	Chro_chro_(sub-)adult_of_NB_taxa	Chro_chro	(sub-)adult_of_NB_taxa	PLA_SC	3	2	Spain	OUT	4	0	1.742	7.74488	Spain_OUT_4_0_Chro_chro	1.742	7.74488
118	Chro_chro_(sub-)adult_of_NB_taxa	Chro_chro	(sub-)adult_of_NB_taxa	PLA_SC	3	2	Corse2	OUT	3	0	1.37	23.062	Corse2_OUT_3_0_Chro_chro	1.37	23.062
119	Chro_chro_(sub-)adult_of_NB_taxa	Chro_chro	(sub-)adult_of_NB_taxa	PLA_SC	3	2	Sardinia	IN	1	0	1.534	8.6588	Sardinia_IN_1_0_Chro_chro	1.534	8.6588
120	Chro_chro_(sub-)adult_of_NB_taxa	Chro_chro	(sub-)adult_of_NB_taxa	PLA_SC	3	2	Spain	IN	1	0	0.776	6.06438	Spain_IN_1_0_Chro_chro	0.776	6.06438
121	Chro_chro_CB_juvenile_of_NB_taxa	Chro_chro	CB_juvenile_of_NB_taxa	CA_CB	2	3	Spain	OUT	2	1	0.175	0.0355633	Spain_OUT_2_1_Chro_chro	0.175	0.0355633
122	Chro_chro_CB_juvenile_of_NB_taxa	Chro_chro	CB_juvenile_of_NB_taxa	CA_CB	2	3	Sardinia	IN	3	1	0.55	0.227008	Sardinia_IN_3_1_Chro_chro	0.55	0.227008
123	Chro_chro_CB_juvenile_of_NB_taxa	Chro_chro	CB_juvenile_of_NB_taxa	CA_CB	2	3	Spain	IN	2	1	0.275	0.129218	Spain_IN_2_1_Chro_chro	0.275	0.129218
124	Chro_chro_CB_juvenile_of_NB_taxa	Chro_chro	CB_juvenile_of_NB_taxa	CA_CB	2	3	Sardinia	IN	4	1	1.25	0.254024	Sardinia_IN_4_1_Chro_chro	1.25	0.254024
125	Chro_chro_CB_juvenile_of_NB_taxa	Chro_chro	CB_juvenile_of_NB_taxa	CA_CB	2	3	Corse2	OUT	1	1	0	0	Corse2_OUT_1_1_Chro_chro	0	0
126	Chro_chro_CB_juvenile_of_NB_taxa	Chro_chro	CB_juvenile_of_NB_taxa	CA_CB	2	3	Spain	IN	3	1	0.25	0.14509	Spain_IN_3_1_Chro_chro	0.25	0.14509
127	Chro_chro_CB_juvenile_of_NB_taxa	Chro_chro	CB_juvenile_of_NB_taxa	CA_CB	2	3	Sardinia	IN	2	1	0.5	0.101609	Sardinia_IN_2_1_Chro_chro	0.5	0.101609
128	Chro_chro_CB_juvenile_of_NB_taxa	Chro_chro	CB_juvenile_of_NB_taxa	CA_CB	2	3	Corse2	IN	2	1	0.1	0.0203219	Corse2_IN_2_1_Chro_chro	0.1	0.0203219
129	Chro_chro_CB_juvenile_of_NB_taxa	Chro_chro	CB_juvenile_of_NB_taxa	CA_CB	2	3	Corse2	IN	1	1	0	0	Corse2_IN_1_1_Chro_chro	0	0
130	Chro_chro_CB_juvenile_of_NB_taxa	Chro_chro	CB_juvenile_of_NB_taxa	CA_CB	2	3	Corse2	OUT	2	1	0	0	Corse2_OUT_2_1_Chro_chro	0	0
131	Chro_chro_CB_juvenile_of_NB_taxa	Chro_chro	CB_juvenile_of_NB_taxa	CA_CB	2	3	Spain	OUT	4	1	0	0	Spain_OUT_4_1_Chro_chro	0	0
132	Chro_chro_CB_juvenile_of_NB_taxa	Chro_chro	CB_juvenile_of_NB_taxa	CA_CB	2	3	Corse2	IN	4	1	0.1	0.0203219	Corse2_IN_4_1_Chro_chro	0.1	0.0203219
133	Chro_chro_CB_juvenile_of_NB_taxa	Chro_chro	CB_juvenile_of_NB_taxa	CA_CB	2	3	Sardinia	IN	1	1	0.75	0.152414	Sardinia_IN_1_1_Chro_chro	0.75	0.152414
134	Chro_chro_CB_juvenile_of_NB_taxa	Chro_chro	CB_juvenile_of_NB_taxa	CA_CB	2	3	Sardinia	OUT	2	1	0	0	Sardinia_OUT_2_1_Chro_chro	0	0
135	Chro_chro_CB_juvenile_of_NB_taxa	Chro_chro	CB_juvenile_of_NB_taxa	CA_CB	2	3	Sardinia	OUT	1	1	0	0	Sardinia_OUT_1_1_Chro_chro	0	0
136	Chro_chro_CB_juvenile_of_NB_taxa	Chro_chro	CB_juvenile_of_NB_taxa	CA_CB	2	3	Spain	OUT	3	1	0.1	0.0203219	Spain_OUT_3_1_Chro_chro	0.1	0.0203219
137	Chro_chro_CB_juvenile_of_NB_taxa	Chro_chro	CB_juvenile_of_NB_taxa	CA_CB	2	3	Spain	OUT	1	1	0	0	Spain_OUT_1_1_Chro_chro	0	0
138	Chro_chro_CB_juvenile_of_NB_taxa	Chro_chro	CB_juvenile_of_NB_taxa	CA_CB	2	3	Corse2	IN	3	1	0.75	0.152414	Corse2_IN_3_1_Chro_chro	0.75	0.152414
139	Chro_chro_CB_juvenile_of_NB_taxa	Chro_chro	CB_juvenile_of_NB_taxa	CA_CB	2	3	Corse2	OUT	4	1	0.1	0.0203219	Corse2_OUT_4_1_Chro_chro	0.1	0.0203219
140	Chro_chro_CB_juvenile_of_NB_taxa	Chro_chro	CB_juvenile_of_NB_taxa	CA_CB	2	3	Spain	IN	1	1	0.25	0.14509	Spain_IN_1_1_Chro_chro	0.25	0.14509
141	Chro_chro_CB_juvenile_of_NB_taxa	Chro_chro	CB_juvenile_of_NB_taxa	CA_CB	2	3	Sardinia	OUT	3	1	0	0	Sardinia_OUT_3_1_Chro_chro	0	0
142	Chro_chro_CB_juvenile_of_NB_taxa	Chro_chro	CB_juvenile_of_NB_taxa	CA_CB	2	3	Corse2	OUT	3	1	4.125	0.838278	Corse2_OUT_3_1_Chro_chro	4.125	0.838278
143	Chro_chro_CB_juvenile_of_NB_taxa	Chro_chro	CB_juvenile_of_NB_taxa	CA_CB	2	3	Spain	IN	4	1	0.4	0.207002	Spain_IN_4_1_Chro_chro	0.4	0.207002
144	Chro_chro_CB_juvenile_of_NB_taxa	Chro_chro	CB_juvenile_of_NB_taxa	CA_CB	2	3	Sardinia	OUT	4	1	0	0	Sardinia_OUT_4_1_Chro_chro	0	0
145	Cori_juli_(sub-)adult_of_NB_taxa	Cori_juli	(sub-)adult_of_NB_taxa	CA_NB	3	4	Spain	OUT	4	0	0.066	0.82523	Spain_OUT_4_0_Cori_juli	0.066	0.82523
146	Cori_juli_(sub-)adult_of_NB_taxa	Cori_juli	(sub-)adult_of_NB_taxa	CA_NB	3	4	Spain	IN	2	0	0.074	0.779317	Spain_IN_2_0_Cori_juli	0.074	0.779317
147	Cori_juli_(sub-)adult_of_NB_taxa	Cori_juli	(sub-)adult_of_NB_taxa	CA_NB	3	4	Corse2	OUT	3	0	0.036	1.36265	Corse2_OUT_3_0_Cori_juli	0.036	1.36265
148	Cori_juli_(sub-)adult_of_NB_taxa	Cori_juli	(sub-)adult_of_NB_taxa	CA_NB	3	4	Spain	IN	4	0	0.098	1.62901	Spain_IN_4_0_Cori_juli	0.098	1.62901
149	Cori_juli_(sub-)adult_of_NB_taxa	Cori_juli	(sub-)adult_of_NB_taxa	CA_NB	3	4	Sardinia	OUT	2	0	0.154667	3.02798	Sardinia_OUT_2_0_Cori_juli	0.154667	3.02798
150	Cori_juli_(sub-)adult_of_NB_taxa	Cori_juli	(sub-)adult_of_NB_taxa	CA_NB	3	4	Corse2	OUT	2	0	0.04	1.71646	Corse2_OUT_2_0_Cori_juli	0.04	1.71646
151	Cori_juli_(sub-)adult_of_NB_taxa	Cori_juli	(sub-)adult_of_NB_taxa	CA_NB	3	4	Corse2	OUT	1	0	0.064	3.31417	Corse2_OUT_1_0_Cori_juli	0.064	3.31417
152	Cori_juli_(sub-)adult_of_NB_taxa	Cori_juli	(sub-)adult_of_NB_taxa	CA_NB	3	4	Spain	OUT	2	0	0.06	0.920387	Spain_OUT_2_0_Cori_juli	0.06	0.920387
153	Cori_juli_(sub-)adult_of_NB_taxa	Cori_juli	(sub-)adult_of_NB_taxa	CA_NB	3	4	Sardinia	OUT	1	0	0.156	3.84658	Sardinia_OUT_1_0_Cori_juli	0.156	3.84658
154	Cori_juli_(sub-)adult_of_NB_taxa	Cori_juli	(sub-)adult_of_NB_taxa	CA_NB	3	4	Spain	IN	1	0	0.066	1.36107	Spain_IN_1_0_Cori_juli	0.066	1.36107
155	Cori_juli_(sub-)adult_of_NB_taxa	Cori_juli	(sub-)adult_of_NB_taxa	CA_NB	3	4	Corse2	IN	1	0	0.199	8.40531	Corse2_IN_1_0_Cori_juli	0.199	8.40531
156	Cori_juli_(sub-)adult_of_NB_taxa	Cori_juli	(sub-)adult_of_NB_taxa	CA_NB	3	4	Corse2	IN	3	0	0.034	1.17461	Corse2_IN_3_0_Cori_juli	0.034	1.17461
157	Cori_juli_(sub-)adult_of_NB_taxa	Cori_juli	(sub-)adult_of_NB_taxa	CA_NB	3	4	Sardinia	OUT	3	0	0.048	0.936202	Sardinia_OUT_3_0_Cori_juli	0.048	0.936202
158	Cori_juli_(sub-)adult_of_NB_taxa	Cori_juli	(sub-)adult_of_NB_taxa	CA_NB	3	4	Sardinia	IN	1	0	0.16	3.14143	Sardinia_IN_1_0_Cori_juli	0.16	3.14143
159	Cori_juli_(sub-)adult_of_NB_taxa	Cori_juli	(sub-)adult_of_NB_taxa	CA_NB	3	4	Spain	IN	3	0	0.527	8.91383	Spain_IN_3_0_Cori_juli	0.527	8.91383
160	Cori_juli_(sub-)adult_of_NB_taxa	Cori_juli	(sub-)adult_of_NB_taxa	CA_NB	3	4	Corse2	IN	2	0	0.072	1.14008	Corse2_IN_2_0_Cori_juli	0.072	1.14008
161	Cori_juli_(sub-)adult_of_NB_taxa	Cori_juli	(sub-)adult_of_NB_taxa	CA_NB	3	4	Corse2	IN	4	0	0.056	2.0595	Corse2_IN_4_0_Cori_juli	0.056	2.0595
162	Cori_juli_(sub-)adult_of_NB_taxa	Cori_juli	(sub-)adult_of_NB_taxa	CA_NB	3	4	Sardinia	OUT	4	0	0.1	2.43824	Sardinia_OUT_4_0_Cori_juli	0.1	2.43824
163	Cori_juli_(sub-)adult_of_NB_taxa	Cori_juli	(sub-)adult_of_NB_taxa	CA_NB	3	4	Spain	OUT	3	0	0.032	0.731155	Spain_OUT_3_0_Cori_juli	0.032	0.731155
164	Cori_juli_(sub-)adult_of_NB_taxa	Cori_juli	(sub-)adult_of_NB_taxa	CA_NB	3	4	Corse2	OUT	4	0	0.036	1.33495	Corse2_OUT_4_0_Cori_juli	0.036	1.33495
165	Cori_juli_(sub-)adult_of_NB_taxa	Cori_juli	(sub-)adult_of_NB_taxa	CA_NB	3	4	Sardinia	IN	2	0	0.14	3.14461	Sardinia_IN_2_0_Cori_juli	0.14	3.14461
166	Cori_juli_(sub-)adult_of_NB_taxa	Cori_juli	(sub-)adult_of_NB_taxa	CA_NB	3	4	Sardinia	IN	3	0	0.1	2.21527	Sardinia_IN_3_0_Cori_juli	0.1	2.21527
167	Cori_juli_(sub-)adult_of_NB_taxa	Cori_juli	(sub-)adult_of_NB_taxa	CA_NB	3	4	Spain	OUT	1	0	0.074	1.07027	Spain_OUT_1_0_Cori_juli	0.074	1.07027
168	Cori_juli_(sub-)adult_of_NB_taxa	Cori_juli	(sub-)adult_of_NB_taxa	CA_NB	3	4	Sardinia	IN	4	0	0.162	2.94133	Sardinia_IN_4_0_Cori_juli	0.162	2.94133
169	Cori_juli_CB_juvenile_of_NB_taxa	Cori_juli	CB_juvenile_of_NB_taxa	CA_CB	2	3	Spain	IN	2	1	0.05	0.0236556	Spain_IN_2_1_Cori_juli	0.05	0.0236556
170	Cori_juli_CB_juvenile_of_NB_taxa	Cori_juli	CB_juvenile_of_NB_taxa	CA_CB	2	3	Sardinia	IN	4	1	0	0	Sardinia_IN_4_1_Cori_juli	0	0
171	Cori_juli_CB_juvenile_of_NB_taxa	Cori_juli	CB_juvenile_of_NB_taxa	CA_CB	2	3	Corse2	IN	3	1	0.35	0.0975014	Corse2_IN_3_1_Cori_juli	0.35	0.0975014
172	Cori_juli_CB_juvenile_of_NB_taxa	Cori_juli	CB_juvenile_of_NB_taxa	CA_CB	2	3	Corse2	OUT	4	1	0.125	0.0348809	Corse2_OUT_4_1_Cori_juli	0.125	0.0348809
173	Cori_juli_CB_juvenile_of_NB_taxa	Cori_juli	CB_juvenile_of_NB_taxa	CA_CB	2	3	Spain	IN	3	1	0	0	Spain_IN_3_1_Cori_juli	0	0
174	Cori_juli_CB_juvenile_of_NB_taxa	Cori_juli	CB_juvenile_of_NB_taxa	CA_CB	2	3	Sardinia	OUT	4	1	0.025	0.0327959	Sardinia_OUT_4_1_Cori_juli	0.025	0.0327959
175	Cori_juli_CB_juvenile_of_NB_taxa	Cori_juli	CB_juvenile_of_NB_taxa	CA_CB	2	3	Spain	OUT	2	1	0.05	0.0494753	Spain_OUT_2_1_Cori_juli	0.05	0.0494753
176	Cori_juli_CB_juvenile_of_NB_taxa	Cori_juli	CB_juvenile_of_NB_taxa	CA_CB	2	3	Corse2	OUT	1	1	0	0	Corse2_OUT_1_1_Cori_juli	0	0
177	Cori_juli_CB_juvenile_of_NB_taxa	Cori_juli	CB_juvenile_of_NB_taxa	CA_CB	2	3	Corse2	OUT	2	1	0.075	0.0209285	Corse2_OUT_2_1_Cori_juli	0.075	0.0209285
178	Cori_juli_CB_juvenile_of_NB_taxa	Cori_juli	CB_juvenile_of_NB_taxa	CA_CB	2	3	Sardinia	IN	3	1	0	0	Sardinia_IN_3_1_Cori_juli	0	0
179	Cori_juli_CB_juvenile_of_NB_taxa	Cori_juli	CB_juvenile_of_NB_taxa	CA_CB	2	3	Sardinia	OUT	1	1	0	0	Sardinia_OUT_1_1_Cori_juli	0	0
180	Cori_juli_CB_juvenile_of_NB_taxa	Cori_juli	CB_juvenile_of_NB_taxa	CA_CB	2	3	Sardinia	IN	2	1	0	0	Sardinia_IN_2_1_Cori_juli	0	0
181	Cori_juli_CB_juvenile_of_NB_taxa	Cori_juli	CB_juvenile_of_NB_taxa	CA_CB	2	3	Sardinia	OUT	3	1	0.025	0.0327959	Sardinia_OUT_3_1_Cori_juli	0.025	0.0327959
182	Cori_juli_CB_juvenile_of_NB_taxa	Cori_juli	CB_juvenile_of_NB_taxa	CA_CB	2	3	Corse2	IN	4	1	0.075	0.00612607	Corse2_IN_4_1_Cori_juli	0.075	0.00612607
183	Cori_juli_CB_juvenile_of_NB_taxa	Cori_juli	CB_juvenile_of_NB_taxa	CA_CB	2	3	Corse2	IN	2	1	0.15	0.0418571	Corse2_IN_2_1_Cori_juli	0.15	0.0418571
184	Cori_juli_CB_juvenile_of_NB_taxa	Cori_juli	CB_juvenile_of_NB_taxa	CA_CB	2	3	Sardinia	IN	1	1	0.025	0.0327959	Sardinia_IN_1_1_Cori_juli	0.025	0.0327959
185	Cori_juli_CB_juvenile_of_NB_taxa	Cori_juli	CB_juvenile_of_NB_taxa	CA_CB	2	3	Corse2	OUT	3	1	0.425	0.0984165	Corse2_OUT_3_1_Cori_juli	0.425	0.0984165
186	Cori_juli_CB_juvenile_of_NB_taxa	Cori_juli	CB_juvenile_of_NB_taxa	CA_CB	2	3	Spain	OUT	3	1	0.05	0.0333589	Spain_OUT_3_1_Cori_juli	0.05	0.0333589
187	Cori_juli_CB_juvenile_of_NB_taxa	Cori_juli	CB_juvenile_of_NB_taxa	CA_CB	2	3	Spain	OUT	1	1	0.05	0.0333589	Spain_OUT_1_1_Cori_juli	0.05	0.0333589
188	Cori_juli_CB_juvenile_of_NB_taxa	Cori_juli	CB_juvenile_of_NB_taxa	CA_CB	2	3	Spain	OUT	4	1	0.025	0.00697618	Spain_OUT_4_1_Cori_juli	0.025	0.00697618
189	Cori_juli_CB_juvenile_of_NB_taxa	Cori_juli	CB_juvenile_of_NB_taxa	CA_CB	2	3	Corse2	IN	1	1	0.025	0.0327959	Corse2_IN_1_1_Cori_juli	0.025	0.0327959
190	Cori_juli_CB_juvenile_of_NB_taxa	Cori_juli	CB_juvenile_of_NB_taxa	CA_CB	2	3	Spain	IN	4	1	0.05	0.0494753	Spain_IN_4_1_Cori_juli	0.05	0.0494753
191	Cori_juli_CB_juvenile_of_NB_taxa	Cori_juli	CB_juvenile_of_NB_taxa	CA_CB	2	3	Spain	IN	1	1	0.025	0.0166795	Spain_IN_1_1_Cori_juli	0.025	0.0166795
192	Cori_juli_CB_juvenile_of_NB_taxa	Cori_juli	CB_juvenile_of_NB_taxa	CA_CB	2	3	Sardinia	OUT	2	1	0	0	Sardinia_OUT_2_1_Cori_juli	0	0
193	Dent_dent_(sub-)adult_of_NB_taxa	Dent_dent	(sub-)adult_of_NB_taxa	TOP	3	5	Sardinia	IN	2	0	0	0	Sardinia_IN_2_0_Dent_dent	0	0
194	Dent_dent_(sub-)adult_of_NB_taxa	Dent_dent	(sub-)adult_of_NB_taxa	TOP	3	5	Sardinia	IN	1	0	0	0	Sardinia_IN_1_0_Dent_dent	0	0
195	Dent_dent_(sub-)adult_of_NB_taxa	Dent_dent	(sub-)adult_of_NB_taxa	TOP	3	5	Corse2	IN	1	0	0.118	120.945	Corse2_IN_1_0_Dent_dent	0.0358929	70.4614
196	Dent_dent_(sub-)adult_of_NB_taxa	Dent_dent	(sub-)adult_of_NB_taxa	TOP	3	5	Spain	IN	1	0	0	0	Spain_IN_1_0_Dent_dent	0.000357143	0.285197
197	Dent_dent_(sub-)adult_of_NB_taxa	Dent_dent	(sub-)adult_of_NB_taxa	TOP	3	5	Corse2	OUT	3	0	0.002	1.59711	Corse2_OUT_3_0_Dent_dent	0.00178571	3.85
198	Dent_dent_(sub-)adult_of_NB_taxa	Dent_dent	(sub-)adult_of_NB_taxa	TOP	3	5	Sardinia	OUT	1	0	0	0	Sardinia_OUT_1_0_Dent_dent	0	0
199	Dent_dent_(sub-)adult_of_NB_taxa	Dent_dent	(sub-)adult_of_NB_taxa	TOP	3	5	Spain	IN	3	0	0	0	Spain_IN_3_0_Dent_dent	0.000357143	0.285197
200	Dent_dent_(sub-)adult_of_NB_taxa	Dent_dent	(sub-)adult_of_NB_taxa	TOP	3	5	Sardinia	OUT	3	0	0	0	Sardinia_OUT_3_0_Dent_dent	0	0
201	Dent_dent_(sub-)adult_of_NB_taxa	Dent_dent	(sub-)adult_of_NB_taxa	TOP	3	5	Spain	IN	2	0	0	0	Spain_IN_2_0_Dent_dent	0	0
202	Dent_dent_(sub-)adult_of_NB_taxa	Dent_dent	(sub-)adult_of_NB_taxa	TOP	3	5	Spain	IN	4	0	0	0	Spain_IN_4_0_Dent_dent	0.00178571	3.66609
203	Dent_dent_(sub-)adult_of_NB_taxa	Dent_dent	(sub-)adult_of_NB_taxa	TOP	3	5	Corse2	IN	2	0	0	0	Corse2_IN_2_0_Dent_dent	0.00107143	2.95873
204	Dent_dent_(sub-)adult_of_NB_taxa	Dent_dent	(sub-)adult_of_NB_taxa	TOP	3	5	Spain	OUT	1	0	0	0	Spain_OUT_1_0_Dent_dent	0	0
205	Dent_dent_(sub-)adult_of_NB_taxa	Dent_dent	(sub-)adult_of_NB_taxa	TOP	3	5	Sardinia	OUT	2	0	0.00266667	0.255341	Sardinia_OUT_2_0_Dent_dent	0.00266667	0.255341
206	Dent_dent_(sub-)adult_of_NB_taxa	Dent_dent	(sub-)adult_of_NB_taxa	TOP	3	5	Sardinia	OUT	4	0	0	0	Sardinia_OUT_4_0_Dent_dent	0	0
207	Dent_dent_(sub-)adult_of_NB_taxa	Dent_dent	(sub-)adult_of_NB_taxa	TOP	3	5	Corse2	OUT	1	0	0	0	Corse2_OUT_1_0_Dent_dent	0.000714286	0.236517
208	Dent_dent_(sub-)adult_of_NB_taxa	Dent_dent	(sub-)adult_of_NB_taxa	TOP	3	5	Spain	OUT	3	0	0	0	Spain_OUT_3_0_Dent_dent	0.000357143	0.0597432
209	Dent_dent_(sub-)adult_of_NB_taxa	Dent_dent	(sub-)adult_of_NB_taxa	TOP	3	5	Spain	OUT	2	0	0	0	Spain_OUT_2_0_Dent_dent	0	0
210	Dent_dent_(sub-)adult_of_NB_taxa	Dent_dent	(sub-)adult_of_NB_taxa	TOP	3	5	Corse2	OUT	2	0	0	0	Corse2_OUT_2_0_Dent_dent	0	0
211	Dent_dent_(sub-)adult_of_NB_taxa	Dent_dent	(sub-)adult_of_NB_taxa	TOP	3	5	Corse2	IN	3	0	0	0	Corse2_IN_3_0_Dent_dent	0.000714286	0.403456
212	Dent_dent_(sub-)adult_of_NB_taxa	Dent_dent	(sub-)adult_of_NB_taxa	TOP	3	5	Corse2	IN	4	0	0.004	11.0459	Corse2_IN_4_0_Dent_dent	0.0153571	6.42395
213	Dent_dent_(sub-)adult_of_NB_taxa	Dent_dent	(sub-)adult_of_NB_taxa	TOP	3	5	Spain	OUT	4	0	0	0	Spain_OUT_4_0_Dent_dent	0	0
214	Dent_dent_(sub-)adult_of_NB_taxa	Dent_dent	(sub-)adult_of_NB_taxa	TOP	3	5	Sardinia	IN	3	0	0	0	Sardinia_IN_3_0_Dent_dent	0	0
215	Dent_dent_(sub-)adult_of_NB_taxa	Dent_dent	(sub-)adult_of_NB_taxa	TOP	3	5	Corse2	OUT	4	0	0	0	Corse2_OUT_4_0_Dent_dent	0	0
216	Dent_dent_(sub-)adult_of_NB_taxa	Dent_dent	(sub-)adult_of_NB_taxa	TOP	3	5	Sardinia	IN	4	0	0	0	Sardinia_IN_4_0_Dent_dent	0	0
217	Dipl_annu_(sub-)adult_of_NB_taxa	Dipl_annu	(sub-)adult_of_NB_taxa	CA_NB	3	4	Corse2	OUT	3	0	0	0	Corse2_OUT_3_0_Dipl_annu	0	0
218	Dipl_annu_(sub-)adult_of_NB_taxa	Dipl_annu	(sub-)adult_of_NB_taxa	CA_NB	3	4	Sardinia	OUT	2	0	0.00533333	0.078864	Sardinia_OUT_2_0_Dipl_annu	0.00533333	0.078864
219	Dipl_annu_(sub-)adult_of_NB_taxa	Dipl_annu	(sub-)adult_of_NB_taxa	CA_NB	3	4	Corse2	IN	2	0	0.022	0.701451	Corse2_IN_2_0_Dipl_annu	0.022	0.701451
220	Dipl_annu_(sub-)adult_of_NB_taxa	Dipl_annu	(sub-)adult_of_NB_taxa	CA_NB	3	4	Corse2	OUT	1	0	0.016	0.616434	Corse2_OUT_1_0_Dipl_annu	0.016	0.616434
221	Dipl_annu_(sub-)adult_of_NB_taxa	Dipl_annu	(sub-)adult_of_NB_taxa	CA_NB	3	4	Spain	IN	4	0	0	0	Spain_IN_4_0_Dipl_annu	0	0
222	Dipl_annu_(sub-)adult_of_NB_taxa	Dipl_annu	(sub-)adult_of_NB_taxa	CA_NB	3	4	Sardinia	IN	2	0	0	0	Sardinia_IN_2_0_Dipl_annu	0	0
223	Dipl_annu_(sub-)adult_of_NB_taxa	Dipl_annu	(sub-)adult_of_NB_taxa	CA_NB	3	4	Spain	OUT	2	0	0.006	0.213414	Spain_OUT_2_0_Dipl_annu	0.006	0.213414
224	Dipl_annu_(sub-)adult_of_NB_taxa	Dipl_annu	(sub-)adult_of_NB_taxa	CA_NB	3	4	Corse2	IN	4	0	0	0	Corse2_IN_4_0_Dipl_annu	0	0
225	Dipl_annu_(sub-)adult_of_NB_taxa	Dipl_annu	(sub-)adult_of_NB_taxa	CA_NB	3	4	Spain	OUT	3	0	0.014	0.446887	Spain_OUT_3_0_Dipl_annu	0.014	0.446887
226	Dipl_annu_(sub-)adult_of_NB_taxa	Dipl_annu	(sub-)adult_of_NB_taxa	CA_NB	3	4	Sardinia	IN	1	0	0	0	Sardinia_IN_1_0_Dipl_annu	0	0
227	Dipl_annu_(sub-)adult_of_NB_taxa	Dipl_annu	(sub-)adult_of_NB_taxa	CA_NB	3	4	Sardinia	OUT	3	0	0.006	0.252892	Sardinia_OUT_3_0_Dipl_annu	0.006	0.252892
228	Dipl_annu_(sub-)adult_of_NB_taxa	Dipl_annu	(sub-)adult_of_NB_taxa	CA_NB	3	4	Corse2	IN	1	0	0	0	Corse2_IN_1_0_Dipl_annu	0	0
229	Dipl_annu_(sub-)adult_of_NB_taxa	Dipl_annu	(sub-)adult_of_NB_taxa	CA_NB	3	4	Sardinia	OUT	1	0	0	0	Sardinia_OUT_1_0_Dipl_annu	0	0
230	Dipl_annu_(sub-)adult_of_NB_taxa	Dipl_annu	(sub-)adult_of_NB_taxa	CA_NB	3	4	Corse2	OUT	4	0	0.002	0.106901	Corse2_OUT_4_0_Dipl_annu	0.002	0.106901
231	Dipl_annu_(sub-)adult_of_NB_taxa	Dipl_annu	(sub-)adult_of_NB_taxa	CA_NB	3	4	Spain	IN	3	0	0	0	Spain_IN_3_0_Dipl_annu	0	0
232	Dipl_annu_(sub-)adult_of_NB_taxa	Dipl_annu	(sub-)adult_of_NB_taxa	CA_NB	3	4	Spain	OUT	1	0	0.006	0.333685	Spain_OUT_1_0_Dipl_annu	0.006	0.333685
233	Dipl_annu_(sub-)adult_of_NB_taxa	Dipl_annu	(sub-)adult_of_NB_taxa	CA_NB	3	4	Spain	OUT	4	0	0.01	0.495029	Spain_OUT_4_0_Dipl_annu	0.01	0.495029
234	Dipl_annu_(sub-)adult_of_NB_taxa	Dipl_annu	(sub-)adult_of_NB_taxa	CA_NB	3	4	Sardinia	IN	4	0	0	0	Sardinia_IN_4_0_Dipl_annu	0	0
235	Dipl_annu_(sub-)adult_of_NB_taxa	Dipl_annu	(sub-)adult_of_NB_taxa	CA_NB	3	4	Corse2	IN	3	0	0.01	0.337118	Corse2_IN_3_0_Dipl_annu	0.01	0.337118
236	Dipl_annu_(sub-)adult_of_NB_taxa	Dipl_annu	(sub-)adult_of_NB_taxa	CA_NB	3	4	Sardinia	OUT	4	0	0	0	Sardinia_OUT_4_0_Dipl_annu	0	0
237	Dipl_annu_(sub-)adult_of_NB_taxa	Dipl_annu	(sub-)adult_of_NB_taxa	CA_NB	3	4	Spain	IN	2	0	0	0	Spain_IN_2_0_Dipl_annu	0	0
238	Dipl_annu_(sub-)adult_of_NB_taxa	Dipl_annu	(sub-)adult_of_NB_taxa	CA_NB	3	4	Spain	IN	1	0	0	0	Spain_IN_1_0_Dipl_annu	0	0
239	Dipl_annu_(sub-)adult_of_NB_taxa	Dipl_annu	(sub-)adult_of_NB_taxa	CA_NB	3	4	Sardinia	IN	3	0	0	0	Sardinia_IN_3_0_Dipl_annu	0	0
240	Dipl_annu_(sub-)adult_of_NB_taxa	Dipl_annu	(sub-)adult_of_NB_taxa	CA_NB	3	4	Corse2	OUT	2	0	0.018	0.747752	Corse2_OUT_2_0_Dipl_annu	0.018	0.747752
241	Dipl_annu_CB_juvenile_of_NB_taxa	Dipl_annu	CB_juvenile_of_NB_taxa	CA_CB	2	3	Sardinia	IN	1	1	0	0	Sardinia_IN_1_1_Dipl_annu	0	0
242	Dipl_annu_CB_juvenile_of_NB_taxa	Dipl_annu	CB_juvenile_of_NB_taxa	CA_CB	2	3	Spain	OUT	2	1	0	0	Spain_OUT_2_1_Dipl_annu	0	0
243	Dipl_annu_CB_juvenile_of_NB_taxa	Dipl_annu	CB_juvenile_of_NB_taxa	CA_CB	2	3	Sardinia	OUT	1	1	0	0	Sardinia_OUT_1_1_Dipl_annu	0	0
244	Dipl_annu_CB_juvenile_of_NB_taxa	Dipl_annu	CB_juvenile_of_NB_taxa	CA_CB	2	3	Corse2	IN	3	1	0	0	Corse2_IN_3_1_Dipl_annu	0	0
245	Dipl_annu_CB_juvenile_of_NB_taxa	Dipl_annu	CB_juvenile_of_NB_taxa	CA_CB	2	3	Corse2	IN	4	1	0	0	Corse2_IN_4_1_Dipl_annu	0	0
246	Dipl_annu_CB_juvenile_of_NB_taxa	Dipl_annu	CB_juvenile_of_NB_taxa	CA_CB	2	3	Spain	OUT	1	1	0	0	Spain_OUT_1_1_Dipl_annu	0	0
247	Dipl_annu_CB_juvenile_of_NB_taxa	Dipl_annu	CB_juvenile_of_NB_taxa	CA_CB	2	3	Sardinia	IN	3	1	0	0	Sardinia_IN_3_1_Dipl_annu	0	0
248	Dipl_annu_CB_juvenile_of_NB_taxa	Dipl_annu	CB_juvenile_of_NB_taxa	CA_CB	2	3	Corse2	OUT	2	1	0	0	Corse2_OUT_2_1_Dipl_annu	0	0
249	Dipl_annu_CB_juvenile_of_NB_taxa	Dipl_annu	CB_juvenile_of_NB_taxa	CA_CB	2	3	Corse2	IN	1	1	0	0	Corse2_IN_1_1_Dipl_annu	0	0
250	Dipl_annu_CB_juvenile_of_NB_taxa	Dipl_annu	CB_juvenile_of_NB_taxa	CA_CB	2	3	Spain	IN	3	1	0	0	Spain_IN_3_1_Dipl_annu	0	0
251	Dipl_annu_CB_juvenile_of_NB_taxa	Dipl_annu	CB_juvenile_of_NB_taxa	CA_CB	2	3	Spain	OUT	3	1	0	0	Spain_OUT_3_1_Dipl_annu	0	0
252	Dipl_annu_CB_juvenile_of_NB_taxa	Dipl_annu	CB_juvenile_of_NB_taxa	CA_CB	2	3	Corse2	OUT	4	1	0	0	Corse2_OUT_4_1_Dipl_annu	0	0
253	Dipl_annu_CB_juvenile_of_NB_taxa	Dipl_annu	CB_juvenile_of_NB_taxa	CA_CB	2	3	Sardinia	IN	4	1	0.125	0.0386221	Sardinia_IN_4_1_Dipl_annu	0.125	0.0386221
254	Dipl_annu_CB_juvenile_of_NB_taxa	Dipl_annu	CB_juvenile_of_NB_taxa	CA_CB	2	3	Spain	IN	2	1	0	0	Spain_IN_2_1_Dipl_annu	0	0
255	Dipl_annu_CB_juvenile_of_NB_taxa	Dipl_annu	CB_juvenile_of_NB_taxa	CA_CB	2	3	Corse2	OUT	3	1	0	0	Corse2_OUT_3_1_Dipl_annu	0	0
256	Dipl_annu_CB_juvenile_of_NB_taxa	Dipl_annu	CB_juvenile_of_NB_taxa	CA_CB	2	3	Sardinia	OUT	2	1	0	0	Sardinia_OUT_2_1_Dipl_annu	0	0
257	Dipl_annu_CB_juvenile_of_NB_taxa	Dipl_annu	CB_juvenile_of_NB_taxa	CA_CB	2	3	Sardinia	OUT	3	1	0	0	Sardinia_OUT_3_1_Dipl_annu	0	0
258	Dipl_annu_CB_juvenile_of_NB_taxa	Dipl_annu	CB_juvenile_of_NB_taxa	CA_CB	2	3	Spain	IN	4	1	0	0	Spain_IN_4_1_Dipl_annu	0	0
259	Dipl_annu_CB_juvenile_of_NB_taxa	Dipl_annu	CB_juvenile_of_NB_taxa	CA_CB	2	3	Corse2	IN	2	1	0	0	Corse2_IN_2_1_Dipl_annu	0	0
260	Dipl_annu_CB_juvenile_of_NB_taxa	Dipl_annu	CB_juvenile_of_NB_taxa	CA_CB	2	3	Spain	IN	1	1	0	0	Spain_IN_1_1_Dipl_annu	0	0
261	Dipl_annu_CB_juvenile_of_NB_taxa	Dipl_annu	CB_juvenile_of_NB_taxa	CA_CB	2	3	Sardinia	IN	2	1	0	0	Sardinia_IN_2_1_Dipl_annu	0	0
262	Dipl_annu_CB_juvenile_of_NB_taxa	Dipl_annu	CB_juvenile_of_NB_taxa	CA_CB	2	3	Sardinia	OUT	4	1	0	0	Sardinia_OUT_4_1_Dipl_annu	0	0
263	Dipl_annu_CB_juvenile_of_NB_taxa	Dipl_annu	CB_juvenile_of_NB_taxa	CA_CB	2	3	Spain	OUT	4	1	0	0	Spain_OUT_4_1_Dipl_annu	0	0
264	Dipl_annu_CB_juvenile_of_NB_taxa	Dipl_annu	CB_juvenile_of_NB_taxa	CA_CB	2	3	Corse2	OUT	1	1	0	0	Corse2_OUT_1_1_Dipl_annu	0	0
265	Dipl_cerv_(sub-)adult_of_NB_taxa	Dipl_cerv	(sub-)adult_of_NB_taxa	CA_NB	3	4	Corse2	OUT	2	0	0	0	Corse2_OUT_2_0_Dipl_cerv	0	0
266	Dipl_cerv_(sub-)adult_of_NB_taxa	Dipl_cerv	(sub-)adult_of_NB_taxa	CA_NB	3	4	Spain	IN	3	0	0	0	Spain_IN_3_0_Dipl_cerv	0.00321429	2.64232
267	Dipl_cerv_(sub-)adult_of_NB_taxa	Dipl_cerv	(sub-)adult_of_NB_taxa	CA_NB	3	4	Spain	OUT	3	0	0.008	0.756975	Spain_OUT_3_0_Dipl_cerv	0.00871429	0.940788
268	Dipl_cerv_(sub-)adult_of_NB_taxa	Dipl_cerv	(sub-)adult_of_NB_taxa	CA_NB	3	4	Spain	OUT	4	0	0	0	Spain_OUT_4_0_Dipl_cerv	0	0
269	Dipl_cerv_(sub-)adult_of_NB_taxa	Dipl_cerv	(sub-)adult_of_NB_taxa	CA_NB	3	4	Sardinia	IN	1	0	0	0	Sardinia_IN_1_0_Dipl_cerv	0	0
270	Dipl_cerv_(sub-)adult_of_NB_taxa	Dipl_cerv	(sub-)adult_of_NB_taxa	CA_NB	3	4	Spain	OUT	2	0	0.002	0.0677804	Spain_OUT_2_0_Dipl_cerv	0.002	0.0677804
271	Dipl_cerv_(sub-)adult_of_NB_taxa	Dipl_cerv	(sub-)adult_of_NB_taxa	CA_NB	3	4	Sardinia	OUT	2	0	0	0	Sardinia_OUT_2_0_Dipl_cerv	0	0
272	Dipl_cerv_(sub-)adult_of_NB_taxa	Dipl_cerv	(sub-)adult_of_NB_taxa	CA_NB	3	4	Corse2	OUT	4	0	0	0	Corse2_OUT_4_0_Dipl_cerv	0	0
273	Dipl_cerv_(sub-)adult_of_NB_taxa	Dipl_cerv	(sub-)adult_of_NB_taxa	CA_NB	3	4	Corse2	IN	4	0	0	0	Corse2_IN_4_0_Dipl_cerv	0	0
274	Dipl_cerv_(sub-)adult_of_NB_taxa	Dipl_cerv	(sub-)adult_of_NB_taxa	CA_NB	3	4	Spain	IN	4	0	0	0	Spain_IN_4_0_Dipl_cerv	0.00321429	2.71712
275	Dipl_cerv_(sub-)adult_of_NB_taxa	Dipl_cerv	(sub-)adult_of_NB_taxa	CA_NB	3	4	Corse2	OUT	3	0	0	0	Corse2_OUT_3_0_Dipl_cerv	0	0
276	Dipl_cerv_(sub-)adult_of_NB_taxa	Dipl_cerv	(sub-)adult_of_NB_taxa	CA_NB	3	4	Sardinia	OUT	1	0	0	0	Sardinia_OUT_1_0_Dipl_cerv	0	0
277	Dipl_cerv_(sub-)adult_of_NB_taxa	Dipl_cerv	(sub-)adult_of_NB_taxa	CA_NB	3	4	Corse2	IN	3	0	0	0	Corse2_IN_3_0_Dipl_cerv	0	0
278	Dipl_cerv_(sub-)adult_of_NB_taxa	Dipl_cerv	(sub-)adult_of_NB_taxa	CA_NB	3	4	Sardinia	OUT	4	0	0	0	Sardinia_OUT_4_0_Dipl_cerv	0	0
279	Dipl_cerv_(sub-)adult_of_NB_taxa	Dipl_cerv	(sub-)adult_of_NB_taxa	CA_NB	3	4	Sardinia	IN	3	0	0	0	Sardinia_IN_3_0_Dipl_cerv	0	0
280	Dipl_cerv_(sub-)adult_of_NB_taxa	Dipl_cerv	(sub-)adult_of_NB_taxa	CA_NB	3	4	Sardinia	IN	4	0	0	0	Sardinia_IN_4_0_Dipl_cerv	0	0
281	Dipl_cerv_(sub-)adult_of_NB_taxa	Dipl_cerv	(sub-)adult_of_NB_taxa	CA_NB	3	4	Corse2	OUT	1	0	0	0	Corse2_OUT_1_0_Dipl_cerv	0	0
282	Dipl_cerv_(sub-)adult_of_NB_taxa	Dipl_cerv	(sub-)adult_of_NB_taxa	CA_NB	3	4	Corse2	IN	1	0	0	0	Corse2_IN_1_0_Dipl_cerv	0	0
283	Dipl_cerv_(sub-)adult_of_NB_taxa	Dipl_cerv	(sub-)adult_of_NB_taxa	CA_NB	3	4	Sardinia	IN	2	0	0	0	Sardinia_IN_2_0_Dipl_cerv	0	0
284	Dipl_cerv_(sub-)adult_of_NB_taxa	Dipl_cerv	(sub-)adult_of_NB_taxa	CA_NB	3	4	Spain	IN	1	0	0	0	Spain_IN_1_0_Dipl_cerv	0.000714286	0.253166
285	Dipl_cerv_(sub-)adult_of_NB_taxa	Dipl_cerv	(sub-)adult_of_NB_taxa	CA_NB	3	4	Sardinia	OUT	3	0	0	0	Sardinia_OUT_3_0_Dipl_cerv	0	0
286	Dipl_cerv_(sub-)adult_of_NB_taxa	Dipl_cerv	(sub-)adult_of_NB_taxa	CA_NB	3	4	Spain	IN	2	0	0	0	Spain_IN_2_0_Dipl_cerv	0	0
287	Dipl_cerv_(sub-)adult_of_NB_taxa	Dipl_cerv	(sub-)adult_of_NB_taxa	CA_NB	3	4	Spain	OUT	1	0	0	0	Spain_OUT_1_0_Dipl_cerv	0	0
288	Dipl_cerv_(sub-)adult_of_NB_taxa	Dipl_cerv	(sub-)adult_of_NB_taxa	CA_NB	3	4	Corse2	IN	2	0	0	0	Corse2_IN_2_0_Dipl_cerv	0	0
289	Dipl_punt_(sub-)adult_of_NB_taxa	Dipl_punt	(sub-)adult_of_NB_taxa	CA_NB	3	4	Spain	IN	4	0	0.024	16.1818	Spain_IN_4_0_Dipl_punt	0.024	16.1818
290	Dipl_punt_(sub-)adult_of_NB_taxa	Dipl_punt	(sub-)adult_of_NB_taxa	CA_NB	3	4	Spain	OUT	1	0	0.049	22.8965	Spain_OUT_1_0_Dipl_punt	0.049	22.8965
291	Dipl_punt_(sub-)adult_of_NB_taxa	Dipl_punt	(sub-)adult_of_NB_taxa	CA_NB	3	4	Sardinia	OUT	2	0	0	0	Sardinia_OUT_2_0_Dipl_punt	0	0
292	Dipl_punt_(sub-)adult_of_NB_taxa	Dipl_punt	(sub-)adult_of_NB_taxa	CA_NB	3	4	Sardinia	IN	4	0	0.004	0.776492	Sardinia_IN_4_0_Dipl_punt	0.004	0.776492
293	Dipl_punt_(sub-)adult_of_NB_taxa	Dipl_punt	(sub-)adult_of_NB_taxa	CA_NB	3	4	Sardinia	OUT	4	0	0	0	Sardinia_OUT_4_0_Dipl_punt	0	0
294	Dipl_punt_(sub-)adult_of_NB_taxa	Dipl_punt	(sub-)adult_of_NB_taxa	CA_NB	3	4	Corse2	OUT	4	0	0	0	Corse2_OUT_4_0_Dipl_punt	0	0
295	Dipl_punt_(sub-)adult_of_NB_taxa	Dipl_punt	(sub-)adult_of_NB_taxa	CA_NB	3	4	Corse2	OUT	2	0	0	0	Corse2_OUT_2_0_Dipl_punt	0	0
296	Dipl_punt_(sub-)adult_of_NB_taxa	Dipl_punt	(sub-)adult_of_NB_taxa	CA_NB	3	4	Spain	OUT	3	0	0.018	3.63988	Spain_OUT_3_0_Dipl_punt	0.018	3.63988
297	Dipl_punt_(sub-)adult_of_NB_taxa	Dipl_punt	(sub-)adult_of_NB_taxa	CA_NB	3	4	Sardinia	IN	1	0	0.004	0.214764	Sardinia_IN_1_0_Dipl_punt	0.004	0.214764
298	Dipl_punt_(sub-)adult_of_NB_taxa	Dipl_punt	(sub-)adult_of_NB_taxa	CA_NB	3	4	Corse2	IN	4	0	0	0	Corse2_IN_4_0_Dipl_punt	0	0
299	Dipl_punt_(sub-)adult_of_NB_taxa	Dipl_punt	(sub-)adult_of_NB_taxa	CA_NB	3	4	Sardinia	IN	3	0	0.02	5.88547	Sardinia_IN_3_0_Dipl_punt	0.02	5.88547
300	Dipl_punt_(sub-)adult_of_NB_taxa	Dipl_punt	(sub-)adult_of_NB_taxa	CA_NB	3	4	Spain	OUT	2	0	0.008	1.08322	Spain_OUT_2_0_Dipl_punt	0.008	1.08322
301	Dipl_punt_(sub-)adult_of_NB_taxa	Dipl_punt	(sub-)adult_of_NB_taxa	CA_NB	3	4	Corse2	OUT	3	0	0	0	Corse2_OUT_3_0_Dipl_punt	0	0
302	Dipl_punt_(sub-)adult_of_NB_taxa	Dipl_punt	(sub-)adult_of_NB_taxa	CA_NB	3	4	Sardinia	OUT	1	0	0	0	Sardinia_OUT_1_0_Dipl_punt	0	0
303	Dipl_punt_(sub-)adult_of_NB_taxa	Dipl_punt	(sub-)adult_of_NB_taxa	CA_NB	3	4	Sardinia	IN	2	0	0.028	16.7487	Sardinia_IN_2_0_Dipl_punt	0.028	16.7487
304	Dipl_punt_(sub-)adult_of_NB_taxa	Dipl_punt	(sub-)adult_of_NB_taxa	CA_NB	3	4	Corse2	IN	3	0	0.002	1.24292	Corse2_IN_3_0_Dipl_punt	0.002	1.24292
305	Dipl_punt_(sub-)adult_of_NB_taxa	Dipl_punt	(sub-)adult_of_NB_taxa	CA_NB	3	4	Spain	IN	1	0	0	0	Spain_IN_1_0_Dipl_punt	0	0
306	Dipl_punt_(sub-)adult_of_NB_taxa	Dipl_punt	(sub-)adult_of_NB_taxa	CA_NB	3	4	Corse2	OUT	1	0	0.008	4.08526	Corse2_OUT_1_0_Dipl_punt	0.008	4.08526
307	Dipl_punt_(sub-)adult_of_NB_taxa	Dipl_punt	(sub-)adult_of_NB_taxa	CA_NB	3	4	Spain	OUT	4	0	0	0	Spain_OUT_4_0_Dipl_punt	0	0
308	Dipl_punt_(sub-)adult_of_NB_taxa	Dipl_punt	(sub-)adult_of_NB_taxa	CA_NB	3	4	Sardinia	OUT	3	0	0	0	Sardinia_OUT_3_0_Dipl_punt	0	0
309	Dipl_punt_(sub-)adult_of_NB_taxa	Dipl_punt	(sub-)adult_of_NB_taxa	CA_NB	3	4	Spain	IN	3	0	0.014	8.81636	Spain_IN_3_0_Dipl_punt	0.014	8.81636
310	Dipl_punt_(sub-)adult_of_NB_taxa	Dipl_punt	(sub-)adult_of_NB_taxa	CA_NB	3	4	Corse2	IN	1	0	0	0	Corse2_IN_1_0_Dipl_punt	0	0
311	Dipl_punt_(sub-)adult_of_NB_taxa	Dipl_punt	(sub-)adult_of_NB_taxa	CA_NB	3	4	Spain	IN	2	0	0.01	1.25208	Spain_IN_2_0_Dipl_punt	0.01	1.25208
312	Dipl_punt_(sub-)adult_of_NB_taxa	Dipl_punt	(sub-)adult_of_NB_taxa	CA_NB	3	4	Corse2	IN	2	0	0	0	Corse2_IN_2_0_Dipl_punt	0	0
313	Dipl_sarg_(sub-)adult_of_NB_taxa	Dipl_sarg	(sub-)adult_of_NB_taxa	CA_NB	3	4	Spain	OUT	4	0	0.042	2.01819	Spain_OUT_4_0_Dipl_sarg	0.042	2.01819
314	Dipl_sarg_(sub-)adult_of_NB_taxa	Dipl_sarg	(sub-)adult_of_NB_taxa	CA_NB	3	4	Spain	IN	3	0	0.034	9.37993	Spain_IN_3_0_Dipl_sarg	0.034	9.37993
315	Dipl_sarg_(sub-)adult_of_NB_taxa	Dipl_sarg	(sub-)adult_of_NB_taxa	CA_NB	3	4	Spain	OUT	3	0	0.131	8.417	Spain_OUT_3_0_Dipl_sarg	0.131	8.417
316	Dipl_sarg_(sub-)adult_of_NB_taxa	Dipl_sarg	(sub-)adult_of_NB_taxa	CA_NB	3	4	Corse2	OUT	3	0	0.044	10.4246	Corse2_OUT_3_0_Dipl_sarg	0.044	10.4246
317	Dipl_sarg_(sub-)adult_of_NB_taxa	Dipl_sarg	(sub-)adult_of_NB_taxa	CA_NB	3	4	Spain	IN	1	0	0.002	0.102263	Spain_IN_1_0_Dipl_sarg	0.002	0.102263
318	Dipl_sarg_(sub-)adult_of_NB_taxa	Dipl_sarg	(sub-)adult_of_NB_taxa	CA_NB	3	4	Spain	IN	4	0	0.028	8.92933	Spain_IN_4_0_Dipl_sarg	0.028	8.92933
319	Dipl_sarg_(sub-)adult_of_NB_taxa	Dipl_sarg	(sub-)adult_of_NB_taxa	CA_NB	3	4	Spain	OUT	2	0	0.172	10.9041	Spain_OUT_2_0_Dipl_sarg	0.172	10.9041
320	Dipl_sarg_(sub-)adult_of_NB_taxa	Dipl_sarg	(sub-)adult_of_NB_taxa	CA_NB	3	4	Spain	IN	2	0	0	0	Spain_IN_2_0_Dipl_sarg	0	0
321	Dipl_sarg_(sub-)adult_of_NB_taxa	Dipl_sarg	(sub-)adult_of_NB_taxa	CA_NB	3	4	Sardinia	OUT	3	0	0.014	1.18288	Sardinia_OUT_3_0_Dipl_sarg	0.014	1.18288
322	Dipl_sarg_(sub-)adult_of_NB_taxa	Dipl_sarg	(sub-)adult_of_NB_taxa	CA_NB	3	4	Spain	OUT	1	0	0.068	7.84201	Spain_OUT_1_0_Dipl_sarg	0.068	7.84201
323	Dipl_sarg_(sub-)adult_of_NB_taxa	Dipl_sarg	(sub-)adult_of_NB_taxa	CA_NB	3	4	Sardinia	OUT	2	0	0.00533333	0.180748	Sardinia_OUT_2_0_Dipl_sarg	0.00533333	0.180748
324	Dipl_sarg_(sub-)adult_of_NB_taxa	Dipl_sarg	(sub-)adult_of_NB_taxa	CA_NB	3	4	Sardinia	IN	3	0	0.04	7.53868	Sardinia_IN_3_0_Dipl_sarg	0.04	7.53868
325	Dipl_sarg_(sub-)adult_of_NB_taxa	Dipl_sarg	(sub-)adult_of_NB_taxa	CA_NB	3	4	Sardinia	OUT	1	0	0.008	0.542222	Sardinia_OUT_1_0_Dipl_sarg	0.008	0.542222
326	Dipl_sarg_(sub-)adult_of_NB_taxa	Dipl_sarg	(sub-)adult_of_NB_taxa	CA_NB	3	4	Corse2	IN	1	0	0.273	140.01	Corse2_IN_1_0_Dipl_sarg	0.273	140.01
327	Dipl_sarg_(sub-)adult_of_NB_taxa	Dipl_sarg	(sub-)adult_of_NB_taxa	CA_NB	3	4	Corse2	IN	4	0	0.135	54.8204	Corse2_IN_4_0_Dipl_sarg	0.135	54.8204
328	Dipl_sarg_(sub-)adult_of_NB_taxa	Dipl_sarg	(sub-)adult_of_NB_taxa	CA_NB	3	4	Sardinia	OUT	4	0	0.01	1.02968	Sardinia_OUT_4_0_Dipl_sarg	0.01	1.02968
329	Dipl_sarg_(sub-)adult_of_NB_taxa	Dipl_sarg	(sub-)adult_of_NB_taxa	CA_NB	3	4	Corse2	OUT	1	0	0.126	29.6212	Corse2_OUT_1_0_Dipl_sarg	0.126	29.6212
330	Dipl_sarg_(sub-)adult_of_NB_taxa	Dipl_sarg	(sub-)adult_of_NB_taxa	CA_NB	3	4	Corse2	OUT	2	0	0.128	33.7468	Corse2_OUT_2_0_Dipl_sarg	0.128	33.7468
331	Dipl_sarg_(sub-)adult_of_NB_taxa	Dipl_sarg	(sub-)adult_of_NB_taxa	CA_NB	3	4	Sardinia	IN	4	0	0.014	1.59116	Sardinia_IN_4_0_Dipl_sarg	0.014	1.59116
332	Dipl_sarg_(sub-)adult_of_NB_taxa	Dipl_sarg	(sub-)adult_of_NB_taxa	CA_NB	3	4	Sardinia	IN	2	0	0.008	5.94919	Sardinia_IN_2_0_Dipl_sarg	0.008	5.94919
333	Dipl_sarg_(sub-)adult_of_NB_taxa	Dipl_sarg	(sub-)adult_of_NB_taxa	CA_NB	3	4	Sardinia	IN	1	0	0	0	Sardinia_IN_1_0_Dipl_sarg	0	0
334	Dipl_sarg_(sub-)adult_of_NB_taxa	Dipl_sarg	(sub-)adult_of_NB_taxa	CA_NB	3	4	Corse2	OUT	4	0	0.01	2.29664	Corse2_OUT_4_0_Dipl_sarg	0.01	2.29664
335	Dipl_sarg_(sub-)adult_of_NB_taxa	Dipl_sarg	(sub-)adult_of_NB_taxa	CA_NB	3	4	Corse2	IN	2	0	0.125	59.3531	Corse2_IN_2_0_Dipl_sarg	0.125	59.3531
336	Dipl_sarg_(sub-)adult_of_NB_taxa	Dipl_sarg	(sub-)adult_of_NB_taxa	CA_NB	3	4	Corse2	IN	3	0	0.057	28.1949	Corse2_IN_3_0_Dipl_sarg	0.057	28.1949
337	Dipl_vulg_(sub-)adult_of_NB_taxa	Dipl_vulg	(sub-)adult_of_NB_taxa	CA_NB	3	4	Spain	OUT	1	0	0.159	10.7382	Spain_OUT_1_0_Dipl_vulg	0.159	10.7382
338	Dipl_vulg_(sub-)adult_of_NB_taxa	Dipl_vulg	(sub-)adult_of_NB_taxa	CA_NB	3	4	Corse2	IN	1	0	0.143	21.9269	Corse2_IN_1_0_Dipl_vulg	0.143	21.9269
339	Dipl_vulg_(sub-)adult_of_NB_taxa	Dipl_vulg	(sub-)adult_of_NB_taxa	CA_NB	3	4	Spain	IN	2	0	0.016	1.13214	Spain_IN_2_0_Dipl_vulg	0.016	1.13214
340	Dipl_vulg_(sub-)adult_of_NB_taxa	Dipl_vulg	(sub-)adult_of_NB_taxa	CA_NB	3	4	Spain	IN	3	0	0.04	5.11703	Spain_IN_3_0_Dipl_vulg	0.04	5.11703
341	Dipl_vulg_(sub-)adult_of_NB_taxa	Dipl_vulg	(sub-)adult_of_NB_taxa	CA_NB	3	4	Spain	OUT	3	0	0.028	0.942864	Spain_OUT_3_0_Dipl_vulg	0.028	0.942864
342	Dipl_vulg_(sub-)adult_of_NB_taxa	Dipl_vulg	(sub-)adult_of_NB_taxa	CA_NB	3	4	Spain	IN	4	0	0.093	13.869	Spain_IN_4_0_Dipl_vulg	0.093	13.869
343	Dipl_vulg_(sub-)adult_of_NB_taxa	Dipl_vulg	(sub-)adult_of_NB_taxa	CA_NB	3	4	Sardinia	IN	3	0	0.376	33.5637	Sardinia_IN_3_0_Dipl_vulg	0.376	33.5637
344	Dipl_vulg_(sub-)adult_of_NB_taxa	Dipl_vulg	(sub-)adult_of_NB_taxa	CA_NB	3	4	Spain	IN	1	0	0.027	1.91201	Spain_IN_1_0_Dipl_vulg	0.027	1.91201
345	Dipl_vulg_(sub-)adult_of_NB_taxa	Dipl_vulg	(sub-)adult_of_NB_taxa	CA_NB	3	4	Corse2	IN	3	0	0.002	0.0890253	Corse2_IN_3_0_Dipl_vulg	0.002	0.0890253
346	Dipl_vulg_(sub-)adult_of_NB_taxa	Dipl_vulg	(sub-)adult_of_NB_taxa	CA_NB	3	4	Spain	OUT	2	0	0.148	4.4666	Spain_OUT_2_0_Dipl_vulg	0.148	4.4666
347	Dipl_vulg_(sub-)adult_of_NB_taxa	Dipl_vulg	(sub-)adult_of_NB_taxa	CA_NB	3	4	Sardinia	OUT	2	0	0.186667	4.62366	Sardinia_OUT_2_0_Dipl_vulg	0.186667	4.62366
348	Dipl_vulg_(sub-)adult_of_NB_taxa	Dipl_vulg	(sub-)adult_of_NB_taxa	CA_NB	3	4	Corse2	IN	4	0	0.137	32.0346	Corse2_IN_4_0_Dipl_vulg	0.137	32.0346
349	Dipl_vulg_(sub-)adult_of_NB_taxa	Dipl_vulg	(sub-)adult_of_NB_taxa	CA_NB	3	4	Sardinia	IN	4	0	0.256	14.0358	Sardinia_IN_4_0_Dipl_vulg	0.256	14.0358
350	Dipl_vulg_(sub-)adult_of_NB_taxa	Dipl_vulg	(sub-)adult_of_NB_taxa	CA_NB	3	4	Corse2	OUT	1	0	0.07	16.0732	Corse2_OUT_1_0_Dipl_vulg	0.07	16.0732
351	Dipl_vulg_(sub-)adult_of_NB_taxa	Dipl_vulg	(sub-)adult_of_NB_taxa	CA_NB	3	4	Sardinia	OUT	4	0	0.148	2.16229	Sardinia_OUT_4_0_Dipl_vulg	0.148	2.16229
352	Dipl_vulg_(sub-)adult_of_NB_taxa	Dipl_vulg	(sub-)adult_of_NB_taxa	CA_NB	3	4	Spain	OUT	4	0	0.118	3.93834	Spain_OUT_4_0_Dipl_vulg	0.118	3.93834
353	Dipl_vulg_(sub-)adult_of_NB_taxa	Dipl_vulg	(sub-)adult_of_NB_taxa	CA_NB	3	4	Sardinia	OUT	1	0	0.124	4.35885	Sardinia_OUT_1_0_Dipl_vulg	0.124	4.35885
354	Dipl_vulg_(sub-)adult_of_NB_taxa	Dipl_vulg	(sub-)adult_of_NB_taxa	CA_NB	3	4	Sardinia	IN	2	0	0.172	20.8186	Sardinia_IN_2_0_Dipl_vulg	0.172	20.8186
355	Dipl_vulg_(sub-)adult_of_NB_taxa	Dipl_vulg	(sub-)adult_of_NB_taxa	CA_NB	3	4	Sardinia	IN	1	0	0.064	6.38627	Sardinia_IN_1_0_Dipl_vulg	0.064	6.38627
356	Dipl_vulg_(sub-)adult_of_NB_taxa	Dipl_vulg	(sub-)adult_of_NB_taxa	CA_NB	3	4	Sardinia	OUT	3	0	0.212	4.4218	Sardinia_OUT_3_0_Dipl_vulg	0.212	4.4218
357	Dipl_vulg_(sub-)adult_of_NB_taxa	Dipl_vulg	(sub-)adult_of_NB_taxa	CA_NB	3	4	Corse2	IN	2	0	0.076	22.0085	Corse2_IN_2_0_Dipl_vulg	0.076	22.0085
358	Dipl_vulg_(sub-)adult_of_NB_taxa	Dipl_vulg	(sub-)adult_of_NB_taxa	CA_NB	3	4	Corse2	OUT	4	0	0.088	7.13182	Corse2_OUT_4_0_Dipl_vulg	0.088	7.13182
359	Dipl_vulg_(sub-)adult_of_NB_taxa	Dipl_vulg	(sub-)adult_of_NB_taxa	CA_NB	3	4	Corse2	OUT	3	0	0.17	23.6315	Corse2_OUT_3_0_Dipl_vulg	0.17	23.6315
360	Dipl_vulg_(sub-)adult_of_NB_taxa	Dipl_vulg	(sub-)adult_of_NB_taxa	CA_NB	3	4	Corse2	OUT	2	0	0.034	6.03611	Corse2_OUT_2_0_Dipl_vulg	0.034	6.03611
361	Dipl_vulg_CB_juvenile_of_NB_taxa	Dipl_vulg	CB_juvenile_of_NB_taxa	CA_CB	2	3	Sardinia	IN	1	1	0	0	Sardinia_IN_1_1_Dipl_vulg	0	0
362	Dipl_vulg_CB_juvenile_of_NB_taxa	Dipl_vulg	CB_juvenile_of_NB_taxa	CA_CB	2	3	Spain	OUT	2	1	0.025	0.0327959	Spain_OUT_2_1_Dipl_vulg	0.025	0.0327959
363	Dipl_vulg_CB_juvenile_of_NB_taxa	Dipl_vulg	CB_juvenile_of_NB_taxa	CA_CB	2	3	Spain	OUT	1	1	0.025	0.0166795	Spain_OUT_1_1_Dipl_vulg	0.025	0.0166795
364	Dipl_vulg_CB_juvenile_of_NB_taxa	Dipl_vulg	CB_juvenile_of_NB_taxa	CA_CB	2	3	Corse2	IN	1	1	0	0	Corse2_IN_1_1_Dipl_vulg	0	0
365	Dipl_vulg_CB_juvenile_of_NB_taxa	Dipl_vulg	CB_juvenile_of_NB_taxa	CA_CB	2	3	Spain	OUT	3	1	0	0	Spain_OUT_3_1_Dipl_vulg	0	0
366	Dipl_vulg_CB_juvenile_of_NB_taxa	Dipl_vulg	CB_juvenile_of_NB_taxa	CA_CB	2	3	Corse2	IN	4	1	0	0	Corse2_IN_4_1_Dipl_vulg	0	0
367	Dipl_vulg_CB_juvenile_of_NB_taxa	Dipl_vulg	CB_juvenile_of_NB_taxa	CA_CB	2	3	Spain	IN	2	1	0	0	Spain_IN_2_1_Dipl_vulg	0	0
368	Dipl_vulg_CB_juvenile_of_NB_taxa	Dipl_vulg	CB_juvenile_of_NB_taxa	CA_CB	2	3	Spain	OUT	4	1	0	0	Spain_OUT_4_1_Dipl_vulg	0	0
369	Dipl_vulg_CB_juvenile_of_NB_taxa	Dipl_vulg	CB_juvenile_of_NB_taxa	CA_CB	2	3	Sardinia	OUT	1	1	0	0	Sardinia_OUT_1_1_Dipl_vulg	0	0
370	Dipl_vulg_CB_juvenile_of_NB_taxa	Dipl_vulg	CB_juvenile_of_NB_taxa	CA_CB	2	3	Spain	IN	4	1	0	0	Spain_IN_4_1_Dipl_vulg	0	0
371	Dipl_vulg_CB_juvenile_of_NB_taxa	Dipl_vulg	CB_juvenile_of_NB_taxa	CA_CB	2	3	Corse2	OUT	3	1	0	0	Corse2_OUT_3_1_Dipl_vulg	0	0
372	Dipl_vulg_CB_juvenile_of_NB_taxa	Dipl_vulg	CB_juvenile_of_NB_taxa	CA_CB	2	3	Spain	IN	3	1	0	0	Spain_IN_3_1_Dipl_vulg	0	0
373	Dipl_vulg_CB_juvenile_of_NB_taxa	Dipl_vulg	CB_juvenile_of_NB_taxa	CA_CB	2	3	Sardinia	IN	3	1	0	0	Sardinia_IN_3_1_Dipl_vulg	0	0
374	Dipl_vulg_CB_juvenile_of_NB_taxa	Dipl_vulg	CB_juvenile_of_NB_taxa	CA_CB	2	3	Sardinia	OUT	3	1	0.125	0.163979	Sardinia_OUT_3_1_Dipl_vulg	0.125	0.163979
375	Dipl_vulg_CB_juvenile_of_NB_taxa	Dipl_vulg	CB_juvenile_of_NB_taxa	CA_CB	2	3	Corse2	OUT	4	1	0	0	Corse2_OUT_4_1_Dipl_vulg	0	0
376	Dipl_vulg_CB_juvenile_of_NB_taxa	Dipl_vulg	CB_juvenile_of_NB_taxa	CA_CB	2	3	Sardinia	IN	4	1	0	0	Sardinia_IN_4_1_Dipl_vulg	0	0
377	Dipl_vulg_CB_juvenile_of_NB_taxa	Dipl_vulg	CB_juvenile_of_NB_taxa	CA_CB	2	3	Spain	IN	1	1	0	0	Spain_IN_1_1_Dipl_vulg	0	0
378	Dipl_vulg_CB_juvenile_of_NB_taxa	Dipl_vulg	CB_juvenile_of_NB_taxa	CA_CB	2	3	Corse2	OUT	1	1	0	0	Corse2_OUT_1_1_Dipl_vulg	0	0
379	Dipl_vulg_CB_juvenile_of_NB_taxa	Dipl_vulg	CB_juvenile_of_NB_taxa	CA_CB	2	3	Corse2	OUT	2	1	0	0	Corse2_OUT_2_1_Dipl_vulg	0	0
380	Dipl_vulg_CB_juvenile_of_NB_taxa	Dipl_vulg	CB_juvenile_of_NB_taxa	CA_CB	2	3	Sardinia	OUT	4	1	0.4	0.524734	Sardinia_OUT_4_1_Dipl_vulg	0.4	0.524734
381	Dipl_vulg_CB_juvenile_of_NB_taxa	Dipl_vulg	CB_juvenile_of_NB_taxa	CA_CB	2	3	Corse2	IN	3	1	0	0	Corse2_IN_3_1_Dipl_vulg	0	0
382	Dipl_vulg_CB_juvenile_of_NB_taxa	Dipl_vulg	CB_juvenile_of_NB_taxa	CA_CB	2	3	Sardinia	IN	2	1	0	0	Sardinia_IN_2_1_Dipl_vulg	0	0
383	Dipl_vulg_CB_juvenile_of_NB_taxa	Dipl_vulg	CB_juvenile_of_NB_taxa	CA_CB	2	3	Corse2	IN	2	1	0	0	Corse2_IN_2_1_Dipl_vulg	0	0
384	Dipl_vulg_CB_juvenile_of_NB_taxa	Dipl_vulg	CB_juvenile_of_NB_taxa	CA_CB	2	3	Sardinia	OUT	2	1	0	0	Sardinia_OUT_2_1_Dipl_vulg	0	0
385	Epin_cost_(sub-)adult_of_NB_taxa	Epin_cost	(sub-)adult_of_NB_taxa	TOP	3	5	Spain	IN	2	0	0	0	Spain_IN_2_0_Epin_cost	0	0
386	Epin_cost_(sub-)adult_of_NB_taxa	Epin_cost	(sub-)adult_of_NB_taxa	TOP	3	5	Sardinia	OUT	1	0	0	0	Sardinia_OUT_1_0_Epin_cost	0	0
387	Epin_cost_(sub-)adult_of_NB_taxa	Epin_cost	(sub-)adult_of_NB_taxa	TOP	3	5	Sardinia	IN	3	0	0	0	Sardinia_IN_3_0_Epin_cost	0	0
388	Epin_cost_(sub-)adult_of_NB_taxa	Epin_cost	(sub-)adult_of_NB_taxa	TOP	3	5	Sardinia	OUT	3	0	0	0	Sardinia_OUT_3_0_Epin_cost	0	0
389	Epin_cost_(sub-)adult_of_NB_taxa	Epin_cost	(sub-)adult_of_NB_taxa	TOP	3	5	Spain	OUT	4	0	0	0	Spain_OUT_4_0_Epin_cost	0	0
390	Epin_cost_(sub-)adult_of_NB_taxa	Epin_cost	(sub-)adult_of_NB_taxa	TOP	3	5	Spain	OUT	2	0	0	0	Spain_OUT_2_0_Epin_cost	0	0
391	Epin_cost_(sub-)adult_of_NB_taxa	Epin_cost	(sub-)adult_of_NB_taxa	TOP	3	5	Corse2	OUT	3	0	0	0	Corse2_OUT_3_0_Epin_cost	0	0
392	Epin_cost_(sub-)adult_of_NB_taxa	Epin_cost	(sub-)adult_of_NB_taxa	TOP	3	5	Corse2	IN	2	0	0	0	Corse2_IN_2_0_Epin_cost	0	0
393	Epin_cost_(sub-)adult_of_NB_taxa	Epin_cost	(sub-)adult_of_NB_taxa	TOP	3	5	Spain	IN	1	0	0	0	Spain_IN_1_0_Epin_cost	0	0
394	Epin_cost_(sub-)adult_of_NB_taxa	Epin_cost	(sub-)adult_of_NB_taxa	TOP	3	5	Sardinia	OUT	2	0	0	0	Sardinia_OUT_2_0_Epin_cost	0	0
395	Epin_cost_(sub-)adult_of_NB_taxa	Epin_cost	(sub-)adult_of_NB_taxa	TOP	3	5	Spain	OUT	3	0	0	0	Spain_OUT_3_0_Epin_cost	0	0
396	Epin_cost_(sub-)adult_of_NB_taxa	Epin_cost	(sub-)adult_of_NB_taxa	TOP	3	5	Corse2	IN	1	0	0	0	Corse2_IN_1_0_Epin_cost	0	0
397	Epin_cost_(sub-)adult_of_NB_taxa	Epin_cost	(sub-)adult_of_NB_taxa	TOP	3	5	Corse2	IN	4	0	0	0	Corse2_IN_4_0_Epin_cost	0	0
398	Epin_cost_(sub-)adult_of_NB_taxa	Epin_cost	(sub-)adult_of_NB_taxa	TOP	3	5	Spain	OUT	1	0	0	0	Spain_OUT_1_0_Epin_cost	0	0
399	Epin_cost_(sub-)adult_of_NB_taxa	Epin_cost	(sub-)adult_of_NB_taxa	TOP	3	5	Sardinia	IN	4	0	0	0	Sardinia_IN_4_0_Epin_cost	0	0
400	Epin_cost_(sub-)adult_of_NB_taxa	Epin_cost	(sub-)adult_of_NB_taxa	TOP	3	5	Sardinia	IN	1	0	0	0	Sardinia_IN_1_0_Epin_cost	0	0
401	Epin_cost_(sub-)adult_of_NB_taxa	Epin_cost	(sub-)adult_of_NB_taxa	TOP	3	5	Corse2	OUT	2	0	0	0	Corse2_OUT_2_0_Epin_cost	0	0
402	Epin_cost_(sub-)adult_of_NB_taxa	Epin_cost	(sub-)adult_of_NB_taxa	TOP	3	5	Corse2	OUT	4	0	0	0	Corse2_OUT_4_0_Epin_cost	0	0
403	Epin_cost_(sub-)adult_of_NB_taxa	Epin_cost	(sub-)adult_of_NB_taxa	TOP	3	5	Spain	IN	4	0	0	0	Spain_IN_4_0_Epin_cost	0	0
404	Epin_cost_(sub-)adult_of_NB_taxa	Epin_cost	(sub-)adult_of_NB_taxa	TOP	3	5	Corse2	OUT	1	0	0	0	Corse2_OUT_1_0_Epin_cost	0	0
405	Epin_cost_(sub-)adult_of_NB_taxa	Epin_cost	(sub-)adult_of_NB_taxa	TOP	3	5	Sardinia	OUT	4	0	0	0	Sardinia_OUT_4_0_Epin_cost	0	0
406	Epin_cost_(sub-)adult_of_NB_taxa	Epin_cost	(sub-)adult_of_NB_taxa	TOP	3	5	Sardinia	IN	2	0	0	0	Sardinia_IN_2_0_Epin_cost	0	0
407	Epin_cost_(sub-)adult_of_NB_taxa	Epin_cost	(sub-)adult_of_NB_taxa	TOP	3	5	Corse2	IN	3	0	0	0	Corse2_IN_3_0_Epin_cost	0	0
408	Epin_cost_(sub-)adult_of_NB_taxa	Epin_cost	(sub-)adult_of_NB_taxa	TOP	3	5	Spain	IN	3	0	0	0	Spain_IN_3_0_Epin_cost	0.000714286	4.31363
409	Epin_marg_(sub-)adult_of_NB_taxa	Epin_marg	(sub-)adult_of_NB_taxa	TOP	3	5	Spain	OUT	4	0	0	0	Spain_OUT_4_0_Epin_marg	0.000714286	0.684518
410	Epin_marg_(sub-)adult_of_NB_taxa	Epin_marg	(sub-)adult_of_NB_taxa	TOP	3	5	Spain	IN	2	0	0.004	1.26773	Spain_IN_2_0_Epin_marg	0.0065	16.975
411	Epin_marg_(sub-)adult_of_NB_taxa	Epin_marg	(sub-)adult_of_NB_taxa	TOP	3	5	Spain	IN	4	0	0	0	Spain_IN_4_0_Epin_marg	0.00571429	49.3964
412	Epin_marg_(sub-)adult_of_NB_taxa	Epin_marg	(sub-)adult_of_NB_taxa	TOP	3	5	Sardinia	IN	2	0	0.004	4.22687	Sardinia_IN_2_0_Epin_marg	0.00342857	3.16837
413	Epin_marg_(sub-)adult_of_NB_taxa	Epin_marg	(sub-)adult_of_NB_taxa	TOP	3	5	Spain	OUT	2	0	0	0	Spain_OUT_2_0_Epin_marg	0	0
414	Epin_marg_(sub-)adult_of_NB_taxa	Epin_marg	(sub-)adult_of_NB_taxa	TOP	3	5	Corse2	OUT	2	0	0	0	Corse2_OUT_2_0_Epin_marg	0	0
415	Epin_marg_(sub-)adult_of_NB_taxa	Epin_marg	(sub-)adult_of_NB_taxa	TOP	3	5	Sardinia	OUT	2	0	0	0	Sardinia_OUT_2_0_Epin_marg	0	0
416	Epin_marg_(sub-)adult_of_NB_taxa	Epin_marg	(sub-)adult_of_NB_taxa	TOP	3	5	Sardinia	IN	1	0	0.006	33.1757	Sardinia_IN_1_0_Epin_marg	0.00321429	23.4445
417	Epin_marg_(sub-)adult_of_NB_taxa	Epin_marg	(sub-)adult_of_NB_taxa	TOP	3	5	Sardinia	OUT	4	0	0.002	0.292495	Sardinia_OUT_4_0_Epin_marg	0.002	0.292495
418	Epin_marg_(sub-)adult_of_NB_taxa	Epin_marg	(sub-)adult_of_NB_taxa	TOP	3	5	Corse2	OUT	4	0	0	0	Corse2_OUT_4_0_Epin_marg	0	0
419	Epin_marg_(sub-)adult_of_NB_taxa	Epin_marg	(sub-)adult_of_NB_taxa	TOP	3	5	Corse2	IN	4	0	0.002	0.567469	Corse2_IN_4_0_Epin_marg	0.00378571	9.47
420	Epin_marg_(sub-)adult_of_NB_taxa	Epin_marg	(sub-)adult_of_NB_taxa	TOP	3	5	Spain	IN	1	0	0.004	12.2026	Spain_IN_1_0_Epin_marg	0.00592857	25.1789
421	Epin_marg_(sub-)adult_of_NB_taxa	Epin_marg	(sub-)adult_of_NB_taxa	TOP	3	5	Sardinia	IN	4	0	0.012	9.03662	Sardinia_IN_4_0_Epin_marg	0.00942857	7.23966
422	Epin_marg_(sub-)adult_of_NB_taxa	Epin_marg	(sub-)adult_of_NB_taxa	TOP	3	5	Spain	OUT	1	0	0	0	Spain_OUT_1_0_Epin_marg	0	0
423	Epin_marg_(sub-)adult_of_NB_taxa	Epin_marg	(sub-)adult_of_NB_taxa	TOP	3	5	Corse2	OUT	1	0	0	0	Corse2_OUT_1_0_Epin_marg	0	0
424	Epin_marg_(sub-)adult_of_NB_taxa	Epin_marg	(sub-)adult_of_NB_taxa	TOP	3	5	Corse2	OUT	3	0	0	0	Corse2_OUT_3_0_Epin_marg	0	0
425	Epin_marg_(sub-)adult_of_NB_taxa	Epin_marg	(sub-)adult_of_NB_taxa	TOP	3	5	Spain	OUT	3	0	0	0	Spain_OUT_3_0_Epin_marg	0	0
426	Epin_marg_(sub-)adult_of_NB_taxa	Epin_marg	(sub-)adult_of_NB_taxa	TOP	3	5	Corse2	IN	2	0	0.002	25.4777	Corse2_IN_2_0_Epin_marg	0.00142857	4.50282
427	Epin_marg_(sub-)adult_of_NB_taxa	Epin_marg	(sub-)adult_of_NB_taxa	TOP	3	5	Corse2	IN	3	0	0.002	0.150764	Corse2_IN_3_0_Epin_marg	0.00271429	4.72192
428	Epin_marg_(sub-)adult_of_NB_taxa	Epin_marg	(sub-)adult_of_NB_taxa	TOP	3	5	Sardinia	IN	3	0	0.006	5.30629	Sardinia_IN_3_0_Epin_marg	0.00435714	1.26922
429	Epin_marg_(sub-)adult_of_NB_taxa	Epin_marg	(sub-)adult_of_NB_taxa	TOP	3	5	Corse2	IN	1	0	0.008	63.1544	Corse2_IN_1_0_Epin_marg	0.0178571	119.172
430	Epin_marg_(sub-)adult_of_NB_taxa	Epin_marg	(sub-)adult_of_NB_taxa	TOP	3	5	Sardinia	OUT	1	0	0	0	Sardinia_OUT_1_0_Epin_marg	0	0
431	Epin_marg_(sub-)adult_of_NB_taxa	Epin_marg	(sub-)adult_of_NB_taxa	TOP	3	5	Sardinia	OUT	3	0	0.002	0.975237	Sardinia_OUT_3_0_Epin_marg	0.002	0.975237
432	Epin_marg_(sub-)adult_of_NB_taxa	Epin_marg	(sub-)adult_of_NB_taxa	TOP	3	5	Spain	IN	3	0	0.004	37.5559	Spain_IN_3_0_Epin_marg	0.005	51.4686
433	Gobi_inde_CB_taxa	Gobi_inde	CB_taxa	CA_CB	1	3	Corse2	OUT	3	1	0	0	Corse2_OUT_3_1_Gobi_inde	0	0
434	Gobi_inde_CB_taxa	Gobi_inde	CB_taxa	CA_CB	1	3	Sardinia	IN	4	1	0	0	Sardinia_IN_4_1_Gobi_inde	0	0
435	Gobi_inde_CB_taxa	Gobi_inde	CB_taxa	CA_CB	1	3	Spain	OUT	4	1	0	0	Spain_OUT_4_1_Gobi_inde	0	0
436	Gobi_inde_CB_taxa	Gobi_inde	CB_taxa	CA_CB	1	3	Sardinia	OUT	1	1	0.05	0.00428709	Sardinia_OUT_1_1_Gobi_inde	0.05	0.00428709
437	Gobi_inde_CB_taxa	Gobi_inde	CB_taxa	CA_CB	1	3	Spain	OUT	3	1	0	0	Spain_OUT_3_1_Gobi_inde	0	0
438	Gobi_inde_CB_taxa	Gobi_inde	CB_taxa	CA_CB	1	3	Spain	OUT	1	1	0.025	0.314731	Spain_OUT_1_1_Gobi_inde	0.025	0.314731
439	Gobi_inde_CB_taxa	Gobi_inde	CB_taxa	CA_CB	1	3	Spain	OUT	2	1	0	0	Spain_OUT_2_1_Gobi_inde	0	0
440	Gobi_inde_CB_taxa	Gobi_inde	CB_taxa	CA_CB	1	3	Sardinia	IN	1	1	0	0	Sardinia_IN_1_1_Gobi_inde	0	0
441	Gobi_inde_CB_taxa	Gobi_inde	CB_taxa	CA_CB	1	3	Sardinia	IN	2	1	0	0	Sardinia_IN_2_1_Gobi_inde	0	0
442	Gobi_inde_CB_taxa	Gobi_inde	CB_taxa	CA_CB	1	3	Sardinia	IN	3	1	0.025	1.35118	Sardinia_IN_3_1_Gobi_inde	0.025	1.35118
443	Gobi_inde_CB_taxa	Gobi_inde	CB_taxa	CA_CB	1	3	Corse2	OUT	4	1	0	0	Corse2_OUT_4_1_Gobi_inde	0	0
444	Gobi_inde_CB_taxa	Gobi_inde	CB_taxa	CA_CB	1	3	Sardinia	OUT	4	1	0	0	Sardinia_OUT_4_1_Gobi_inde	0	0
445	Gobi_inde_CB_taxa	Gobi_inde	CB_taxa	CA_CB	1	3	Corse2	IN	1	1	0	0	Corse2_IN_1_1_Gobi_inde	0	0
446	Gobi_inde_CB_taxa	Gobi_inde	CB_taxa	CA_CB	1	3	Spain	IN	3	1	0	0	Spain_IN_3_1_Gobi_inde	0	0
447	Gobi_inde_CB_taxa	Gobi_inde	CB_taxa	CA_CB	1	3	Corse2	IN	3	1	0	0	Corse2_IN_3_1_Gobi_inde	0	0
448	Gobi_inde_CB_taxa	Gobi_inde	CB_taxa	CA_CB	1	3	Corse2	IN	4	1	0	0	Corse2_IN_4_1_Gobi_inde	0	0
449	Gobi_inde_CB_taxa	Gobi_inde	CB_taxa	CA_CB	1	3	Sardinia	OUT	3	1	0	0	Sardinia_OUT_3_1_Gobi_inde	0	0
450	Gobi_inde_CB_taxa	Gobi_inde	CB_taxa	CA_CB	1	3	Corse2	OUT	2	1	0	0	Corse2_OUT_2_1_Gobi_inde	0	0
451	Gobi_inde_CB_taxa	Gobi_inde	CB_taxa	CA_CB	1	3	Spain	IN	1	1	0	0	Spain_IN_1_1_Gobi_inde	0	0
452	Gobi_inde_CB_taxa	Gobi_inde	CB_taxa	CA_CB	1	3	Sardinia	OUT	2	1	0	0	Sardinia_OUT_2_1_Gobi_inde	0	0
453	Gobi_inde_CB_taxa	Gobi_inde	CB_taxa	CA_CB	1	3	Corse2	OUT	1	1	0	0	Corse2_OUT_1_1_Gobi_inde	0	0
454	Gobi_inde_CB_taxa	Gobi_inde	CB_taxa	CA_CB	1	3	Spain	IN	2	1	0	0	Spain_IN_2_1_Gobi_inde	0	0
455	Gobi_inde_CB_taxa	Gobi_inde	CB_taxa	CA_CB	1	3	Spain	IN	4	1	0	0	Spain_IN_4_1_Gobi_inde	0	0
456	Gobi_inde_CB_taxa	Gobi_inde	CB_taxa	CA_CB	1	3	Corse2	IN	2	1	0	0	Corse2_IN_2_1_Gobi_inde	0	0
457	Labr_meru_(sub-)adult_of_NB_taxa	Labr_meru	(sub-)adult_of_NB_taxa	CA_NB	3	4	Sardinia	OUT	2	0	0.00266667	0.261659	Sardinia_OUT_2_0_Labr_meru	0.00266667	0.261659
458	Labr_meru_(sub-)adult_of_NB_taxa	Labr_meru	(sub-)adult_of_NB_taxa	CA_NB	3	4	Spain	IN	2	0	0	0	Spain_IN_2_0_Labr_meru	0	0
459	Labr_meru_(sub-)adult_of_NB_taxa	Labr_meru	(sub-)adult_of_NB_taxa	CA_NB	3	4	Corse2	OUT	3	0	0.004	4.97291	Corse2_OUT_3_0_Labr_meru	0.004	4.97291
460	Labr_meru_(sub-)adult_of_NB_taxa	Labr_meru	(sub-)adult_of_NB_taxa	CA_NB	3	4	Sardinia	OUT	3	0	0	0	Sardinia_OUT_3_0_Labr_meru	0	0
461	Labr_meru_(sub-)adult_of_NB_taxa	Labr_meru	(sub-)adult_of_NB_taxa	CA_NB	3	4	Corse2	IN	3	0	0.006	3.97239	Corse2_IN_3_0_Labr_meru	0.006	3.97239
462	Labr_meru_(sub-)adult_of_NB_taxa	Labr_meru	(sub-)adult_of_NB_taxa	CA_NB	3	4	Spain	IN	3	0	0	0	Spain_IN_3_0_Labr_meru	0	0
463	Labr_meru_(sub-)adult_of_NB_taxa	Labr_meru	(sub-)adult_of_NB_taxa	CA_NB	3	4	Sardinia	IN	2	0	0.008	6.431	Sardinia_IN_2_0_Labr_meru	0.008	6.431
464	Labr_meru_(sub-)adult_of_NB_taxa	Labr_meru	(sub-)adult_of_NB_taxa	CA_NB	3	4	Corse2	OUT	4	0	0	0	Corse2_OUT_4_0_Labr_meru	0	0
465	Labr_meru_(sub-)adult_of_NB_taxa	Labr_meru	(sub-)adult_of_NB_taxa	CA_NB	3	4	Spain	OUT	1	0	0.004	1.71442	Spain_OUT_1_0_Labr_meru	0.004	1.71442
466	Labr_meru_(sub-)adult_of_NB_taxa	Labr_meru	(sub-)adult_of_NB_taxa	CA_NB	3	4	Sardinia	IN	4	0	0.004	2.05292	Sardinia_IN_4_0_Labr_meru	0.004	2.05292
467	Labr_meru_(sub-)adult_of_NB_taxa	Labr_meru	(sub-)adult_of_NB_taxa	CA_NB	3	4	Corse2	IN	4	0	0.008	1.35416	Corse2_IN_4_0_Labr_meru	0.008	1.35416
468	Labr_meru_(sub-)adult_of_NB_taxa	Labr_meru	(sub-)adult_of_NB_taxa	CA_NB	3	4	Spain	IN	1	0	0	0	Spain_IN_1_0_Labr_meru	0	0
469	Labr_meru_(sub-)adult_of_NB_taxa	Labr_meru	(sub-)adult_of_NB_taxa	CA_NB	3	4	Sardinia	OUT	1	0	0.008	2.97186	Sardinia_OUT_1_0_Labr_meru	0.008	2.97186
470	Labr_meru_(sub-)adult_of_NB_taxa	Labr_meru	(sub-)adult_of_NB_taxa	CA_NB	3	4	Corse2	IN	1	0	0	0	Corse2_IN_1_0_Labr_meru	0	0
471	Labr_meru_(sub-)adult_of_NB_taxa	Labr_meru	(sub-)adult_of_NB_taxa	CA_NB	3	4	Sardinia	IN	3	0	0	0	Sardinia_IN_3_0_Labr_meru	0	0
472	Labr_meru_(sub-)adult_of_NB_taxa	Labr_meru	(sub-)adult_of_NB_taxa	CA_NB	3	4	Sardinia	IN	1	0	0	0	Sardinia_IN_1_0_Labr_meru	0	0
473	Labr_meru_(sub-)adult_of_NB_taxa	Labr_meru	(sub-)adult_of_NB_taxa	CA_NB	3	4	Spain	OUT	4	0	0	0	Spain_OUT_4_0_Labr_meru	0	0
474	Labr_meru_(sub-)adult_of_NB_taxa	Labr_meru	(sub-)adult_of_NB_taxa	CA_NB	3	4	Sardinia	OUT	4	0	0	0	Sardinia_OUT_4_0_Labr_meru	0	0
475	Labr_meru_(sub-)adult_of_NB_taxa	Labr_meru	(sub-)adult_of_NB_taxa	CA_NB	3	4	Spain	OUT	3	0	0	0	Spain_OUT_3_0_Labr_meru	0	0
476	Labr_meru_(sub-)adult_of_NB_taxa	Labr_meru	(sub-)adult_of_NB_taxa	CA_NB	3	4	Corse2	OUT	1	0	0.002	1.62617	Corse2_OUT_1_0_Labr_meru	0.002	1.62617
477	Labr_meru_(sub-)adult_of_NB_taxa	Labr_meru	(sub-)adult_of_NB_taxa	CA_NB	3	4	Spain	OUT	2	0	0	0	Spain_OUT_2_0_Labr_meru	0	0
478	Labr_meru_(sub-)adult_of_NB_taxa	Labr_meru	(sub-)adult_of_NB_taxa	CA_NB	3	4	Corse2	OUT	2	0	0	0	Corse2_OUT_2_0_Labr_meru	0	0
479	Labr_meru_(sub-)adult_of_NB_taxa	Labr_meru	(sub-)adult_of_NB_taxa	CA_NB	3	4	Spain	IN	4	0	0	0	Spain_IN_4_0_Labr_meru	0	0
480	Labr_meru_(sub-)adult_of_NB_taxa	Labr_meru	(sub-)adult_of_NB_taxa	CA_NB	3	4	Corse2	IN	2	0	0.004	2.97635	Corse2_IN_2_0_Labr_meru	0.004	2.97635
481	Labr_viri_(sub-)adult_of_NB_taxa	Labr_viri	(sub-)adult_of_NB_taxa	CA_NB	3	4	Spain	OUT	2	0	0	0	Spain_OUT_2_0_Labr_viri	0	0
482	Labr_viri_(sub-)adult_of_NB_taxa	Labr_viri	(sub-)adult_of_NB_taxa	CA_NB	3	4	Spain	IN	1	0	0	0	Spain_IN_1_0_Labr_viri	0	0
483	Labr_viri_(sub-)adult_of_NB_taxa	Labr_viri	(sub-)adult_of_NB_taxa	CA_NB	3	4	Spain	OUT	4	0	0	0	Spain_OUT_4_0_Labr_viri	0	0
484	Labr_viri_(sub-)adult_of_NB_taxa	Labr_viri	(sub-)adult_of_NB_taxa	CA_NB	3	4	Sardinia	OUT	2	0	0	0	Sardinia_OUT_2_0_Labr_viri	0	0
485	Labr_viri_(sub-)adult_of_NB_taxa	Labr_viri	(sub-)adult_of_NB_taxa	CA_NB	3	4	Corse2	OUT	3	0	0	0	Corse2_OUT_3_0_Labr_viri	0	0
486	Labr_viri_(sub-)adult_of_NB_taxa	Labr_viri	(sub-)adult_of_NB_taxa	CA_NB	3	4	Spain	OUT	1	0	0	0	Spain_OUT_1_0_Labr_viri	0	0
487	Labr_viri_(sub-)adult_of_NB_taxa	Labr_viri	(sub-)adult_of_NB_taxa	CA_NB	3	4	Sardinia	IN	2	0	0.002	1.74601	Sardinia_IN_2_0_Labr_viri	0.002	1.74601
488	Labr_viri_(sub-)adult_of_NB_taxa	Labr_viri	(sub-)adult_of_NB_taxa	CA_NB	3	4	Spain	IN	2	0	0	0	Spain_IN_2_0_Labr_viri	0	0
489	Labr_viri_(sub-)adult_of_NB_taxa	Labr_viri	(sub-)adult_of_NB_taxa	CA_NB	3	4	Spain	IN	3	0	0	0	Spain_IN_3_0_Labr_viri	0	0
490	Labr_viri_(sub-)adult_of_NB_taxa	Labr_viri	(sub-)adult_of_NB_taxa	CA_NB	3	4	Spain	OUT	3	0	0	0	Spain_OUT_3_0_Labr_viri	0	0
491	Labr_viri_(sub-)adult_of_NB_taxa	Labr_viri	(sub-)adult_of_NB_taxa	CA_NB	3	4	Sardinia	OUT	1	0	0	0	Sardinia_OUT_1_0_Labr_viri	0	0
492	Labr_viri_(sub-)adult_of_NB_taxa	Labr_viri	(sub-)adult_of_NB_taxa	CA_NB	3	4	Spain	IN	4	0	0	0	Spain_IN_4_0_Labr_viri	0	0
493	Labr_viri_(sub-)adult_of_NB_taxa	Labr_viri	(sub-)adult_of_NB_taxa	CA_NB	3	4	Corse2	OUT	4	0	0	0	Corse2_OUT_4_0_Labr_viri	0	0
494	Labr_viri_(sub-)adult_of_NB_taxa	Labr_viri	(sub-)adult_of_NB_taxa	CA_NB	3	4	Corse2	IN	1	0	0	0	Corse2_IN_1_0_Labr_viri	0	0
495	Labr_viri_(sub-)adult_of_NB_taxa	Labr_viri	(sub-)adult_of_NB_taxa	CA_NB	3	4	Corse2	IN	3	0	0.004	0.62659	Corse2_IN_3_0_Labr_viri	0.004	0.62659
496	Labr_viri_(sub-)adult_of_NB_taxa	Labr_viri	(sub-)adult_of_NB_taxa	CA_NB	3	4	Sardinia	OUT	3	0	0	0	Sardinia_OUT_3_0_Labr_viri	0	0
497	Labr_viri_(sub-)adult_of_NB_taxa	Labr_viri	(sub-)adult_of_NB_taxa	CA_NB	3	4	Sardinia	OUT	4	0	0	0	Sardinia_OUT_4_0_Labr_viri	0	0
498	Labr_viri_(sub-)adult_of_NB_taxa	Labr_viri	(sub-)adult_of_NB_taxa	CA_NB	3	4	Sardinia	IN	1	0	0	0	Sardinia_IN_1_0_Labr_viri	0	0
499	Labr_viri_(sub-)adult_of_NB_taxa	Labr_viri	(sub-)adult_of_NB_taxa	CA_NB	3	4	Corse2	OUT	1	0	0.002	0.142631	Corse2_OUT_1_0_Labr_viri	0.002	0.142631
500	Labr_viri_(sub-)adult_of_NB_taxa	Labr_viri	(sub-)adult_of_NB_taxa	CA_NB	3	4	Sardinia	IN	3	0	0	0	Sardinia_IN_3_0_Labr_viri	0	0
501	Labr_viri_(sub-)adult_of_NB_taxa	Labr_viri	(sub-)adult_of_NB_taxa	CA_NB	3	4	Corse2	IN	4	0	0	0	Corse2_IN_4_0_Labr_viri	0	0
502	Labr_viri_(sub-)adult_of_NB_taxa	Labr_viri	(sub-)adult_of_NB_taxa	CA_NB	3	4	Corse2	OUT	2	0	0.01	0.713155	Corse2_OUT_2_0_Labr_viri	0.01	0.713155
503	Labr_viri_(sub-)adult_of_NB_taxa	Labr_viri	(sub-)adult_of_NB_taxa	CA_NB	3	4	Sardinia	IN	4	0	0	0	Sardinia_IN_4_0_Labr_viri	0	0
504	Labr_viri_(sub-)adult_of_NB_taxa	Labr_viri	(sub-)adult_of_NB_taxa	CA_NB	3	4	Corse2	IN	2	0	0.002	0.29129	Corse2_IN_2_0_Labr_viri	0.002	0.29129
505	Mull_surm_(sub-)adult_of_NB_taxa	Mull_surm	(sub-)adult_of_NB_taxa	CA_NB	3	4	Spain	OUT	2	0	0	0	Spain_OUT_2_0_Mull_surm	0	0
506	Mull_surm_(sub-)adult_of_NB_taxa	Mull_surm	(sub-)adult_of_NB_taxa	CA_NB	3	4	Corse2	OUT	3	0	0	0	Corse2_OUT_3_0_Mull_surm	0	0
507	Mull_surm_(sub-)adult_of_NB_taxa	Mull_surm	(sub-)adult_of_NB_taxa	CA_NB	3	4	Spain	IN	3	0	0	0	Spain_IN_3_0_Mull_surm	0	0
508	Mull_surm_(sub-)adult_of_NB_taxa	Mull_surm	(sub-)adult_of_NB_taxa	CA_NB	3	4	Spain	OUT	1	0	0	0	Spain_OUT_1_0_Mull_surm	0	0
509	Mull_surm_(sub-)adult_of_NB_taxa	Mull_surm	(sub-)adult_of_NB_taxa	CA_NB	3	4	Sardinia	IN	2	0	0.008	1.91815	Sardinia_IN_2_0_Mull_surm	0.008	1.91815
510	Mull_surm_(sub-)adult_of_NB_taxa	Mull_surm	(sub-)adult_of_NB_taxa	CA_NB	3	4	Spain	IN	1	0	0	0	Spain_IN_1_0_Mull_surm	0	0
511	Mull_surm_(sub-)adult_of_NB_taxa	Mull_surm	(sub-)adult_of_NB_taxa	CA_NB	3	4	Spain	IN	2	0	0	0	Spain_IN_2_0_Mull_surm	0	0
512	Mull_surm_(sub-)adult_of_NB_taxa	Mull_surm	(sub-)adult_of_NB_taxa	CA_NB	3	4	Corse2	IN	2	0	0.008	0.813322	Corse2_IN_2_0_Mull_surm	0.008	0.813322
513	Mull_surm_(sub-)adult_of_NB_taxa	Mull_surm	(sub-)adult_of_NB_taxa	CA_NB	3	4	Spain	OUT	3	0	0.016	1.17587	Spain_OUT_3_0_Mull_surm	0.016	1.17587
514	Mull_surm_(sub-)adult_of_NB_taxa	Mull_surm	(sub-)adult_of_NB_taxa	CA_NB	3	4	Sardinia	OUT	1	0	0.004	0.713035	Sardinia_OUT_1_0_Mull_surm	0.004	0.713035
515	Mull_surm_(sub-)adult_of_NB_taxa	Mull_surm	(sub-)adult_of_NB_taxa	CA_NB	3	4	Corse2	IN	4	0	0.08	0.199432	Corse2_IN_4_0_Mull_surm	0.08	0.199432
516	Mull_surm_(sub-)adult_of_NB_taxa	Mull_surm	(sub-)adult_of_NB_taxa	CA_NB	3	4	Sardinia	OUT	4	0	0.002	0.272704	Sardinia_OUT_4_0_Mull_surm	0.002	0.272704
517	Mull_surm_(sub-)adult_of_NB_taxa	Mull_surm	(sub-)adult_of_NB_taxa	CA_NB	3	4	Sardinia	OUT	2	0	0	0	Sardinia_OUT_2_0_Mull_surm	0	0
518	Mull_surm_(sub-)adult_of_NB_taxa	Mull_surm	(sub-)adult_of_NB_taxa	CA_NB	3	4	Sardinia	IN	4	0	0.02	2.34745	Sardinia_IN_4_0_Mull_surm	0.02	2.34745
519	Mull_surm_(sub-)adult_of_NB_taxa	Mull_surm	(sub-)adult_of_NB_taxa	CA_NB	3	4	Spain	IN	4	0	0	0	Spain_IN_4_0_Mull_surm	0	0
520	Mull_surm_(sub-)adult_of_NB_taxa	Mull_surm	(sub-)adult_of_NB_taxa	CA_NB	3	4	Corse2	OUT	2	0	0.012	0.695154	Corse2_OUT_2_0_Mull_surm	0.012	0.695154
521	Mull_surm_(sub-)adult_of_NB_taxa	Mull_surm	(sub-)adult_of_NB_taxa	CA_NB	3	4	Sardinia	IN	1	0	0.004	0.0843215	Sardinia_IN_1_0_Mull_surm	0.004	0.0843215
522	Mull_surm_(sub-)adult_of_NB_taxa	Mull_surm	(sub-)adult_of_NB_taxa	CA_NB	3	4	Sardinia	IN	3	0	0.004	0.912195	Sardinia_IN_3_0_Mull_surm	0.004	0.912195
523	Mull_surm_(sub-)adult_of_NB_taxa	Mull_surm	(sub-)adult_of_NB_taxa	CA_NB	3	4	Corse2	IN	1	0	0.016	0.144555	Corse2_IN_1_0_Mull_surm	0.016	0.144555
524	Mull_surm_(sub-)adult_of_NB_taxa	Mull_surm	(sub-)adult_of_NB_taxa	CA_NB	3	4	Spain	OUT	4	0	0	0	Spain_OUT_4_0_Mull_surm	0	0
525	Mull_surm_(sub-)adult_of_NB_taxa	Mull_surm	(sub-)adult_of_NB_taxa	CA_NB	3	4	Corse2	OUT	4	0	0.002	0.00498581	Corse2_OUT_4_0_Mull_surm	0.002	0.00498581
526	Mull_surm_(sub-)adult_of_NB_taxa	Mull_surm	(sub-)adult_of_NB_taxa	CA_NB	3	4	Corse2	OUT	1	0	0.008	1.31905	Corse2_OUT_1_0_Mull_surm	0.008	1.31905
527	Mull_surm_(sub-)adult_of_NB_taxa	Mull_surm	(sub-)adult_of_NB_taxa	CA_NB	3	4	Sardinia	OUT	3	0	0.002	0.20333	Sardinia_OUT_3_0_Mull_surm	0.002	0.20333
528	Mull_surm_(sub-)adult_of_NB_taxa	Mull_surm	(sub-)adult_of_NB_taxa	CA_NB	3	4	Corse2	IN	3	0	0.01	1.59194	Corse2_IN_3_0_Mull_surm	0.01	1.59194
529	Mull_surm_CB_juvenile_of_NB_taxa	Mull_surm	CB_juvenile_of_NB_taxa	CA_CB	2	3	Corse2	IN	1	1	0	0	Corse2_IN_1_1_Mull_surm	0	0
530	Mull_surm_CB_juvenile_of_NB_taxa	Mull_surm	CB_juvenile_of_NB_taxa	CA_CB	2	3	Sardinia	OUT	4	1	0	0	Sardinia_OUT_4_1_Mull_surm	0	0
531	Mull_surm_CB_juvenile_of_NB_taxa	Mull_surm	CB_juvenile_of_NB_taxa	CA_CB	2	3	Spain	OUT	4	1	0	0	Spain_OUT_4_1_Mull_surm	0	0
532	Mull_surm_CB_juvenile_of_NB_taxa	Mull_surm	CB_juvenile_of_NB_taxa	CA_CB	2	3	Corse2	IN	4	1	0	0	Corse2_IN_4_1_Mull_surm	0	0
533	Mull_surm_CB_juvenile_of_NB_taxa	Mull_surm	CB_juvenile_of_NB_taxa	CA_CB	2	3	Spain	OUT	3	1	0	0	Spain_OUT_3_1_Mull_surm	0	0
534	Mull_surm_CB_juvenile_of_NB_taxa	Mull_surm	CB_juvenile_of_NB_taxa	CA_CB	2	3	Spain	IN	4	1	0	0	Spain_IN_4_1_Mull_surm	0	0
535	Mull_surm_CB_juvenile_of_NB_taxa	Mull_surm	CB_juvenile_of_NB_taxa	CA_CB	2	3	Sardinia	IN	4	1	0	0	Sardinia_IN_4_1_Mull_surm	0	0
536	Mull_surm_CB_juvenile_of_NB_taxa	Mull_surm	CB_juvenile_of_NB_taxa	CA_CB	2	3	Spain	IN	1	1	0	0	Spain_IN_1_1_Mull_surm	0	0
537	Mull_surm_CB_juvenile_of_NB_taxa	Mull_surm	CB_juvenile_of_NB_taxa	CA_CB	2	3	Spain	IN	3	1	0	0	Spain_IN_3_1_Mull_surm	0	0
538	Mull_surm_CB_juvenile_of_NB_taxa	Mull_surm	CB_juvenile_of_NB_taxa	CA_CB	2	3	Sardinia	IN	1	1	0	0	Sardinia_IN_1_1_Mull_surm	0	0
539	Mull_surm_CB_juvenile_of_NB_taxa	Mull_surm	CB_juvenile_of_NB_taxa	CA_CB	2	3	Sardinia	OUT	2	1	0	0	Sardinia_OUT_2_1_Mull_surm	0	0
540	Mull_surm_CB_juvenile_of_NB_taxa	Mull_surm	CB_juvenile_of_NB_taxa	CA_CB	2	3	Corse2	IN	2	1	0	0	Corse2_IN_2_1_Mull_surm	0	0
541	Mull_surm_CB_juvenile_of_NB_taxa	Mull_surm	CB_juvenile_of_NB_taxa	CA_CB	2	3	Corse2	OUT	4	1	0	0	Corse2_OUT_4_1_Mull_surm	0	0
542	Mull_surm_CB_juvenile_of_NB_taxa	Mull_surm	CB_juvenile_of_NB_taxa	CA_CB	2	3	Sardinia	OUT	3	1	0	0	Sardinia_OUT_3_1_Mull_surm	0	0
543	Mull_surm_CB_juvenile_of_NB_taxa	Mull_surm	CB_juvenile_of_NB_taxa	CA_CB	2	3	Corse2	IN	3	1	0	0	Corse2_IN_3_1_Mull_surm	0	0
544	Mull_surm_CB_juvenile_of_NB_taxa	Mull_surm	CB_juvenile_of_NB_taxa	CA_CB	2	3	Corse2	OUT	3	1	0	0	Corse2_OUT_3_1_Mull_surm	0	0
545	Mull_surm_CB_juvenile_of_NB_taxa	Mull_surm	CB_juvenile_of_NB_taxa	CA_CB	2	3	Sardinia	IN	2	1	0	0	Sardinia_IN_2_1_Mull_surm	0	0
546	Mull_surm_CB_juvenile_of_NB_taxa	Mull_surm	CB_juvenile_of_NB_taxa	CA_CB	2	3	Sardinia	IN	3	1	0	0	Sardinia_IN_3_1_Mull_surm	0	0
547	Mull_surm_CB_juvenile_of_NB_taxa	Mull_surm	CB_juvenile_of_NB_taxa	CA_CB	2	3	Spain	OUT	2	1	0	0	Spain_OUT_2_1_Mull_surm	0	0
548	Mull_surm_CB_juvenile_of_NB_taxa	Mull_surm	CB_juvenile_of_NB_taxa	CA_CB	2	3	Spain	IN	2	1	0	0	Spain_IN_2_1_Mull_surm	0	0
549	Mull_surm_CB_juvenile_of_NB_taxa	Mull_surm	CB_juvenile_of_NB_taxa	CA_CB	2	3	Sardinia	OUT	1	1	0	0	Sardinia_OUT_1_1_Mull_surm	0	0
550	Mull_surm_CB_juvenile_of_NB_taxa	Mull_surm	CB_juvenile_of_NB_taxa	CA_CB	2	3	Corse2	OUT	1	1	0	0	Corse2_OUT_1_1_Mull_surm	0	0
551	Mull_surm_CB_juvenile_of_NB_taxa	Mull_surm	CB_juvenile_of_NB_taxa	CA_CB	2	3	Corse2	OUT	2	1	0.075	0.0536298	Corse2_OUT_2_1_Mull_surm	0.075	0.0536298
552	Mull_surm_CB_juvenile_of_NB_taxa	Mull_surm	CB_juvenile_of_NB_taxa	CA_CB	2	3	Spain	OUT	1	1	0	0	Spain_OUT_1_1_Mull_surm	0	0
553	Mura_hele_(sub-)adult_of_NB_taxa	Mura_hele	(sub-)adult_of_NB_taxa	CA_NB	3	4	Sardinia	IN	2	0	0	0	Sardinia_IN_2_0_Mura_hele	0	0
554	Mura_hele_(sub-)adult_of_NB_taxa	Mura_hele	(sub-)adult_of_NB_taxa	CA_NB	3	4	Spain	IN	2	0	0	0	Spain_IN_2_0_Mura_hele	0	0
555	Mura_hele_(sub-)adult_of_NB_taxa	Mura_hele	(sub-)adult_of_NB_taxa	CA_NB	3	4	Corse2	IN	3	0	0	0	Corse2_IN_3_0_Mura_hele	0	0
556	Mura_hele_(sub-)adult_of_NB_taxa	Mura_hele	(sub-)adult_of_NB_taxa	CA_NB	3	4	Corse2	IN	4	0	0	0	Corse2_IN_4_0_Mura_hele	0	0
557	Mura_hele_(sub-)adult_of_NB_taxa	Mura_hele	(sub-)adult_of_NB_taxa	CA_NB	3	4	Spain	OUT	1	0	0	0	Spain_OUT_1_0_Mura_hele	0	0
558	Mura_hele_(sub-)adult_of_NB_taxa	Mura_hele	(sub-)adult_of_NB_taxa	CA_NB	3	4	Spain	OUT	4	0	0.002	2.048	Spain_OUT_4_0_Mura_hele	0.002	2.048
559	Mura_hele_(sub-)adult_of_NB_taxa	Mura_hele	(sub-)adult_of_NB_taxa	CA_NB	3	4	Corse2	OUT	1	0	0	0	Corse2_OUT_1_0_Mura_hele	0	0
560	Mura_hele_(sub-)adult_of_NB_taxa	Mura_hele	(sub-)adult_of_NB_taxa	CA_NB	3	4	Corse2	IN	1	0	0	0	Corse2_IN_1_0_Mura_hele	0	0
561	Mura_hele_(sub-)adult_of_NB_taxa	Mura_hele	(sub-)adult_of_NB_taxa	CA_NB	3	4	Sardinia	OUT	4	0	0	0	Sardinia_OUT_4_0_Mura_hele	0	0
562	Mura_hele_(sub-)adult_of_NB_taxa	Mura_hele	(sub-)adult_of_NB_taxa	CA_NB	3	4	Spain	IN	3	0	0.004	5.832	Spain_IN_3_0_Mura_hele	0.004	5.832
563	Mura_hele_(sub-)adult_of_NB_taxa	Mura_hele	(sub-)adult_of_NB_taxa	CA_NB	3	4	Corse2	OUT	3	0	0.002	2.048	Corse2_OUT_3_0_Mura_hele	0.002	2.048
564	Mura_hele_(sub-)adult_of_NB_taxa	Mura_hele	(sub-)adult_of_NB_taxa	CA_NB	3	4	Sardinia	IN	1	0	0	0	Sardinia_IN_1_0_Mura_hele	0	0
565	Mura_hele_(sub-)adult_of_NB_taxa	Mura_hele	(sub-)adult_of_NB_taxa	CA_NB	3	4	Spain	OUT	3	0	0	0	Spain_OUT_3_0_Mura_hele	0	0
566	Mura_hele_(sub-)adult_of_NB_taxa	Mura_hele	(sub-)adult_of_NB_taxa	CA_NB	3	4	Spain	OUT	2	0	0	0	Spain_OUT_2_0_Mura_hele	0	0
567	Mura_hele_(sub-)adult_of_NB_taxa	Mura_hele	(sub-)adult_of_NB_taxa	CA_NB	3	4	Sardinia	OUT	3	0	0	0	Sardinia_OUT_3_0_Mura_hele	0	0
568	Mura_hele_(sub-)adult_of_NB_taxa	Mura_hele	(sub-)adult_of_NB_taxa	CA_NB	3	4	Spain	IN	4	0	0	0	Spain_IN_4_0_Mura_hele	0	0
569	Mura_hele_(sub-)adult_of_NB_taxa	Mura_hele	(sub-)adult_of_NB_taxa	CA_NB	3	4	Sardinia	IN	4	0	0	0	Sardinia_IN_4_0_Mura_hele	0	0
570	Mura_hele_(sub-)adult_of_NB_taxa	Mura_hele	(sub-)adult_of_NB_taxa	CA_NB	3	4	Spain	IN	1	0	0	0	Spain_IN_1_0_Mura_hele	0	0
571	Mura_hele_(sub-)adult_of_NB_taxa	Mura_hele	(sub-)adult_of_NB_taxa	CA_NB	3	4	Sardinia	OUT	1	0	0	0	Sardinia_OUT_1_0_Mura_hele	0	0
572	Mura_hele_(sub-)adult_of_NB_taxa	Mura_hele	(sub-)adult_of_NB_taxa	CA_NB	3	4	Sardinia	IN	3	0	0	0	Sardinia_IN_3_0_Mura_hele	0	0
573	Mura_hele_(sub-)adult_of_NB_taxa	Mura_hele	(sub-)adult_of_NB_taxa	CA_NB	3	4	Corse2	IN	2	0	0	0	Corse2_IN_2_0_Mura_hele	0	0
574	Mura_hele_(sub-)adult_of_NB_taxa	Mura_hele	(sub-)adult_of_NB_taxa	CA_NB	3	4	Corse2	OUT	4	0	0	0	Corse2_OUT_4_0_Mura_hele	0	0
575	Mura_hele_(sub-)adult_of_NB_taxa	Mura_hele	(sub-)adult_of_NB_taxa	CA_NB	3	4	Sardinia	OUT	2	0	0	0	Sardinia_OUT_2_0_Mura_hele	0	0
576	Mura_hele_(sub-)adult_of_NB_taxa	Mura_hele	(sub-)adult_of_NB_taxa	CA_NB	3	4	Corse2	OUT	2	0	0	0	Corse2_OUT_2_0_Mura_hele	0	0
577	Myct_rubr_(sub-)adult_of_NB_taxa	Myct_rubr	(sub-)adult_of_NB_taxa	TOP	3	5	Spain	OUT	2	0	0	0	Spain_OUT_2_0_Myct_rubr	0	0
578	Myct_rubr_(sub-)adult_of_NB_taxa	Myct_rubr	(sub-)adult_of_NB_taxa	TOP	3	5	Corse2	IN	2	0	0	0	Corse2_IN_2_0_Myct_rubr	0	0
579	Myct_rubr_(sub-)adult_of_NB_taxa	Myct_rubr	(sub-)adult_of_NB_taxa	TOP	3	5	Sardinia	IN	2	0	0	0	Sardinia_IN_2_0_Myct_rubr	0	0
580	Myct_rubr_(sub-)adult_of_NB_taxa	Myct_rubr	(sub-)adult_of_NB_taxa	TOP	3	5	Corse2	IN	4	0	0	0	Corse2_IN_4_0_Myct_rubr	0	0
581	Myct_rubr_(sub-)adult_of_NB_taxa	Myct_rubr	(sub-)adult_of_NB_taxa	TOP	3	5	Spain	OUT	1	0	0	0	Spain_OUT_1_0_Myct_rubr	0	0
582	Myct_rubr_(sub-)adult_of_NB_taxa	Myct_rubr	(sub-)adult_of_NB_taxa	TOP	3	5	Sardinia	IN	4	0	0	0	Sardinia_IN_4_0_Myct_rubr	0	0
583	Myct_rubr_(sub-)adult_of_NB_taxa	Myct_rubr	(sub-)adult_of_NB_taxa	TOP	3	5	Spain	IN	3	0	0	0	Spain_IN_3_0_Myct_rubr	0.00107143	6.09286
584	Myct_rubr_(sub-)adult_of_NB_taxa	Myct_rubr	(sub-)adult_of_NB_taxa	TOP	3	5	Corse2	OUT	4	0	0	0	Corse2_OUT_4_0_Myct_rubr	0	0
585	Myct_rubr_(sub-)adult_of_NB_taxa	Myct_rubr	(sub-)adult_of_NB_taxa	TOP	3	5	Corse2	IN	1	0	0	0	Corse2_IN_1_0_Myct_rubr	0.000714286	3.34286
586	Myct_rubr_(sub-)adult_of_NB_taxa	Myct_rubr	(sub-)adult_of_NB_taxa	TOP	3	5	Sardinia	OUT	4	0	0	0	Sardinia_OUT_4_0_Myct_rubr	0	0
587	Myct_rubr_(sub-)adult_of_NB_taxa	Myct_rubr	(sub-)adult_of_NB_taxa	TOP	3	5	Spain	OUT	4	0	0	0	Spain_OUT_4_0_Myct_rubr	0	0
588	Myct_rubr_(sub-)adult_of_NB_taxa	Myct_rubr	(sub-)adult_of_NB_taxa	TOP	3	5	Spain	IN	1	0	0	0	Spain_IN_1_0_Myct_rubr	0.00767857	53.8821
589	Myct_rubr_(sub-)adult_of_NB_taxa	Myct_rubr	(sub-)adult_of_NB_taxa	TOP	3	5	Sardinia	OUT	3	0	0	0	Sardinia_OUT_3_0_Myct_rubr	0	0
590	Myct_rubr_(sub-)adult_of_NB_taxa	Myct_rubr	(sub-)adult_of_NB_taxa	TOP	3	5	Corse2	IN	3	0	0	0	Corse2_IN_3_0_Myct_rubr	0	0
591	Myct_rubr_(sub-)adult_of_NB_taxa	Myct_rubr	(sub-)adult_of_NB_taxa	TOP	3	5	Sardinia	IN	1	0	0	0	Sardinia_IN_1_0_Myct_rubr	0	0
592	Myct_rubr_(sub-)adult_of_NB_taxa	Myct_rubr	(sub-)adult_of_NB_taxa	TOP	3	5	Spain	IN	2	0	0	0	Spain_IN_2_0_Myct_rubr	0.00142857	14.6286
593	Myct_rubr_(sub-)adult_of_NB_taxa	Myct_rubr	(sub-)adult_of_NB_taxa	TOP	3	5	Spain	OUT	3	0	0	0	Spain_OUT_3_0_Myct_rubr	0	0
594	Myct_rubr_(sub-)adult_of_NB_taxa	Myct_rubr	(sub-)adult_of_NB_taxa	TOP	3	5	Sardinia	OUT	2	0	0	0	Sardinia_OUT_2_0_Myct_rubr	0	0
595	Myct_rubr_(sub-)adult_of_NB_taxa	Myct_rubr	(sub-)adult_of_NB_taxa	TOP	3	5	Spain	IN	4	0	0	0	Spain_IN_4_0_Myct_rubr	0	0
596	Myct_rubr_(sub-)adult_of_NB_taxa	Myct_rubr	(sub-)adult_of_NB_taxa	TOP	3	5	Sardinia	OUT	1	0	0	0	Sardinia_OUT_1_0_Myct_rubr	0	0
597	Myct_rubr_(sub-)adult_of_NB_taxa	Myct_rubr	(sub-)adult_of_NB_taxa	TOP	3	5	Corse2	OUT	3	0	0	0	Corse2_OUT_3_0_Myct_rubr	0	0
598	Myct_rubr_(sub-)adult_of_NB_taxa	Myct_rubr	(sub-)adult_of_NB_taxa	TOP	3	5	Sardinia	IN	3	0	0	0	Sardinia_IN_3_0_Myct_rubr	0	0
599	Myct_rubr_(sub-)adult_of_NB_taxa	Myct_rubr	(sub-)adult_of_NB_taxa	TOP	3	5	Corse2	OUT	2	0	0	0	Corse2_OUT_2_0_Myct_rubr	0	0
600	Myct_rubr_(sub-)adult_of_NB_taxa	Myct_rubr	(sub-)adult_of_NB_taxa	TOP	3	5	Corse2	OUT	1	0	0	0	Corse2_OUT_1_0_Myct_rubr	0	0
601	Obla_mela_(sub-)adult_of_NB_taxa	Obla_mela	(sub-)adult_of_NB_taxa	PLA_SC	3	2	Spain	IN	1	0	0.191	1.96005	Spain_IN_1_0_Obla_mela	0.191	1.96005
602	Obla_mela_(sub-)adult_of_NB_taxa	Obla_mela	(sub-)adult_of_NB_taxa	PLA_SC	3	2	Spain	IN	3	0	0	0	Spain_IN_3_0_Obla_mela	0	0
603	Obla_mela_(sub-)adult_of_NB_taxa	Obla_mela	(sub-)adult_of_NB_taxa	PLA_SC	3	2	Corse2	IN	4	0	0.384	28.4664	Corse2_IN_4_0_Obla_mela	0.384	28.4664
604	Obla_mela_(sub-)adult_of_NB_taxa	Obla_mela	(sub-)adult_of_NB_taxa	PLA_SC	3	2	Sardinia	OUT	3	0	0.008	0.131951	Sardinia_OUT_3_0_Obla_mela	0.008	0.131951
605	Obla_mela_(sub-)adult_of_NB_taxa	Obla_mela	(sub-)adult_of_NB_taxa	PLA_SC	3	2	Sardinia	OUT	2	0	0.008	0.160467	Sardinia_OUT_2_0_Obla_mela	0.008	0.160467
606	Obla_mela_(sub-)adult_of_NB_taxa	Obla_mela	(sub-)adult_of_NB_taxa	PLA_SC	3	2	Corse2	IN	1	0	0.202	15.6756	Corse2_IN_1_0_Obla_mela	0.202	15.6756
607	Obla_mela_(sub-)adult_of_NB_taxa	Obla_mela	(sub-)adult_of_NB_taxa	PLA_SC	3	2	Sardinia	IN	3	0	0.038	3.89801	Sardinia_IN_3_0_Obla_mela	0.038	3.89801
608	Obla_mela_(sub-)adult_of_NB_taxa	Obla_mela	(sub-)adult_of_NB_taxa	PLA_SC	3	2	Spain	OUT	3	0	0.138	7.34362	Spain_OUT_3_0_Obla_mela	0.138	7.34362
609	Obla_mela_(sub-)adult_of_NB_taxa	Obla_mela	(sub-)adult_of_NB_taxa	PLA_SC	3	2	Sardinia	IN	2	0	0.002	1.15695	Sardinia_IN_2_0_Obla_mela	0.002	1.15695
610	Obla_mela_(sub-)adult_of_NB_taxa	Obla_mela	(sub-)adult_of_NB_taxa	PLA_SC	3	2	Corse2	IN	3	0	0.252	6.8518	Corse2_IN_3_0_Obla_mela	0.252	6.8518
611	Obla_mela_(sub-)adult_of_NB_taxa	Obla_mela	(sub-)adult_of_NB_taxa	PLA_SC	3	2	Sardinia	IN	1	0	0.08	0.464029	Sardinia_IN_1_0_Obla_mela	0.08	0.464029
612	Obla_mela_(sub-)adult_of_NB_taxa	Obla_mela	(sub-)adult_of_NB_taxa	PLA_SC	3	2	Spain	OUT	2	0	0.008	0.386988	Spain_OUT_2_0_Obla_mela	0.008	0.386988
613	Obla_mela_(sub-)adult_of_NB_taxa	Obla_mela	(sub-)adult_of_NB_taxa	PLA_SC	3	2	Corse2	OUT	3	0	0.141	0.817852	Corse2_OUT_3_0_Obla_mela	0.141	0.817852
614	Obla_mela_(sub-)adult_of_NB_taxa	Obla_mela	(sub-)adult_of_NB_taxa	PLA_SC	3	2	Corse2	IN	2	0	0.024	0.771548	Corse2_IN_2_0_Obla_mela	0.024	0.771548
615	Obla_mela_(sub-)adult_of_NB_taxa	Obla_mela	(sub-)adult_of_NB_taxa	PLA_SC	3	2	Corse2	OUT	4	0	0.098	3.43995	Corse2_OUT_4_0_Obla_mela	0.098	3.43995
616	Obla_mela_(sub-)adult_of_NB_taxa	Obla_mela	(sub-)adult_of_NB_taxa	PLA_SC	3	2	Sardinia	IN	4	0	0.342	26.3548	Sardinia_IN_4_0_Obla_mela	0.342	26.3548
617	Obla_mela_(sub-)adult_of_NB_taxa	Obla_mela	(sub-)adult_of_NB_taxa	PLA_SC	3	2	Corse2	OUT	1	0	0.264	17.5115	Corse2_OUT_1_0_Obla_mela	0.264	17.5115
618	Obla_mela_(sub-)adult_of_NB_taxa	Obla_mela	(sub-)adult_of_NB_taxa	PLA_SC	3	2	Sardinia	OUT	1	0	0	0	Sardinia_OUT_1_0_Obla_mela	0	0
619	Obla_mela_(sub-)adult_of_NB_taxa	Obla_mela	(sub-)adult_of_NB_taxa	PLA_SC	3	2	Spain	OUT	1	0	0	0	Spain_OUT_1_0_Obla_mela	0	0
620	Obla_mela_(sub-)adult_of_NB_taxa	Obla_mela	(sub-)adult_of_NB_taxa	PLA_SC	3	2	Spain	IN	2	0	0.01	7.98553	Spain_IN_2_0_Obla_mela	0.01	7.98553
621	Obla_mela_(sub-)adult_of_NB_taxa	Obla_mela	(sub-)adult_of_NB_taxa	PLA_SC	3	2	Corse2	OUT	2	0	0.122	7.45222	Corse2_OUT_2_0_Obla_mela	0.122	7.45222
622	Obla_mela_(sub-)adult_of_NB_taxa	Obla_mela	(sub-)adult_of_NB_taxa	PLA_SC	3	2	Sardinia	OUT	4	0	0	0	Sardinia_OUT_4_0_Obla_mela	0	0
623	Obla_mela_(sub-)adult_of_NB_taxa	Obla_mela	(sub-)adult_of_NB_taxa	PLA_SC	3	2	Spain	IN	4	0	0.002	0.191506	Spain_IN_4_0_Obla_mela	0.002	0.191506
624	Obla_mela_(sub-)adult_of_NB_taxa	Obla_mela	(sub-)adult_of_NB_taxa	PLA_SC	3	2	Spain	OUT	4	0	0.002	0.0642957	Spain_OUT_4_0_Obla_mela	0.002	0.0642957
625	Para_gatt_CB_taxa	Para_gatt	CB_taxa	CA_CB	1	3	Spain	OUT	4	1	0	0	Spain_OUT_4_1_Para_gatt	0	0
626	Para_gatt_CB_taxa	Para_gatt	CB_taxa	CA_CB	1	3	Spain	IN	3	1	0	0	Spain_IN_3_1_Para_gatt	0	0
627	Para_gatt_CB_taxa	Para_gatt	CB_taxa	CA_CB	1	3	Sardinia	OUT	2	1	0	0	Sardinia_OUT_2_1_Para_gatt	0	0
628	Para_gatt_CB_taxa	Para_gatt	CB_taxa	CA_CB	1	3	Sardinia	IN	3	1	0	0	Sardinia_IN_3_1_Para_gatt	0	0
629	Para_gatt_CB_taxa	Para_gatt	CB_taxa	CA_CB	1	3	Sardinia	IN	4	1	0	0	Sardinia_IN_4_1_Para_gatt	0	0
630	Para_gatt_CB_taxa	Para_gatt	CB_taxa	CA_CB	1	3	Sardinia	IN	2	1	0	0	Sardinia_IN_2_1_Para_gatt	0	0
631	Para_gatt_CB_taxa	Para_gatt	CB_taxa	CA_CB	1	3	Spain	IN	2	1	0	0	Spain_IN_2_1_Para_gatt	0	0
632	Para_gatt_CB_taxa	Para_gatt	CB_taxa	CA_CB	1	3	Spain	OUT	1	1	0.025	0.682349	Spain_OUT_1_1_Para_gatt	0.025	0.682349
633	Para_gatt_CB_taxa	Para_gatt	CB_taxa	CA_CB	1	3	Sardinia	OUT	1	1	0	0	Sardinia_OUT_1_1_Para_gatt	0	0
634	Para_gatt_CB_taxa	Para_gatt	CB_taxa	CA_CB	1	3	Sardinia	IN	1	1	0	0	Sardinia_IN_1_1_Para_gatt	0	0
635	Para_gatt_CB_taxa	Para_gatt	CB_taxa	CA_CB	1	3	Corse2	IN	1	1	0	0	Corse2_IN_1_1_Para_gatt	0	0
636	Para_gatt_CB_taxa	Para_gatt	CB_taxa	CA_CB	1	3	Spain	OUT	2	1	0.025	0.682349	Spain_OUT_2_1_Para_gatt	0.025	0.682349
637	Para_gatt_CB_taxa	Para_gatt	CB_taxa	CA_CB	1	3	Corse2	IN	4	1	0	0	Corse2_IN_4_1_Para_gatt	0	0
638	Para_gatt_CB_taxa	Para_gatt	CB_taxa	CA_CB	1	3	Corse2	IN	2	1	0	0	Corse2_IN_2_1_Para_gatt	0	0
639	Para_gatt_CB_taxa	Para_gatt	CB_taxa	CA_CB	1	3	Corse2	OUT	3	1	0	0	Corse2_OUT_3_1_Para_gatt	0	0
640	Para_gatt_CB_taxa	Para_gatt	CB_taxa	CA_CB	1	3	Corse2	OUT	1	1	0	0	Corse2_OUT_1_1_Para_gatt	0	0
641	Para_gatt_CB_taxa	Para_gatt	CB_taxa	CA_CB	1	3	Spain	IN	1	1	0	0	Spain_IN_1_1_Para_gatt	0	0
642	Para_gatt_CB_taxa	Para_gatt	CB_taxa	CA_CB	1	3	Corse2	OUT	4	1	0	0	Corse2_OUT_4_1_Para_gatt	0	0
643	Para_gatt_CB_taxa	Para_gatt	CB_taxa	CA_CB	1	3	Corse2	OUT	2	1	0	0	Corse2_OUT_2_1_Para_gatt	0	0
644	Para_gatt_CB_taxa	Para_gatt	CB_taxa	CA_CB	1	3	Sardinia	OUT	4	1	0	0	Sardinia_OUT_4_1_Para_gatt	0	0
645	Para_gatt_CB_taxa	Para_gatt	CB_taxa	CA_CB	1	3	Spain	IN	4	1	0	0	Spain_IN_4_1_Para_gatt	0	0
646	Para_gatt_CB_taxa	Para_gatt	CB_taxa	CA_CB	1	3	Sardinia	OUT	3	1	0	0	Sardinia_OUT_3_1_Para_gatt	0	0
647	Para_gatt_CB_taxa	Para_gatt	CB_taxa	CA_CB	1	3	Corse2	IN	3	1	0	0	Corse2_IN_3_1_Para_gatt	0	0
648	Para_gatt_CB_taxa	Para_gatt	CB_taxa	CA_CB	1	3	Spain	OUT	3	1	0	0	Spain_OUT_3_1_Para_gatt	0	0
649	Para_pili_CB_taxa	Para_pili	CB_taxa	CA_CB	1	3	Corse2	IN	2	1	0	0	Corse2_IN_2_1_Para_pili	0	0
650	Para_pili_CB_taxa	Para_pili	CB_taxa	CA_CB	1	3	Sardinia	OUT	1	1	0	0	Sardinia_OUT_1_1_Para_pili	0	0
651	Para_pili_CB_taxa	Para_pili	CB_taxa	CA_CB	1	3	Spain	OUT	2	1	0.025	0.128	Spain_OUT_2_1_Para_pili	0.025	0.128
652	Para_pili_CB_taxa	Para_pili	CB_taxa	CA_CB	1	3	Corse2	IN	4	1	0.05	0.0625	Corse2_IN_4_1_Para_pili	0.05	0.0625
653	Para_pili_CB_taxa	Para_pili	CB_taxa	CA_CB	1	3	Corse2	OUT	4	1	0.05	0.0625	Corse2_OUT_4_1_Para_pili	0.05	0.0625
654	Para_pili_CB_taxa	Para_pili	CB_taxa	CA_CB	1	3	Spain	OUT	1	1	0.05	0.5	Spain_OUT_1_1_Para_pili	0.05	0.5
655	Para_pili_CB_taxa	Para_pili	CB_taxa	CA_CB	1	3	Sardinia	OUT	2	1	0	0	Sardinia_OUT_2_1_Para_pili	0	0
656	Para_pili_CB_taxa	Para_pili	CB_taxa	CA_CB	1	3	Sardinia	IN	3	1	0	0	Sardinia_IN_3_1_Para_pili	0	0
657	Para_pili_CB_taxa	Para_pili	CB_taxa	CA_CB	1	3	Sardinia	IN	4	1	0	0	Sardinia_IN_4_1_Para_pili	0	0
658	Para_pili_CB_taxa	Para_pili	CB_taxa	CA_CB	1	3	Spain	IN	1	1	0	0	Spain_IN_1_1_Para_pili	0	0
659	Para_pili_CB_taxa	Para_pili	CB_taxa	CA_CB	1	3	Spain	IN	4	1	0.025	0.128	Spain_IN_4_1_Para_pili	0.025	0.128
660	Para_pili_CB_taxa	Para_pili	CB_taxa	CA_CB	1	3	Spain	OUT	4	1	0	0	Spain_OUT_4_1_Para_pili	0	0
661	Para_pili_CB_taxa	Para_pili	CB_taxa	CA_CB	1	3	Corse2	IN	3	1	0	0	Corse2_IN_3_1_Para_pili	0	0
662	Para_pili_CB_taxa	Para_pili	CB_taxa	CA_CB	1	3	Spain	IN	3	1	0.05	0.682	Spain_IN_3_1_Para_pili	0.05	0.682
663	Para_pili_CB_taxa	Para_pili	CB_taxa	CA_CB	1	3	Corse2	IN	1	1	0.025	0.03125	Corse2_IN_1_1_Para_pili	0.025	0.03125
664	Para_pili_CB_taxa	Para_pili	CB_taxa	CA_CB	1	3	Spain	IN	2	1	0.025	0.128	Spain_IN_2_1_Para_pili	0.025	0.128
665	Para_pili_CB_taxa	Para_pili	CB_taxa	CA_CB	1	3	Corse2	OUT	3	1	0.025	0.03125	Corse2_OUT_3_1_Para_pili	0.025	0.03125
666	Para_pili_CB_taxa	Para_pili	CB_taxa	CA_CB	1	3	Corse2	OUT	2	1	0.025	0.016	Corse2_OUT_2_1_Para_pili	0.025	0.016
667	Para_pili_CB_taxa	Para_pili	CB_taxa	CA_CB	1	3	Sardinia	IN	2	1	0	0	Sardinia_IN_2_1_Para_pili	0	0
668	Para_pili_CB_taxa	Para_pili	CB_taxa	CA_CB	1	3	Sardinia	IN	1	1	0	0	Sardinia_IN_1_1_Para_pili	0	0
669	Para_pili_CB_taxa	Para_pili	CB_taxa	CA_CB	1	3	Spain	OUT	3	1	0	0	Spain_OUT_3_1_Para_pili	0	0
670	Para_pili_CB_taxa	Para_pili	CB_taxa	CA_CB	1	3	Sardinia	OUT	3	1	0	0	Sardinia_OUT_3_1_Para_pili	0	0
671	Para_pili_CB_taxa	Para_pili	CB_taxa	CA_CB	1	3	Sardinia	OUT	4	1	0	0	Sardinia_OUT_4_1_Para_pili	0	0
672	Para_pili_CB_taxa	Para_pili	CB_taxa	CA_CB	1	3	Corse2	OUT	1	1	0	0	Corse2_OUT_1_1_Para_pili	0	0
673	Para_roux_CB_taxa	Para_roux	CB_taxa	CA_CB	1	3	Sardinia	OUT	4	1	0	0	Sardinia_OUT_4_1_Para_roux	0	0
674	Para_roux_CB_taxa	Para_roux	CB_taxa	CA_CB	1	3	Sardinia	IN	3	1	0.225	0.324727	Sardinia_IN_3_1_Para_roux	0.225	0.324727
675	Para_roux_CB_taxa	Para_roux	CB_taxa	CA_CB	1	3	Sardinia	IN	2	1	0.125	0.130465	Sardinia_IN_2_1_Para_roux	0.125	0.130465
676	Para_roux_CB_taxa	Para_roux	CB_taxa	CA_CB	1	3	Spain	OUT	3	1	0.1	0.201061	Spain_OUT_3_1_Para_roux	0.1	0.201061
677	Para_roux_CB_taxa	Para_roux	CB_taxa	CA_CB	1	3	Spain	OUT	2	1	0.15	0.348147	Spain_OUT_2_1_Para_roux	0.15	0.348147
678	Para_roux_CB_taxa	Para_roux	CB_taxa	CA_CB	1	3	Corse2	OUT	1	1	0	0	Corse2_OUT_1_1_Para_roux	0	0
679	Para_roux_CB_taxa	Para_roux	CB_taxa	CA_CB	1	3	Spain	IN	4	1	0.05	0.0654022	Spain_IN_4_1_Para_roux	0.05	0.0654022
680	Para_roux_CB_taxa	Para_roux	CB_taxa	CA_CB	1	3	Corse2	OUT	4	1	0.25	0.193863	Corse2_OUT_4_1_Para_roux	0.25	0.193863
681	Para_roux_CB_taxa	Para_roux	CB_taxa	CA_CB	1	3	Corse2	IN	4	1	0.125	0.383626	Corse2_IN_4_1_Para_roux	0.125	0.383626
682	Para_roux_CB_taxa	Para_roux	CB_taxa	CA_CB	1	3	Corse2	IN	1	1	0	0	Corse2_IN_1_1_Para_roux	0	0
683	Para_roux_CB_taxa	Para_roux	CB_taxa	CA_CB	1	3	Corse2	IN	2	1	0.05	0.10053	Corse2_IN_2_1_Para_roux	0.05	0.10053
684	Para_roux_CB_taxa	Para_roux	CB_taxa	CA_CB	1	3	Spain	IN	3	1	0	0	Spain_IN_3_1_Para_roux	0	0
685	Para_roux_CB_taxa	Para_roux	CB_taxa	CA_CB	1	3	Spain	OUT	1	1	0	0	Spain_OUT_1_1_Para_roux	0	0
686	Para_roux_CB_taxa	Para_roux	CB_taxa	CA_CB	1	3	Sardinia	OUT	3	1	0	0	Sardinia_OUT_3_1_Para_roux	0	0
687	Para_roux_CB_taxa	Para_roux	CB_taxa	CA_CB	1	3	Sardinia	OUT	1	1	0.05	0.0302738	Sardinia_OUT_1_1_Para_roux	0.05	0.0302738
688	Para_roux_CB_taxa	Para_roux	CB_taxa	CA_CB	1	3	Spain	IN	1	1	0	0	Spain_IN_1_1_Para_roux	0	0
689	Para_roux_CB_taxa	Para_roux	CB_taxa	CA_CB	1	3	Sardinia	OUT	2	1	0	0	Sardinia_OUT_2_1_Para_roux	0	0
690	Para_roux_CB_taxa	Para_roux	CB_taxa	CA_CB	1	3	Corse2	OUT	3	1	0.1	0.088877	Corse2_OUT_3_1_Para_roux	0.1	0.088877
691	Para_roux_CB_taxa	Para_roux	CB_taxa	CA_CB	1	3	Sardinia	IN	4	1	0.25	0.270919	Sardinia_IN_4_1_Para_roux	0.25	0.270919
692	Para_roux_CB_taxa	Para_roux	CB_taxa	CA_CB	1	3	Sardinia	IN	1	1	0.025	0.0064598	Sardinia_IN_1_1_Para_roux	0.025	0.0064598
693	Para_roux_CB_taxa	Para_roux	CB_taxa	CA_CB	1	3	Corse2	OUT	2	1	0.125	0.189169	Corse2_OUT_2_1_Para_roux	0.125	0.189169
694	Para_roux_CB_taxa	Para_roux	CB_taxa	CA_CB	1	3	Spain	IN	2	1	0.025	0.0151369	Spain_IN_2_1_Para_roux	0.025	0.0151369
695	Para_roux_CB_taxa	Para_roux	CB_taxa	CA_CB	1	3	Spain	OUT	4	1	0	0	Spain_OUT_4_1_Para_roux	0	0
696	Para_roux_CB_taxa	Para_roux	CB_taxa	CA_CB	1	3	Corse2	IN	3	1	0.1	0.122127	Corse2_IN_3_1_Para_roux	0.1	0.122127
697	Para_tent_CB_taxa	Para_tent	CB_taxa	CA_CB	1	3	Corse2	OUT	2	1	0	0	Corse2_OUT_2_1_Para_tent	0	0
698	Para_tent_CB_taxa	Para_tent	CB_taxa	CA_CB	1	3	Spain	OUT	1	1	0	0	Spain_OUT_1_1_Para_tent	0	0
699	Para_tent_CB_taxa	Para_tent	CB_taxa	CA_CB	1	3	Spain	OUT	4	1	0	0	Spain_OUT_4_1_Para_tent	0	0
700	Para_tent_CB_taxa	Para_tent	CB_taxa	CA_CB	1	3	Sardinia	IN	3	1	0	0	Sardinia_IN_3_1_Para_tent	0	0
701	Para_tent_CB_taxa	Para_tent	CB_taxa	CA_CB	1	3	Sardinia	OUT	4	1	0	0	Sardinia_OUT_4_1_Para_tent	0	0
702	Para_tent_CB_taxa	Para_tent	CB_taxa	CA_CB	1	3	Spain	IN	2	1	0	0	Spain_IN_2_1_Para_tent	0	0
703	Para_tent_CB_taxa	Para_tent	CB_taxa	CA_CB	1	3	Corse2	OUT	4	1	0	0	Corse2_OUT_4_1_Para_tent	0	0
704	Para_tent_CB_taxa	Para_tent	CB_taxa	CA_CB	1	3	Corse2	IN	4	1	0	0	Corse2_IN_4_1_Para_tent	0	0
705	Para_tent_CB_taxa	Para_tent	CB_taxa	CA_CB	1	3	Spain	IN	3	1	0	0	Spain_IN_3_1_Para_tent	0	0
706	Para_tent_CB_taxa	Para_tent	CB_taxa	CA_CB	1	3	Corse2	OUT	1	1	0.025	0.0151369	Corse2_OUT_1_1_Para_tent	0.025	0.0151369
707	Para_tent_CB_taxa	Para_tent	CB_taxa	CA_CB	1	3	Sardinia	IN	2	1	0	0	Sardinia_IN_2_1_Para_tent	0	0
708	Para_tent_CB_taxa	Para_tent	CB_taxa	CA_CB	1	3	Corse2	IN	3	1	0	0	Corse2_IN_3_1_Para_tent	0	0
709	Para_tent_CB_taxa	Para_tent	CB_taxa	CA_CB	1	3	Spain	IN	4	1	0	0	Spain_IN_4_1_Para_tent	0	0
710	Para_tent_CB_taxa	Para_tent	CB_taxa	CA_CB	1	3	Corse2	IN	2	1	0	0	Corse2_IN_2_1_Para_tent	0	0
711	Para_tent_CB_taxa	Para_tent	CB_taxa	CA_CB	1	3	Spain	IN	1	1	0	0	Spain_IN_1_1_Para_tent	0	0
712	Para_tent_CB_taxa	Para_tent	CB_taxa	CA_CB	1	3	Sardinia	OUT	2	1	0	0	Sardinia_OUT_2_1_Para_tent	0	0
713	Para_tent_CB_taxa	Para_tent	CB_taxa	CA_CB	1	3	Corse2	IN	1	1	0	0	Corse2_IN_1_1_Para_tent	0	0
714	Para_tent_CB_taxa	Para_tent	CB_taxa	CA_CB	1	3	Spain	OUT	3	1	0	0	Spain_OUT_3_1_Para_tent	0	0
715	Para_tent_CB_taxa	Para_tent	CB_taxa	CA_CB	1	3	Sardinia	IN	4	1	0	0	Sardinia_IN_4_1_Para_tent	0	0
716	Para_tent_CB_taxa	Para_tent	CB_taxa	CA_CB	1	3	Sardinia	OUT	1	1	0	0	Sardinia_OUT_1_1_Para_tent	0	0
717	Para_tent_CB_taxa	Para_tent	CB_taxa	CA_CB	1	3	Sardinia	IN	1	1	0	0	Sardinia_IN_1_1_Para_tent	0	0
718	Para_tent_CB_taxa	Para_tent	CB_taxa	CA_CB	1	3	Sardinia	OUT	3	1	0	0	Sardinia_OUT_3_1_Para_tent	0	0
719	Para_tent_CB_taxa	Para_tent	CB_taxa	CA_CB	1	3	Spain	OUT	2	1	0	0	Spain_OUT_2_1_Para_tent	0	0
720	Para_tent_CB_taxa	Para_tent	CB_taxa	CA_CB	1	3	Corse2	OUT	3	1	0	0	Corse2_OUT_3_1_Para_tent	0	0
721	Para_zvon_CB_taxa	Para_zvon	CB_taxa	CA_CB	1	3	Corse2	OUT	3	1	0	0	Corse2_OUT_3_1_Para_zvon	0	0
722	Para_zvon_CB_taxa	Para_zvon	CB_taxa	CA_CB	1	3	Corse2	IN	3	1	0	0	Corse2_IN_3_1_Para_zvon	0	0
723	Para_zvon_CB_taxa	Para_zvon	CB_taxa	CA_CB	1	3	Spain	OUT	3	1	0	0	Spain_OUT_3_1_Para_zvon	0	0
724	Para_zvon_CB_taxa	Para_zvon	CB_taxa	CA_CB	1	3	Sardinia	OUT	2	1	0	0	Sardinia_OUT_2_1_Para_zvon	0	0
725	Para_zvon_CB_taxa	Para_zvon	CB_taxa	CA_CB	1	3	Spain	OUT	1	1	0	0	Spain_OUT_1_1_Para_zvon	0	0
726	Para_zvon_CB_taxa	Para_zvon	CB_taxa	CA_CB	1	3	Sardinia	OUT	4	1	0	0	Sardinia_OUT_4_1_Para_zvon	0	0
727	Para_zvon_CB_taxa	Para_zvon	CB_taxa	CA_CB	1	3	Sardinia	OUT	3	1	0	0	Sardinia_OUT_3_1_Para_zvon	0	0
728	Para_zvon_CB_taxa	Para_zvon	CB_taxa	CA_CB	1	3	Spain	IN	1	1	0	0	Spain_IN_1_1_Para_zvon	0	0
729	Para_zvon_CB_taxa	Para_zvon	CB_taxa	CA_CB	1	3	Corse2	OUT	4	1	0	0	Corse2_OUT_4_1_Para_zvon	0	0
730	Para_zvon_CB_taxa	Para_zvon	CB_taxa	CA_CB	1	3	Sardinia	IN	1	1	0.15	0.0495	Sardinia_IN_1_1_Para_zvon	0.15	0.0495
731	Para_zvon_CB_taxa	Para_zvon	CB_taxa	CA_CB	1	3	Spain	IN	3	1	0	0	Spain_IN_3_1_Para_zvon	0	0
732	Para_zvon_CB_taxa	Para_zvon	CB_taxa	CA_CB	1	3	Spain	IN	4	1	0	0	Spain_IN_4_1_Para_zvon	0	0
733	Para_zvon_CB_taxa	Para_zvon	CB_taxa	CA_CB	1	3	Spain	OUT	4	1	0	0	Spain_OUT_4_1_Para_zvon	0	0
734	Para_zvon_CB_taxa	Para_zvon	CB_taxa	CA_CB	1	3	Corse2	OUT	2	1	0	0	Corse2_OUT_2_1_Para_zvon	0	0
735	Para_zvon_CB_taxa	Para_zvon	CB_taxa	CA_CB	1	3	Spain	OUT	2	1	0	0	Spain_OUT_2_1_Para_zvon	0	0
736	Para_zvon_CB_taxa	Para_zvon	CB_taxa	CA_CB	1	3	Sardinia	IN	4	1	0	0	Sardinia_IN_4_1_Para_zvon	0	0
737	Para_zvon_CB_taxa	Para_zvon	CB_taxa	CA_CB	1	3	Corse2	OUT	1	1	0	0	Corse2_OUT_1_1_Para_zvon	0	0
738	Para_zvon_CB_taxa	Para_zvon	CB_taxa	CA_CB	1	3	Sardinia	IN	3	1	0	0	Sardinia_IN_3_1_Para_zvon	0	0
739	Para_zvon_CB_taxa	Para_zvon	CB_taxa	CA_CB	1	3	Sardinia	OUT	1	1	0	0	Sardinia_OUT_1_1_Para_zvon	0	0
740	Para_zvon_CB_taxa	Para_zvon	CB_taxa	CA_CB	1	3	Sardinia	IN	2	1	0	0	Sardinia_IN_2_1_Para_zvon	0	0
741	Para_zvon_CB_taxa	Para_zvon	CB_taxa	CA_CB	1	3	Corse2	IN	2	1	0	0	Corse2_IN_2_1_Para_zvon	0	0
742	Para_zvon_CB_taxa	Para_zvon	CB_taxa	CA_CB	1	3	Corse2	IN	4	1	0	0	Corse2_IN_4_1_Para_zvon	0	0
743	Para_zvon_CB_taxa	Para_zvon	CB_taxa	CA_CB	1	3	Spain	IN	2	1	0	0	Spain_IN_2_1_Para_zvon	0	0
744	Para_zvon_CB_taxa	Para_zvon	CB_taxa	CA_CB	1	3	Corse2	IN	1	1	0.025	0.054	Corse2_IN_1_1_Para_zvon	0.025	0.054
745	Sarp_salp_(sub-)adult_of_NB_taxa	Sarp_salp	(sub-)adult_of_NB_taxa	HE	3	1	Spain	IN	2	0	0.122	37.329	Spain_IN_2_0_Sarp_salp	0.122	37.329
746	Sarp_salp_(sub-)adult_of_NB_taxa	Sarp_salp	(sub-)adult_of_NB_taxa	HE	3	1	Sardinia	IN	4	0	0.138	40.4132	Sardinia_IN_4_0_Sarp_salp	0.138	40.4132
747	Sarp_salp_(sub-)adult_of_NB_taxa	Sarp_salp	(sub-)adult_of_NB_taxa	HE	3	1	Corse2	IN	2	0	0.201	45.0722	Corse2_IN_2_0_Sarp_salp	0.201	45.0722
748	Sarp_salp_(sub-)adult_of_NB_taxa	Sarp_salp	(sub-)adult_of_NB_taxa	HE	3	1	Spain	IN	4	0	0.061	40.5008	Spain_IN_4_0_Sarp_salp	0.061	40.5008
749	Sarp_salp_(sub-)adult_of_NB_taxa	Sarp_salp	(sub-)adult_of_NB_taxa	HE	3	1	Spain	IN	1	0	0	0	Spain_IN_1_0_Sarp_salp	0	0
750	Sarp_salp_(sub-)adult_of_NB_taxa	Sarp_salp	(sub-)adult_of_NB_taxa	HE	3	1	Spain	OUT	3	0	0.219	28.1031	Spain_OUT_3_0_Sarp_salp	0.219	28.1031
751	Sarp_salp_(sub-)adult_of_NB_taxa	Sarp_salp	(sub-)adult_of_NB_taxa	HE	3	1	Corse2	IN	1	0	0	0	Corse2_IN_1_0_Sarp_salp	0	0
752	Sarp_salp_(sub-)adult_of_NB_taxa	Sarp_salp	(sub-)adult_of_NB_taxa	HE	3	1	Sardinia	OUT	1	0	0.08	4.24626	Sardinia_OUT_1_0_Sarp_salp	0.08	4.24626
753	Sarp_salp_(sub-)adult_of_NB_taxa	Sarp_salp	(sub-)adult_of_NB_taxa	HE	3	1	Spain	OUT	2	0	0.049	5.18244	Spain_OUT_2_0_Sarp_salp	0.049	5.18244
754	Sarp_salp_(sub-)adult_of_NB_taxa	Sarp_salp	(sub-)adult_of_NB_taxa	HE	3	1	Sardinia	OUT	4	0	0	0	Sardinia_OUT_4_0_Sarp_salp	0	0
755	Sarp_salp_(sub-)adult_of_NB_taxa	Sarp_salp	(sub-)adult_of_NB_taxa	HE	3	1	Corse2	OUT	2	0	0.049	5.48099	Corse2_OUT_2_0_Sarp_salp	0.049	5.48099
756	Sarp_salp_(sub-)adult_of_NB_taxa	Sarp_salp	(sub-)adult_of_NB_taxa	HE	3	1	Corse2	IN	3	0	0	0	Corse2_IN_3_0_Sarp_salp	0	0
757	Sarp_salp_(sub-)adult_of_NB_taxa	Sarp_salp	(sub-)adult_of_NB_taxa	HE	3	1	Spain	OUT	4	0	0.098	5.39853	Spain_OUT_4_0_Sarp_salp	0.098	5.39853
758	Sarp_salp_(sub-)adult_of_NB_taxa	Sarp_salp	(sub-)adult_of_NB_taxa	HE	3	1	Spain	OUT	1	0	0.191	34.6276	Spain_OUT_1_0_Sarp_salp	0.191	34.6276
759	Sarp_salp_(sub-)adult_of_NB_taxa	Sarp_salp	(sub-)adult_of_NB_taxa	HE	3	1	Sardinia	IN	2	0	0	0	Sardinia_IN_2_0_Sarp_salp	0	0
760	Sarp_salp_(sub-)adult_of_NB_taxa	Sarp_salp	(sub-)adult_of_NB_taxa	HE	3	1	Corse2	OUT	4	0	0.168	28.4221	Corse2_OUT_4_0_Sarp_salp	0.168	28.4221
761	Sarp_salp_(sub-)adult_of_NB_taxa	Sarp_salp	(sub-)adult_of_NB_taxa	HE	3	1	Sardinia	OUT	2	0	0.128	8.52855	Sardinia_OUT_2_0_Sarp_salp	0.128	8.52855
762	Sarp_salp_(sub-)adult_of_NB_taxa	Sarp_salp	(sub-)adult_of_NB_taxa	HE	3	1	Sardinia	OUT	3	0	0.212	10.0716	Sardinia_OUT_3_0_Sarp_salp	0.212	10.0716
763	Sarp_salp_(sub-)adult_of_NB_taxa	Sarp_salp	(sub-)adult_of_NB_taxa	HE	3	1	Corse2	OUT	3	0	0	0	Corse2_OUT_3_0_Sarp_salp	0	0
764	Sarp_salp_(sub-)adult_of_NB_taxa	Sarp_salp	(sub-)adult_of_NB_taxa	HE	3	1	Spain	IN	3	0	0	0	Spain_IN_3_0_Sarp_salp	0	0
765	Sarp_salp_(sub-)adult_of_NB_taxa	Sarp_salp	(sub-)adult_of_NB_taxa	HE	3	1	Sardinia	IN	3	0	0.13	23.3365	Sardinia_IN_3_0_Sarp_salp	0.13	23.3365
766	Sarp_salp_(sub-)adult_of_NB_taxa	Sarp_salp	(sub-)adult_of_NB_taxa	HE	3	1	Sardinia	IN	1	0	0	0	Sardinia_IN_1_0_Sarp_salp	0	0
767	Sarp_salp_(sub-)adult_of_NB_taxa	Sarp_salp	(sub-)adult_of_NB_taxa	HE	3	1	Corse2	IN	4	0	0	0	Corse2_IN_4_0_Sarp_salp	0	0
768	Sarp_salp_(sub-)adult_of_NB_taxa	Sarp_salp	(sub-)adult_of_NB_taxa	HE	3	1	Corse2	OUT	1	0	0.034	2.32499	Corse2_OUT_1_0_Sarp_salp	0.034	2.32499
769	Scia_umbr_(sub-)adult_of_NB_taxa	Scia_umbr	(sub-)adult_of_NB_taxa	CA_NB	3	4	Corse2	OUT	4	0	0	0	Corse2_OUT_4_0_Scia_umbr	0	0
770	Scia_umbr_(sub-)adult_of_NB_taxa	Scia_umbr	(sub-)adult_of_NB_taxa	CA_NB	3	4	Spain	IN	1	0	0.008	1.70965	Spain_IN_1_0_Scia_umbr	0.0214286	8.05267
771	Scia_umbr_(sub-)adult_of_NB_taxa	Scia_umbr	(sub-)adult_of_NB_taxa	CA_NB	3	4	Corse2	IN	2	0	0	0	Corse2_IN_2_0_Scia_umbr	0	0
772	Scia_umbr_(sub-)adult_of_NB_taxa	Scia_umbr	(sub-)adult_of_NB_taxa	CA_NB	3	4	Spain	IN	3	0	0	0	Spain_IN_3_0_Scia_umbr	0	0
773	Scia_umbr_(sub-)adult_of_NB_taxa	Scia_umbr	(sub-)adult_of_NB_taxa	CA_NB	3	4	Spain	OUT	2	0	0	0	Spain_OUT_2_0_Scia_umbr	0	0
774	Scia_umbr_(sub-)adult_of_NB_taxa	Scia_umbr	(sub-)adult_of_NB_taxa	CA_NB	3	4	Spain	OUT	4	0	0	0	Spain_OUT_4_0_Scia_umbr	0	0
775	Scia_umbr_(sub-)adult_of_NB_taxa	Scia_umbr	(sub-)adult_of_NB_taxa	CA_NB	3	4	Spain	OUT	3	0	0	0	Spain_OUT_3_0_Scia_umbr	0.00285714	0.849607
776	Scia_umbr_(sub-)adult_of_NB_taxa	Scia_umbr	(sub-)adult_of_NB_taxa	CA_NB	3	4	Sardinia	OUT	3	0	0	0	Sardinia_OUT_3_0_Scia_umbr	0	0
777	Scia_umbr_(sub-)adult_of_NB_taxa	Scia_umbr	(sub-)adult_of_NB_taxa	CA_NB	3	4	Corse2	IN	3	0	0.03	11.6018	Corse2_IN_3_0_Scia_umbr	0.00342857	1.75469
778	Scia_umbr_(sub-)adult_of_NB_taxa	Scia_umbr	(sub-)adult_of_NB_taxa	CA_NB	3	4	Sardinia	OUT	2	0	0	0	Sardinia_OUT_2_0_Scia_umbr	0	0
779	Scia_umbr_(sub-)adult_of_NB_taxa	Scia_umbr	(sub-)adult_of_NB_taxa	CA_NB	3	4	Sardinia	OUT	4	0	0	0	Sardinia_OUT_4_0_Scia_umbr	0	0
780	Scia_umbr_(sub-)adult_of_NB_taxa	Scia_umbr	(sub-)adult_of_NB_taxa	CA_NB	3	4	Corse2	OUT	3	0	0	0	Corse2_OUT_3_0_Scia_umbr	0	0
781	Scia_umbr_(sub-)adult_of_NB_taxa	Scia_umbr	(sub-)adult_of_NB_taxa	CA_NB	3	4	Corse2	OUT	1	0	0.004	0.526068	Corse2_OUT_1_0_Scia_umbr	0.004	0.526068
782	Scia_umbr_(sub-)adult_of_NB_taxa	Scia_umbr	(sub-)adult_of_NB_taxa	CA_NB	3	4	Corse2	OUT	2	0	0	0	Corse2_OUT_2_0_Scia_umbr	0	0
783	Scia_umbr_(sub-)adult_of_NB_taxa	Scia_umbr	(sub-)adult_of_NB_taxa	CA_NB	3	4	Sardinia	IN	1	0	0	0	Sardinia_IN_1_0_Scia_umbr	0	0
784	Scia_umbr_(sub-)adult_of_NB_taxa	Scia_umbr	(sub-)adult_of_NB_taxa	CA_NB	3	4	Spain	IN	4	0	0	0	Spain_IN_4_0_Scia_umbr	0.0176786	3.81997
785	Scia_umbr_(sub-)adult_of_NB_taxa	Scia_umbr	(sub-)adult_of_NB_taxa	CA_NB	3	4	Corse2	IN	1	0	0.022	6.34539	Corse2_IN_1_0_Scia_umbr	0.00392857	1.13311
786	Scia_umbr_(sub-)adult_of_NB_taxa	Scia_umbr	(sub-)adult_of_NB_taxa	CA_NB	3	4	Sardinia	IN	3	0	0	0	Sardinia_IN_3_0_Scia_umbr	0	0
787	Scia_umbr_(sub-)adult_of_NB_taxa	Scia_umbr	(sub-)adult_of_NB_taxa	CA_NB	3	4	Sardinia	IN	2	0	0	0	Sardinia_IN_2_0_Scia_umbr	0	0
788	Scia_umbr_(sub-)adult_of_NB_taxa	Scia_umbr	(sub-)adult_of_NB_taxa	CA_NB	3	4	Spain	IN	2	0	0	0	Spain_IN_2_0_Scia_umbr	0.00214286	3.3872
789	Scia_umbr_(sub-)adult_of_NB_taxa	Scia_umbr	(sub-)adult_of_NB_taxa	CA_NB	3	4	Sardinia	IN	4	0	0	0	Sardinia_IN_4_0_Scia_umbr	0	0
790	Scia_umbr_(sub-)adult_of_NB_taxa	Scia_umbr	(sub-)adult_of_NB_taxa	CA_NB	3	4	Sardinia	OUT	1	0	0	0	Sardinia_OUT_1_0_Scia_umbr	0	0
791	Scia_umbr_(sub-)adult_of_NB_taxa	Scia_umbr	(sub-)adult_of_NB_taxa	CA_NB	3	4	Spain	OUT	1	0	0	0	Spain_OUT_1_0_Scia_umbr	0	0
792	Scia_umbr_(sub-)adult_of_NB_taxa	Scia_umbr	(sub-)adult_of_NB_taxa	CA_NB	3	4	Corse2	IN	4	0	0	0	Corse2_IN_4_0_Scia_umbr	0	0
793	Scor_inde_CB_taxa	Scor_inde	CB_taxa	CA_CB	1	3	Sardinia	IN	4	1	0	0	Sardinia_IN_4_1_Scor_inde	0	0
794	Scor_inde_CB_taxa	Scor_inde	CB_taxa	CA_CB	1	3	Corse2	IN	4	1	0	0	Corse2_IN_4_1_Scor_inde	0	0
795	Scor_inde_CB_taxa	Scor_inde	CB_taxa	CA_CB	1	3	Sardinia	OUT	3	1	0	0	Sardinia_OUT_3_1_Scor_inde	0	0
796	Scor_inde_CB_taxa	Scor_inde	CB_taxa	CA_CB	1	3	Spain	OUT	4	1	0	0	Spain_OUT_4_1_Scor_inde	0	0
797	Scor_inde_CB_taxa	Scor_inde	CB_taxa	CA_CB	1	3	Corse2	OUT	2	1	0	0	Corse2_OUT_2_1_Scor_inde	0	0
798	Scor_inde_CB_taxa	Scor_inde	CB_taxa	CA_CB	1	3	Spain	IN	3	1	0	0	Spain_IN_3_1_Scor_inde	0	0
799	Scor_inde_CB_taxa	Scor_inde	CB_taxa	CA_CB	1	3	Corse2	OUT	1	1	0	0	Corse2_OUT_1_1_Scor_inde	0	0
800	Scor_inde_CB_taxa	Scor_inde	CB_taxa	CA_CB	1	3	Corse2	IN	1	1	0.025	1.23455	Corse2_IN_1_1_Scor_inde	0.025	1.23455
801	Scor_inde_CB_taxa	Scor_inde	CB_taxa	CA_CB	1	3	Corse2	IN	3	1	0	0	Corse2_IN_3_1_Scor_inde	0	0
802	Scor_inde_CB_taxa	Scor_inde	CB_taxa	CA_CB	1	3	Spain	IN	1	1	0	0	Spain_IN_1_1_Scor_inde	0	0
803	Scor_inde_CB_taxa	Scor_inde	CB_taxa	CA_CB	1	3	Sardinia	OUT	2	1	0	0	Sardinia_OUT_2_1_Scor_inde	0	0
804	Scor_inde_CB_taxa	Scor_inde	CB_taxa	CA_CB	1	3	Spain	OUT	1	1	0.025	1.23455	Spain_OUT_1_1_Scor_inde	0.025	1.23455
805	Scor_inde_CB_taxa	Scor_inde	CB_taxa	CA_CB	1	3	Corse2	IN	2	1	0	0	Corse2_IN_2_1_Scor_inde	0	0
806	Scor_inde_CB_taxa	Scor_inde	CB_taxa	CA_CB	1	3	Sardinia	OUT	4	1	0	0	Sardinia_OUT_4_1_Scor_inde	0	0
807	Scor_inde_CB_taxa	Scor_inde	CB_taxa	CA_CB	1	3	Spain	OUT	3	1	0	0	Spain_OUT_3_1_Scor_inde	0	0
808	Scor_inde_CB_taxa	Scor_inde	CB_taxa	CA_CB	1	3	Sardinia	IN	1	1	0	0	Sardinia_IN_1_1_Scor_inde	0	0
809	Scor_inde_CB_taxa	Scor_inde	CB_taxa	CA_CB	1	3	Spain	IN	4	1	0	0	Spain_IN_4_1_Scor_inde	0	0
810	Scor_inde_CB_taxa	Scor_inde	CB_taxa	CA_CB	1	3	Corse2	OUT	4	1	0	0	Corse2_OUT_4_1_Scor_inde	0	0
811	Scor_inde_CB_taxa	Scor_inde	CB_taxa	CA_CB	1	3	Sardinia	IN	3	1	0	0	Sardinia_IN_3_1_Scor_inde	0	0
812	Scor_inde_CB_taxa	Scor_inde	CB_taxa	CA_CB	1	3	Corse2	OUT	3	1	0	0	Corse2_OUT_3_1_Scor_inde	0	0
813	Scor_inde_CB_taxa	Scor_inde	CB_taxa	CA_CB	1	3	Sardinia	OUT	1	1	0	0	Sardinia_OUT_1_1_Scor_inde	0	0
814	Scor_inde_CB_taxa	Scor_inde	CB_taxa	CA_CB	1	3	Spain	OUT	2	1	0	0	Spain_OUT_2_1_Scor_inde	0	0
815	Scor_inde_CB_taxa	Scor_inde	CB_taxa	CA_CB	1	3	Sardinia	IN	2	1	0	0	Sardinia_IN_2_1_Scor_inde	0	0
816	Scor_inde_CB_taxa	Scor_inde	CB_taxa	CA_CB	1	3	Spain	IN	2	1	0	0	Spain_IN_2_1_Scor_inde	0	0
817	Scor_scro_CB_taxa	Scor_scro	CB_taxa	CA_CB	1	3	Sardinia	IN	4	1	0	0	Sardinia_IN_4_1_Scor_scro	0	0
818	Scor_scro_CB_taxa	Scor_scro	CB_taxa	CA_CB	1	3	Spain	OUT	4	1	0	0	Spain_OUT_4_1_Scor_scro	0	0
819	Scor_scro_CB_taxa	Scor_scro	CB_taxa	CA_CB	1	3	Spain	OUT	2	1	0	0	Spain_OUT_2_1_Scor_scro	0	0
820	Scor_scro_CB_taxa	Scor_scro	CB_taxa	CA_CB	1	3	Spain	OUT	1	1	0	0	Spain_OUT_1_1_Scor_scro	0	0
821	Scor_scro_CB_taxa	Scor_scro	CB_taxa	CA_CB	1	3	Sardinia	OUT	3	1	0	0	Sardinia_OUT_3_1_Scor_scro	0	0
822	Scor_scro_CB_taxa	Scor_scro	CB_taxa	CA_CB	1	3	Corse2	IN	3	1	0	0	Corse2_IN_3_1_Scor_scro	0	0
823	Scor_scro_CB_taxa	Scor_scro	CB_taxa	CA_CB	1	3	Sardinia	OUT	4	1	0	0	Sardinia_OUT_4_1_Scor_scro	0	0
824	Scor_scro_CB_taxa	Scor_scro	CB_taxa	CA_CB	1	3	Sardinia	IN	2	1	0	0	Sardinia_IN_2_1_Scor_scro	0	0
825	Scor_scro_CB_taxa	Scor_scro	CB_taxa	CA_CB	1	3	Spain	OUT	3	1	0.025	3.34194	Spain_OUT_3_1_Scor_scro	0.025	3.34194
826	Scor_scro_CB_taxa	Scor_scro	CB_taxa	CA_CB	1	3	Sardinia	OUT	2	1	0	0	Sardinia_OUT_2_1_Scor_scro	0	0
827	Scor_scro_CB_taxa	Scor_scro	CB_taxa	CA_CB	1	3	Corse2	OUT	1	1	0	0	Corse2_OUT_1_1_Scor_scro	0	0
828	Scor_scro_CB_taxa	Scor_scro	CB_taxa	CA_CB	1	3	Sardinia	IN	3	1	0	0	Sardinia_IN_3_1_Scor_scro	0	0
829	Scor_scro_CB_taxa	Scor_scro	CB_taxa	CA_CB	1	3	Spain	IN	1	1	0	0	Spain_IN_1_1_Scor_scro	0	0
830	Scor_scro_CB_taxa	Scor_scro	CB_taxa	CA_CB	1	3	Corse2	IN	2	1	0	0	Corse2_IN_2_1_Scor_scro	0	0
831	Scor_scro_CB_taxa	Scor_scro	CB_taxa	CA_CB	1	3	Spain	IN	4	1	0	0	Spain_IN_4_1_Scor_scro	0	0
832	Scor_scro_CB_taxa	Scor_scro	CB_taxa	CA_CB	1	3	Sardinia	OUT	1	1	0	0	Sardinia_OUT_1_1_Scor_scro	0	0
833	Scor_scro_CB_taxa	Scor_scro	CB_taxa	CA_CB	1	3	Corse2	OUT	3	1	0	0	Corse2_OUT_3_1_Scor_scro	0	0
834	Scor_scro_CB_taxa	Scor_scro	CB_taxa	CA_CB	1	3	Spain	IN	3	1	0	0	Spain_IN_3_1_Scor_scro	0	0
835	Scor_scro_CB_taxa	Scor_scro	CB_taxa	CA_CB	1	3	Spain	IN	2	1	0	0	Spain_IN_2_1_Scor_scro	0	0
836	Scor_scro_CB_taxa	Scor_scro	CB_taxa	CA_CB	1	3	Sardinia	IN	1	1	0	0	Sardinia_IN_1_1_Scor_scro	0	0
837	Scor_scro_CB_taxa	Scor_scro	CB_taxa	CA_CB	1	3	Corse2	IN	4	1	0	0	Corse2_IN_4_1_Scor_scro	0	0
838	Scor_scro_CB_taxa	Scor_scro	CB_taxa	CA_CB	1	3	Corse2	OUT	4	1	0	0	Corse2_OUT_4_1_Scor_scro	0	0
839	Scor_scro_CB_taxa	Scor_scro	CB_taxa	CA_CB	1	3	Corse2	OUT	2	1	0	0	Corse2_OUT_2_1_Scor_scro	0	0
840	Scor_scro_CB_taxa	Scor_scro	CB_taxa	CA_CB	1	3	Corse2	IN	1	1	0	0	Corse2_IN_1_1_Scor_scro	0	0
841	Serr_cabr_(sub-)adult_of_NB_taxa	Serr_cabr	(sub-)adult_of_NB_taxa	CA_NB	3	4	Spain	OUT	4	0	0.012	0.403117	Spain_OUT_4_0_Serr_cabr	0.012	0.403117
842	Serr_cabr_(sub-)adult_of_NB_taxa	Serr_cabr	(sub-)adult_of_NB_taxa	CA_NB	3	4	Corse2	OUT	3	0	0.018	0.440256	Corse2_OUT_3_0_Serr_cabr	0.018	0.440256
843	Serr_cabr_(sub-)adult_of_NB_taxa	Serr_cabr	(sub-)adult_of_NB_taxa	CA_NB	3	4	Spain	OUT	1	0	0.004	0.2128	Spain_OUT_1_0_Serr_cabr	0.004	0.2128
844	Serr_cabr_(sub-)adult_of_NB_taxa	Serr_cabr	(sub-)adult_of_NB_taxa	CA_NB	3	4	Corse2	IN	3	0	0.022	0.718972	Corse2_IN_3_0_Serr_cabr	0.022	0.718972
845	Serr_cabr_(sub-)adult_of_NB_taxa	Serr_cabr	(sub-)adult_of_NB_taxa	CA_NB	3	4	Spain	IN	1	0	0.004	0.115386	Spain_IN_1_0_Serr_cabr	0.004	0.115386
846	Serr_cabr_(sub-)adult_of_NB_taxa	Serr_cabr	(sub-)adult_of_NB_taxa	CA_NB	3	4	Corse2	OUT	4	0	0.014	0.538456	Corse2_OUT_4_0_Serr_cabr	0.014	0.538456
847	Serr_cabr_(sub-)adult_of_NB_taxa	Serr_cabr	(sub-)adult_of_NB_taxa	CA_NB	3	4	Spain	OUT	3	0	0.004	0.116645	Spain_OUT_3_0_Serr_cabr	0.004	0.116645
848	Serr_cabr_(sub-)adult_of_NB_taxa	Serr_cabr	(sub-)adult_of_NB_taxa	CA_NB	3	4	Corse2	OUT	1	0	0.004	0.424413	Corse2_OUT_1_0_Serr_cabr	0.004	0.424413
849	Serr_cabr_(sub-)adult_of_NB_taxa	Serr_cabr	(sub-)adult_of_NB_taxa	CA_NB	3	4	Spain	IN	3	0	0.002	0.102263	Spain_IN_3_0_Serr_cabr	0.002	0.102263
850	Serr_cabr_(sub-)adult_of_NB_taxa	Serr_cabr	(sub-)adult_of_NB_taxa	CA_NB	3	4	Sardinia	OUT	4	0	0.006	0.289423	Sardinia_OUT_4_0_Serr_cabr	0.006	0.289423
851	Serr_cabr_(sub-)adult_of_NB_taxa	Serr_cabr	(sub-)adult_of_NB_taxa	CA_NB	3	4	Sardinia	OUT	1	0	0.008	0.194249	Sardinia_OUT_1_0_Serr_cabr	0.008	0.194249
852	Serr_cabr_(sub-)adult_of_NB_taxa	Serr_cabr	(sub-)adult_of_NB_taxa	CA_NB	3	4	Corse2	IN	2	0	0.01	0.602245	Corse2_IN_2_0_Serr_cabr	0.01	0.602245
853	Serr_cabr_(sub-)adult_of_NB_taxa	Serr_cabr	(sub-)adult_of_NB_taxa	CA_NB	3	4	Sardinia	OUT	3	0	0.01	0.314774	Sardinia_OUT_3_0_Serr_cabr	0.01	0.314774
854	Serr_cabr_(sub-)adult_of_NB_taxa	Serr_cabr	(sub-)adult_of_NB_taxa	CA_NB	3	4	Corse2	IN	1	0	0.1	5.74415	Corse2_IN_1_0_Serr_cabr	0.1	5.74415
855	Serr_cabr_(sub-)adult_of_NB_taxa	Serr_cabr	(sub-)adult_of_NB_taxa	CA_NB	3	4	Sardinia	IN	1	0	0.006	0.290287	Sardinia_IN_1_0_Serr_cabr	0.006	0.290287
856	Serr_cabr_(sub-)adult_of_NB_taxa	Serr_cabr	(sub-)adult_of_NB_taxa	CA_NB	3	4	Sardinia	IN	2	0	0.006	0.259364	Sardinia_IN_2_0_Serr_cabr	0.006	0.259364
857	Serr_cabr_(sub-)adult_of_NB_taxa	Serr_cabr	(sub-)adult_of_NB_taxa	CA_NB	3	4	Spain	IN	4	0	0.008	0.391686	Spain_IN_4_0_Serr_cabr	0.008	0.391686
858	Serr_cabr_(sub-)adult_of_NB_taxa	Serr_cabr	(sub-)adult_of_NB_taxa	CA_NB	3	4	Corse2	OUT	2	0	0.004	0.1571	Corse2_OUT_2_0_Serr_cabr	0.004	0.1571
859	Serr_cabr_(sub-)adult_of_NB_taxa	Serr_cabr	(sub-)adult_of_NB_taxa	CA_NB	3	4	Sardinia	IN	4	0	0.008	0.409947	Sardinia_IN_4_0_Serr_cabr	0.008	0.409947
860	Serr_cabr_(sub-)adult_of_NB_taxa	Serr_cabr	(sub-)adult_of_NB_taxa	CA_NB	3	4	Spain	IN	2	0	0.004	0.072348	Spain_IN_2_0_Serr_cabr	0.004	0.072348
861	Serr_cabr_(sub-)adult_of_NB_taxa	Serr_cabr	(sub-)adult_of_NB_taxa	CA_NB	3	4	Sardinia	OUT	2	0	0	0	Sardinia_OUT_2_0_Serr_cabr	0	0
862	Serr_cabr_(sub-)adult_of_NB_taxa	Serr_cabr	(sub-)adult_of_NB_taxa	CA_NB	3	4	Sardinia	IN	3	0	0.01	0.791378	Sardinia_IN_3_0_Serr_cabr	0.01	0.791378
863	Serr_cabr_(sub-)adult_of_NB_taxa	Serr_cabr	(sub-)adult_of_NB_taxa	CA_NB	3	4	Spain	OUT	2	0	0.008	0.188993	Spain_OUT_2_0_Serr_cabr	0.008	0.188993
864	Serr_cabr_(sub-)adult_of_NB_taxa	Serr_cabr	(sub-)adult_of_NB_taxa	CA_NB	3	4	Corse2	IN	4	0	0.018	0.853423	Corse2_IN_4_0_Serr_cabr	0.018	0.853423
865	Serr_cabr_CB_juvenile_of_NB_taxa	Serr_cabr	CB_juvenile_of_NB_taxa	CA_CB	2	3	Sardinia	IN	4	1	0	0	Sardinia_IN_4_1_Serr_cabr	0	0
866	Serr_cabr_CB_juvenile_of_NB_taxa	Serr_cabr	CB_juvenile_of_NB_taxa	CA_CB	2	3	Corse2	IN	4	1	0.05	0.0728209	Corse2_IN_4_1_Serr_cabr	0.05	0.0728209
867	Serr_cabr_CB_juvenile_of_NB_taxa	Serr_cabr	CB_juvenile_of_NB_taxa	CA_CB	2	3	Sardinia	OUT	4	1	0	0	Sardinia_OUT_4_1_Serr_cabr	0	0
868	Serr_cabr_CB_juvenile_of_NB_taxa	Serr_cabr	CB_juvenile_of_NB_taxa	CA_CB	2	3	Sardinia	OUT	2	1	0	0	Sardinia_OUT_2_1_Serr_cabr	0	0
869	Serr_cabr_CB_juvenile_of_NB_taxa	Serr_cabr	CB_juvenile_of_NB_taxa	CA_CB	2	3	Sardinia	IN	3	1	0	0	Sardinia_IN_3_1_Serr_cabr	0	0
870	Serr_cabr_CB_juvenile_of_NB_taxa	Serr_cabr	CB_juvenile_of_NB_taxa	CA_CB	2	3	Sardinia	IN	2	1	0.025	0.0475396	Sardinia_IN_2_1_Serr_cabr	0.025	0.0475396
871	Serr_cabr_CB_juvenile_of_NB_taxa	Serr_cabr	CB_juvenile_of_NB_taxa	CA_CB	2	3	Corse2	IN	3	1	0.075	0.0476816	Corse2_IN_3_1_Serr_cabr	0.075	0.0476816
872	Serr_cabr_CB_juvenile_of_NB_taxa	Serr_cabr	CB_juvenile_of_NB_taxa	CA_CB	2	3	Spain	OUT	1	1	0	0	Spain_OUT_1_1_Serr_cabr	0	0
873	Serr_cabr_CB_juvenile_of_NB_taxa	Serr_cabr	CB_juvenile_of_NB_taxa	CA_CB	2	3	Spain	OUT	4	1	0.025	0.0252813	Spain_OUT_4_1_Serr_cabr	0.025	0.0252813
874	Serr_cabr_CB_juvenile_of_NB_taxa	Serr_cabr	CB_juvenile_of_NB_taxa	CA_CB	2	3	Spain	OUT	2	1	0	0	Spain_OUT_2_1_Serr_cabr	0	0
875	Serr_cabr_CB_juvenile_of_NB_taxa	Serr_cabr	CB_juvenile_of_NB_taxa	CA_CB	2	3	Spain	OUT	3	1	0	0	Spain_OUT_3_1_Serr_cabr	0	0
876	Serr_cabr_CB_juvenile_of_NB_taxa	Serr_cabr	CB_juvenile_of_NB_taxa	CA_CB	2	3	Sardinia	OUT	3	1	0	0	Sardinia_OUT_3_1_Serr_cabr	0	0
877	Serr_cabr_CB_juvenile_of_NB_taxa	Serr_cabr	CB_juvenile_of_NB_taxa	CA_CB	2	3	Corse2	OUT	4	1	0.15	0.218463	Corse2_OUT_4_1_Serr_cabr	0.15	0.218463
878	Serr_cabr_CB_juvenile_of_NB_taxa	Serr_cabr	CB_juvenile_of_NB_taxa	CA_CB	2	3	Corse2	OUT	3	1	0.05	0.0728209	Corse2_OUT_3_1_Serr_cabr	0.05	0.0728209
879	Serr_cabr_CB_juvenile_of_NB_taxa	Serr_cabr	CB_juvenile_of_NB_taxa	CA_CB	2	3	Spain	IN	3	1	0.025	0.0112001	Spain_IN_3_1_Serr_cabr	0.025	0.0112001
880	Serr_cabr_CB_juvenile_of_NB_taxa	Serr_cabr	CB_juvenile_of_NB_taxa	CA_CB	2	3	Corse2	IN	2	1	0.05	0.0728209	Corse2_IN_2_1_Serr_cabr	0.05	0.0728209
881	Serr_cabr_CB_juvenile_of_NB_taxa	Serr_cabr	CB_juvenile_of_NB_taxa	CA_CB	2	3	Corse2	OUT	2	1	0	0	Corse2_OUT_2_1_Serr_cabr	0	0
882	Serr_cabr_CB_juvenile_of_NB_taxa	Serr_cabr	CB_juvenile_of_NB_taxa	CA_CB	2	3	Sardinia	IN	1	1	0	0	Sardinia_IN_1_1_Serr_cabr	0	0
883	Serr_cabr_CB_juvenile_of_NB_taxa	Serr_cabr	CB_juvenile_of_NB_taxa	CA_CB	2	3	Sardinia	OUT	1	1	0	0	Sardinia_OUT_1_1_Serr_cabr	0	0
884	Serr_cabr_CB_juvenile_of_NB_taxa	Serr_cabr	CB_juvenile_of_NB_taxa	CA_CB	2	3	Spain	IN	4	1	0	0	Spain_IN_4_1_Serr_cabr	0	0
885	Serr_cabr_CB_juvenile_of_NB_taxa	Serr_cabr	CB_juvenile_of_NB_taxa	CA_CB	2	3	Spain	IN	2	1	0	0	Spain_IN_2_1_Serr_cabr	0	0
886	Serr_cabr_CB_juvenile_of_NB_taxa	Serr_cabr	CB_juvenile_of_NB_taxa	CA_CB	2	3	Corse2	OUT	1	1	0	0	Corse2_OUT_1_1_Serr_cabr	0	0
887	Serr_cabr_CB_juvenile_of_NB_taxa	Serr_cabr	CB_juvenile_of_NB_taxa	CA_CB	2	3	Spain	IN	1	1	0.025	0.0112001	Spain_IN_1_1_Serr_cabr	0.025	0.0112001
888	Serr_cabr_CB_juvenile_of_NB_taxa	Serr_cabr	CB_juvenile_of_NB_taxa	CA_CB	2	3	Corse2	IN	1	1	0.025	0.0475396	Corse2_IN_1_1_Serr_cabr	0.025	0.0475396
889	Serr_scri_(sub-)adult_of_NB_taxa	Serr_scri	(sub-)adult_of_NB_taxa	CA_NB	3	4	Sardinia	OUT	3	0	0.014	0.24838	Sardinia_OUT_3_0_Serr_scri	0.014	0.24838
890	Serr_scri_(sub-)adult_of_NB_taxa	Serr_scri	(sub-)adult_of_NB_taxa	CA_NB	3	4	Sardinia	OUT	1	0	0.008	0.16556	Sardinia_OUT_1_0_Serr_scri	0.008	0.16556
891	Serr_scri_(sub-)adult_of_NB_taxa	Serr_scri	(sub-)adult_of_NB_taxa	CA_NB	3	4	Sardinia	OUT	2	0	0.0186667	0.431629	Sardinia_OUT_2_0_Serr_scri	0.0186667	0.431629
892	Serr_scri_(sub-)adult_of_NB_taxa	Serr_scri	(sub-)adult_of_NB_taxa	CA_NB	3	4	Sardinia	OUT	4	0	0.014	0.280417	Sardinia_OUT_4_0_Serr_scri	0.014	0.280417
893	Serr_scri_(sub-)adult_of_NB_taxa	Serr_scri	(sub-)adult_of_NB_taxa	CA_NB	3	4	Spain	IN	4	0	0.016	0.871067	Spain_IN_4_0_Serr_scri	0.016	0.871067
894	Serr_scri_(sub-)adult_of_NB_taxa	Serr_scri	(sub-)adult_of_NB_taxa	CA_NB	3	4	Spain	OUT	1	0	0.018	0.841064	Spain_OUT_1_0_Serr_scri	0.018	0.841064
895	Serr_scri_(sub-)adult_of_NB_taxa	Serr_scri	(sub-)adult_of_NB_taxa	CA_NB	3	4	Spain	OUT	4	0	0.028	0.916525	Spain_OUT_4_0_Serr_scri	0.028	0.916525
896	Serr_scri_(sub-)adult_of_NB_taxa	Serr_scri	(sub-)adult_of_NB_taxa	CA_NB	3	4	Sardinia	IN	4	0	0.02	0.909332	Sardinia_IN_4_0_Serr_scri	0.02	0.909332
897	Serr_scri_(sub-)adult_of_NB_taxa	Serr_scri	(sub-)adult_of_NB_taxa	CA_NB	3	4	Spain	OUT	2	0	0.016	0.606774	Spain_OUT_2_0_Serr_scri	0.016	0.606774
898	Serr_scri_(sub-)adult_of_NB_taxa	Serr_scri	(sub-)adult_of_NB_taxa	CA_NB	3	4	Spain	IN	1	0	0.035	1.72327	Spain_IN_1_0_Serr_scri	0.035	1.72327
899	Serr_scri_(sub-)adult_of_NB_taxa	Serr_scri	(sub-)adult_of_NB_taxa	CA_NB	3	4	Spain	OUT	3	0	0.014	0.485205	Spain_OUT_3_0_Serr_scri	0.014	0.485205
900	Serr_scri_(sub-)adult_of_NB_taxa	Serr_scri	(sub-)adult_of_NB_taxa	CA_NB	3	4	Corse2	OUT	4	0	0.004	0.126084	Corse2_OUT_4_0_Serr_scri	0.004	0.126084
901	Serr_scri_(sub-)adult_of_NB_taxa	Serr_scri	(sub-)adult_of_NB_taxa	CA_NB	3	4	Corse2	IN	1	0	0.036	1.58764	Corse2_IN_1_0_Serr_scri	0.036	1.58764
902	Serr_scri_(sub-)adult_of_NB_taxa	Serr_scri	(sub-)adult_of_NB_taxa	CA_NB	3	4	Corse2	IN	4	0	0.02	0.701288	Corse2_IN_4_0_Serr_scri	0.02	0.701288
903	Serr_scri_(sub-)adult_of_NB_taxa	Serr_scri	(sub-)adult_of_NB_taxa	CA_NB	3	4	Corse2	OUT	3	0	0.022	0.81509	Corse2_OUT_3_0_Serr_scri	0.022	0.81509
904	Serr_scri_(sub-)adult_of_NB_taxa	Serr_scri	(sub-)adult_of_NB_taxa	CA_NB	3	4	Corse2	IN	3	0	0.004	0.107459	Corse2_IN_3_0_Serr_scri	0.004	0.107459
905	Serr_scri_(sub-)adult_of_NB_taxa	Serr_scri	(sub-)adult_of_NB_taxa	CA_NB	3	4	Corse2	OUT	2	0	0.018	0.810839	Corse2_OUT_2_0_Serr_scri	0.018	0.810839
906	Serr_scri_(sub-)adult_of_NB_taxa	Serr_scri	(sub-)adult_of_NB_taxa	CA_NB	3	4	Sardinia	IN	1	0	0.014	0.714757	Sardinia_IN_1_0_Serr_scri	0.014	0.714757
907	Serr_scri_(sub-)adult_of_NB_taxa	Serr_scri	(sub-)adult_of_NB_taxa	CA_NB	3	4	Corse2	IN	2	0	0	0	Corse2_IN_2_0_Serr_scri	0	0
908	Serr_scri_(sub-)adult_of_NB_taxa	Serr_scri	(sub-)adult_of_NB_taxa	CA_NB	3	4	Spain	IN	2	0	0.056	2.75535	Spain_IN_2_0_Serr_scri	0.056	2.75535
909	Serr_scri_(sub-)adult_of_NB_taxa	Serr_scri	(sub-)adult_of_NB_taxa	CA_NB	3	4	Corse2	OUT	1	0	0.028	1.36101	Corse2_OUT_1_0_Serr_scri	0.028	1.36101
910	Serr_scri_(sub-)adult_of_NB_taxa	Serr_scri	(sub-)adult_of_NB_taxa	CA_NB	3	4	Sardinia	IN	3	0	0.012	0.806096	Sardinia_IN_3_0_Serr_scri	0.012	0.806096
911	Serr_scri_(sub-)adult_of_NB_taxa	Serr_scri	(sub-)adult_of_NB_taxa	CA_NB	3	4	Spain	IN	3	0	0.01	0.227529	Spain_IN_3_0_Serr_scri	0.01	0.227529
912	Serr_scri_(sub-)adult_of_NB_taxa	Serr_scri	(sub-)adult_of_NB_taxa	CA_NB	3	4	Sardinia	IN	2	0	0.034	1.39722	Sardinia_IN_2_0_Serr_scri	0.034	1.39722
913	Serr_scri_CB_juvenile_of_NB_taxa	Serr_scri	CB_juvenile_of_NB_taxa	CA_CB	2	3	Spain	OUT	1	1	0	0	Spain_OUT_1_1_Serr_scri	0	0
914	Serr_scri_CB_juvenile_of_NB_taxa	Serr_scri	CB_juvenile_of_NB_taxa	CA_CB	2	3	Corse2	OUT	3	1	0	0	Corse2_OUT_3_1_Serr_scri	0	0
915	Serr_scri_CB_juvenile_of_NB_taxa	Serr_scri	CB_juvenile_of_NB_taxa	CA_CB	2	3	Sardinia	OUT	4	1	0.025	0.029777	Sardinia_OUT_4_1_Serr_scri	0.025	0.029777
916	Serr_scri_CB_juvenile_of_NB_taxa	Serr_scri	CB_juvenile_of_NB_taxa	CA_CB	2	3	Sardinia	IN	1	1	0	0	Sardinia_IN_1_1_Serr_scri	0	0
917	Serr_scri_CB_juvenile_of_NB_taxa	Serr_scri	CB_juvenile_of_NB_taxa	CA_CB	2	3	Corse2	IN	3	1	0	0	Corse2_IN_3_1_Serr_scri	0	0
918	Serr_scri_CB_juvenile_of_NB_taxa	Serr_scri	CB_juvenile_of_NB_taxa	CA_CB	2	3	Spain	IN	4	1	0	0	Spain_IN_4_1_Serr_scri	0	0
919	Serr_scri_CB_juvenile_of_NB_taxa	Serr_scri	CB_juvenile_of_NB_taxa	CA_CB	2	3	Sardinia	OUT	1	1	0	0	Sardinia_OUT_1_1_Serr_scri	0	0
920	Serr_scri_CB_juvenile_of_NB_taxa	Serr_scri	CB_juvenile_of_NB_taxa	CA_CB	2	3	Sardinia	IN	4	1	0	0	Sardinia_IN_4_1_Serr_scri	0	0
921	Serr_scri_CB_juvenile_of_NB_taxa	Serr_scri	CB_juvenile_of_NB_taxa	CA_CB	2	3	Spain	OUT	2	1	0	0	Spain_OUT_2_1_Serr_scri	0	0
922	Serr_scri_CB_juvenile_of_NB_taxa	Serr_scri	CB_juvenile_of_NB_taxa	CA_CB	2	3	Spain	IN	3	1	0	0	Spain_IN_3_1_Serr_scri	0	0
923	Serr_scri_CB_juvenile_of_NB_taxa	Serr_scri	CB_juvenile_of_NB_taxa	CA_CB	2	3	Corse2	OUT	2	1	0	0	Corse2_OUT_2_1_Serr_scri	0	0
924	Serr_scri_CB_juvenile_of_NB_taxa	Serr_scri	CB_juvenile_of_NB_taxa	CA_CB	2	3	Spain	OUT	4	1	0	0	Spain_OUT_4_1_Serr_scri	0	0
925	Serr_scri_CB_juvenile_of_NB_taxa	Serr_scri	CB_juvenile_of_NB_taxa	CA_CB	2	3	Sardinia	IN	3	1	0	0	Sardinia_IN_3_1_Serr_scri	0	0
926	Serr_scri_CB_juvenile_of_NB_taxa	Serr_scri	CB_juvenile_of_NB_taxa	CA_CB	2	3	Spain	OUT	3	1	0	0	Spain_OUT_3_1_Serr_scri	0	0
927	Serr_scri_CB_juvenile_of_NB_taxa	Serr_scri	CB_juvenile_of_NB_taxa	CA_CB	2	3	Sardinia	OUT	2	1	0	0	Sardinia_OUT_2_1_Serr_scri	0	0
928	Serr_scri_CB_juvenile_of_NB_taxa	Serr_scri	CB_juvenile_of_NB_taxa	CA_CB	2	3	Corse2	OUT	1	1	0	0	Corse2_OUT_1_1_Serr_scri	0	0
929	Serr_scri_CB_juvenile_of_NB_taxa	Serr_scri	CB_juvenile_of_NB_taxa	CA_CB	2	3	Sardinia	IN	2	1	0.025	0.0153482	Sardinia_IN_2_1_Serr_scri	0.025	0.0153482
930	Serr_scri_CB_juvenile_of_NB_taxa	Serr_scri	CB_juvenile_of_NB_taxa	CA_CB	2	3	Corse2	IN	4	1	0	0	Corse2_IN_4_1_Serr_scri	0	0
931	Serr_scri_CB_juvenile_of_NB_taxa	Serr_scri	CB_juvenile_of_NB_taxa	CA_CB	2	3	Corse2	IN	1	1	0	0	Corse2_IN_1_1_Serr_scri	0	0
932	Serr_scri_CB_juvenile_of_NB_taxa	Serr_scri	CB_juvenile_of_NB_taxa	CA_CB	2	3	Spain	IN	1	1	0	0	Spain_IN_1_1_Serr_scri	0	0
933	Serr_scri_CB_juvenile_of_NB_taxa	Serr_scri	CB_juvenile_of_NB_taxa	CA_CB	2	3	Corse2	IN	2	1	0	0	Corse2_IN_2_1_Serr_scri	0	0
934	Serr_scri_CB_juvenile_of_NB_taxa	Serr_scri	CB_juvenile_of_NB_taxa	CA_CB	2	3	Sardinia	OUT	3	1	0	0	Sardinia_OUT_3_1_Serr_scri	0	0
935	Serr_scri_CB_juvenile_of_NB_taxa	Serr_scri	CB_juvenile_of_NB_taxa	CA_CB	2	3	Spain	IN	2	1	0	0	Spain_IN_2_1_Serr_scri	0	0
936	Serr_scri_CB_juvenile_of_NB_taxa	Serr_scri	CB_juvenile_of_NB_taxa	CA_CB	2	3	Corse2	OUT	4	1	0	0	Corse2_OUT_4_1_Serr_scri	0	0
937	Spar_aura_(sub-)adult_of_NB_taxa	Spar_aura	(sub-)adult_of_NB_taxa	CA_NB	3	4	Corse2	IN	4	0	0	0	Corse2_IN_4_0_Spar_aura	0.000357143	0.228571
938	Spar_aura_(sub-)adult_of_NB_taxa	Spar_aura	(sub-)adult_of_NB_taxa	CA_NB	3	4	Spain	IN	2	0	0	0	Spain_IN_2_0_Spar_aura	0.000357143	0.228571
939	Spar_aura_(sub-)adult_of_NB_taxa	Spar_aura	(sub-)adult_of_NB_taxa	CA_NB	3	4	Spain	OUT	3	0	0	0	Spain_OUT_3_0_Spar_aura	0	0
940	Spar_aura_(sub-)adult_of_NB_taxa	Spar_aura	(sub-)adult_of_NB_taxa	CA_NB	3	4	Sardinia	OUT	4	0	0	0	Sardinia_OUT_4_0_Spar_aura	0	0
941	Spar_aura_(sub-)adult_of_NB_taxa	Spar_aura	(sub-)adult_of_NB_taxa	CA_NB	3	4	Sardinia	OUT	1	0	0	0	Sardinia_OUT_1_0_Spar_aura	0	0
942	Spar_aura_(sub-)adult_of_NB_taxa	Spar_aura	(sub-)adult_of_NB_taxa	CA_NB	3	4	Spain	OUT	4	0	0	0	Spain_OUT_4_0_Spar_aura	0	0
943	Spar_aura_(sub-)adult_of_NB_taxa	Spar_aura	(sub-)adult_of_NB_taxa	CA_NB	3	4	Corse2	OUT	3	0	0	0	Corse2_OUT_3_0_Spar_aura	0	0
944	Spar_aura_(sub-)adult_of_NB_taxa	Spar_aura	(sub-)adult_of_NB_taxa	CA_NB	3	4	Spain	OUT	1	0	0	0	Spain_OUT_1_0_Spar_aura	0	0
945	Spar_aura_(sub-)adult_of_NB_taxa	Spar_aura	(sub-)adult_of_NB_taxa	CA_NB	3	4	Sardinia	IN	4	0	0	0	Sardinia_IN_4_0_Spar_aura	0	0
946	Spar_aura_(sub-)adult_of_NB_taxa	Spar_aura	(sub-)adult_of_NB_taxa	CA_NB	3	4	Spain	IN	4	0	0.002	2.5	Spain_IN_4_0_Spar_aura	0.000714286	1.21786
947	Spar_aura_(sub-)adult_of_NB_taxa	Spar_aura	(sub-)adult_of_NB_taxa	CA_NB	3	4	Corse2	OUT	2	0	0	0	Corse2_OUT_2_0_Spar_aura	0	0
948	Spar_aura_(sub-)adult_of_NB_taxa	Spar_aura	(sub-)adult_of_NB_taxa	CA_NB	3	4	Sardinia	OUT	2	0	0	0	Sardinia_OUT_2_0_Spar_aura	0	0
949	Spar_aura_(sub-)adult_of_NB_taxa	Spar_aura	(sub-)adult_of_NB_taxa	CA_NB	3	4	Corse2	OUT	1	0	0	0	Corse2_OUT_1_0_Spar_aura	0	0
950	Spar_aura_(sub-)adult_of_NB_taxa	Spar_aura	(sub-)adult_of_NB_taxa	CA_NB	3	4	Corse2	IN	3	0	0	0	Corse2_IN_3_0_Spar_aura	0	0
951	Spar_aura_(sub-)adult_of_NB_taxa	Spar_aura	(sub-)adult_of_NB_taxa	CA_NB	3	4	Spain	IN	1	0	0	0	Spain_IN_1_0_Spar_aura	0	0
952	Spar_aura_(sub-)adult_of_NB_taxa	Spar_aura	(sub-)adult_of_NB_taxa	CA_NB	3	4	Spain	OUT	2	0	0	0	Spain_OUT_2_0_Spar_aura	0	0
953	Spar_aura_(sub-)adult_of_NB_taxa	Spar_aura	(sub-)adult_of_NB_taxa	CA_NB	3	4	Corse2	IN	1	0	0	0	Corse2_IN_1_0_Spar_aura	0	0
954	Spar_aura_(sub-)adult_of_NB_taxa	Spar_aura	(sub-)adult_of_NB_taxa	CA_NB	3	4	Sardinia	IN	2	0	0	0	Sardinia_IN_2_0_Spar_aura	0	0
955	Spar_aura_(sub-)adult_of_NB_taxa	Spar_aura	(sub-)adult_of_NB_taxa	CA_NB	3	4	Sardinia	OUT	3	0	0	0	Sardinia_OUT_3_0_Spar_aura	0	0
956	Spar_aura_(sub-)adult_of_NB_taxa	Spar_aura	(sub-)adult_of_NB_taxa	CA_NB	3	4	Corse2	OUT	4	0	0	0	Corse2_OUT_4_0_Spar_aura	0	0
957	Spar_aura_(sub-)adult_of_NB_taxa	Spar_aura	(sub-)adult_of_NB_taxa	CA_NB	3	4	Sardinia	IN	1	0	0	0	Sardinia_IN_1_0_Spar_aura	0	0
958	Spar_aura_(sub-)adult_of_NB_taxa	Spar_aura	(sub-)adult_of_NB_taxa	CA_NB	3	4	Sardinia	IN	3	0	0.002	0.21296	Sardinia_IN_3_0_Spar_aura	0.002	0.21296
959	Spar_aura_(sub-)adult_of_NB_taxa	Spar_aura	(sub-)adult_of_NB_taxa	CA_NB	3	4	Corse2	IN	2	0	0	0	Corse2_IN_2_0_Spar_aura	0	0
960	Spar_aura_(sub-)adult_of_NB_taxa	Spar_aura	(sub-)adult_of_NB_taxa	CA_NB	3	4	Spain	IN	3	0	0	0	Spain_IN_3_0_Spar_aura	0.000357143	0.446429
961	Sphy_viri_(sub-)adult_of_NB_taxa	Sphy_viri	(sub-)adult_of_NB_taxa	TOP	3	5	Spain	OUT	4	0	0	0	Spain_OUT_4_0_Sphy_viri	0	0
962	Sphy_viri_(sub-)adult_of_NB_taxa	Sphy_viri	(sub-)adult_of_NB_taxa	TOP	3	5	Spain	IN	4	0	0	0	Spain_IN_4_0_Sphy_viri	0	0
963	Sphy_viri_(sub-)adult_of_NB_taxa	Sphy_viri	(sub-)adult_of_NB_taxa	TOP	3	5	Sardinia	IN	4	0	0	0	Sardinia_IN_4_0_Sphy_viri	0	0
964	Sphy_viri_(sub-)adult_of_NB_taxa	Sphy_viri	(sub-)adult_of_NB_taxa	TOP	3	5	Spain	OUT	3	0	0	0	Spain_OUT_3_0_Sphy_viri	0	0
965	Sphy_viri_(sub-)adult_of_NB_taxa	Sphy_viri	(sub-)adult_of_NB_taxa	TOP	3	5	Sardinia	OUT	4	0	0	0	Sardinia_OUT_4_0_Sphy_viri	0	0
966	Sphy_viri_(sub-)adult_of_NB_taxa	Sphy_viri	(sub-)adult_of_NB_taxa	TOP	3	5	Spain	IN	1	0	0	0	Spain_IN_1_0_Sphy_viri	0.0341071	25.0935
967	Sphy_viri_(sub-)adult_of_NB_taxa	Sphy_viri	(sub-)adult_of_NB_taxa	TOP	3	5	Spain	OUT	2	0	0	0	Spain_OUT_2_0_Sphy_viri	0	0
968	Sphy_viri_(sub-)adult_of_NB_taxa	Sphy_viri	(sub-)adult_of_NB_taxa	TOP	3	5	Sardinia	OUT	2	0	0	0	Sardinia_OUT_2_0_Sphy_viri	0	0
969	Sphy_viri_(sub-)adult_of_NB_taxa	Sphy_viri	(sub-)adult_of_NB_taxa	TOP	3	5	Spain	OUT	1	0	0	0	Spain_OUT_1_0_Sphy_viri	0	0
970	Sphy_viri_(sub-)adult_of_NB_taxa	Sphy_viri	(sub-)adult_of_NB_taxa	TOP	3	5	Corse2	IN	1	0	0	0	Corse2_IN_1_0_Sphy_viri	0	0
971	Sphy_viri_(sub-)adult_of_NB_taxa	Sphy_viri	(sub-)adult_of_NB_taxa	TOP	3	5	Sardinia	IN	1	0	0	0	Sardinia_IN_1_0_Sphy_viri	0	0
972	Sphy_viri_(sub-)adult_of_NB_taxa	Sphy_viri	(sub-)adult_of_NB_taxa	TOP	3	5	Spain	IN	2	0	0	0	Spain_IN_2_0_Sphy_viri	0.00392857	3.01752
973	Sphy_viri_(sub-)adult_of_NB_taxa	Sphy_viri	(sub-)adult_of_NB_taxa	TOP	3	5	Corse2	OUT	4	0	0	0	Corse2_OUT_4_0_Sphy_viri	0	0
974	Sphy_viri_(sub-)adult_of_NB_taxa	Sphy_viri	(sub-)adult_of_NB_taxa	TOP	3	5	Sardinia	OUT	3	0	0	0	Sardinia_OUT_3_0_Sphy_viri	0	0
975	Sphy_viri_(sub-)adult_of_NB_taxa	Sphy_viri	(sub-)adult_of_NB_taxa	TOP	3	5	Corse2	OUT	1	0	0	0	Corse2_OUT_1_0_Sphy_viri	0	0
976	Sphy_viri_(sub-)adult_of_NB_taxa	Sphy_viri	(sub-)adult_of_NB_taxa	TOP	3	5	Sardinia	IN	3	0	0	0	Sardinia_IN_3_0_Sphy_viri	0.0178571	7.14898
977	Sphy_viri_(sub-)adult_of_NB_taxa	Sphy_viri	(sub-)adult_of_NB_taxa	TOP	3	5	Spain	IN	3	0	0	0	Spain_IN_3_0_Sphy_viri	0.0267857	27.4705
978	Sphy_viri_(sub-)adult_of_NB_taxa	Sphy_viri	(sub-)adult_of_NB_taxa	TOP	3	5	Corse2	IN	2	0	0	0	Corse2_IN_2_0_Sphy_viri	0	0
979	Sphy_viri_(sub-)adult_of_NB_taxa	Sphy_viri	(sub-)adult_of_NB_taxa	TOP	3	5	Corse2	IN	4	0	0	0	Corse2_IN_4_0_Sphy_viri	0	0
980	Sphy_viri_(sub-)adult_of_NB_taxa	Sphy_viri	(sub-)adult_of_NB_taxa	TOP	3	5	Corse2	OUT	3	0	0	0	Corse2_OUT_3_0_Sphy_viri	0	0
981	Sphy_viri_(sub-)adult_of_NB_taxa	Sphy_viri	(sub-)adult_of_NB_taxa	TOP	3	5	Sardinia	OUT	1	0	0	0	Sardinia_OUT_1_0_Sphy_viri	0	0
982	Sphy_viri_(sub-)adult_of_NB_taxa	Sphy_viri	(sub-)adult_of_NB_taxa	TOP	3	5	Sardinia	IN	2	0	0	0	Sardinia_IN_2_0_Sphy_viri	0	0
983	Sphy_viri_(sub-)adult_of_NB_taxa	Sphy_viri	(sub-)adult_of_NB_taxa	TOP	3	5	Corse2	IN	3	0	0	0	Corse2_IN_3_0_Sphy_viri	0	0
984	Sphy_viri_(sub-)adult_of_NB_taxa	Sphy_viri	(sub-)adult_of_NB_taxa	TOP	3	5	Corse2	OUT	2	0	0	0	Corse2_OUT_2_0_Sphy_viri	0	0
985	Spic_inde_(sub-)adult_of_NB_taxa	Spic_inde	(sub-)adult_of_NB_taxa	PLA_SC	3	2	Spain	IN	1	0	0	0	Spain_IN_1_0_Spic_inde	0	0
986	Spic_inde_(sub-)adult_of_NB_taxa	Spic_inde	(sub-)adult_of_NB_taxa	PLA_SC	3	2	Sardinia	IN	4	0	0.02	0.77501	Sardinia_IN_4_0_Spic_inde	0.02	0.77501
987	Spic_inde_(sub-)adult_of_NB_taxa	Spic_inde	(sub-)adult_of_NB_taxa	PLA_SC	3	2	Corse2	OUT	2	0	0	0	Corse2_OUT_2_0_Spic_inde	0	0
988	Spic_inde_(sub-)adult_of_NB_taxa	Spic_inde	(sub-)adult_of_NB_taxa	PLA_SC	3	2	Spain	OUT	2	0	0	0	Spain_OUT_2_0_Spic_inde	0	0
989	Spic_inde_(sub-)adult_of_NB_taxa	Spic_inde	(sub-)adult_of_NB_taxa	PLA_SC	3	2	Sardinia	OUT	2	0	0	0	Sardinia_OUT_2_0_Spic_inde	0	0
990	Spic_inde_(sub-)adult_of_NB_taxa	Spic_inde	(sub-)adult_of_NB_taxa	PLA_SC	3	2	Corse2	IN	3	0	0	0	Corse2_IN_3_0_Spic_inde	0	0
991	Spic_inde_(sub-)adult_of_NB_taxa	Spic_inde	(sub-)adult_of_NB_taxa	PLA_SC	3	2	Spain	IN	4	0	0	0	Spain_IN_4_0_Spic_inde	0	0
992	Spic_inde_(sub-)adult_of_NB_taxa	Spic_inde	(sub-)adult_of_NB_taxa	PLA_SC	3	2	Spain	OUT	1	0	0	0	Spain_OUT_1_0_Spic_inde	0	0
993	Spic_inde_(sub-)adult_of_NB_taxa	Spic_inde	(sub-)adult_of_NB_taxa	PLA_SC	3	2	Sardinia	IN	2	0	0	0	Sardinia_IN_2_0_Spic_inde	0	0
994	Spic_inde_(sub-)adult_of_NB_taxa	Spic_inde	(sub-)adult_of_NB_taxa	PLA_SC	3	2	Corse2	OUT	1	0	0	0	Corse2_OUT_1_0_Spic_inde	0	0
995	Spic_inde_(sub-)adult_of_NB_taxa	Spic_inde	(sub-)adult_of_NB_taxa	PLA_SC	3	2	Spain	OUT	4	0	0	0	Spain_OUT_4_0_Spic_inde	0	0
996	Spic_inde_(sub-)adult_of_NB_taxa	Spic_inde	(sub-)adult_of_NB_taxa	PLA_SC	3	2	Sardinia	IN	1	0	0	0	Sardinia_IN_1_0_Spic_inde	0	0
997	Spic_inde_(sub-)adult_of_NB_taxa	Spic_inde	(sub-)adult_of_NB_taxa	PLA_SC	3	2	Sardinia	IN	3	0	0	0	Sardinia_IN_3_0_Spic_inde	0	0
998	Spic_inde_(sub-)adult_of_NB_taxa	Spic_inde	(sub-)adult_of_NB_taxa	PLA_SC	3	2	Corse2	IN	4	0	0.04	3.0139	Corse2_IN_4_0_Spic_inde	0.04	3.0139
999	Spic_inde_(sub-)adult_of_NB_taxa	Spic_inde	(sub-)adult_of_NB_taxa	PLA_SC	3	2	Spain	OUT	3	0	0	0	Spain_OUT_3_0_Spic_inde	0	0
1000	Spic_inde_(sub-)adult_of_NB_taxa	Spic_inde	(sub-)adult_of_NB_taxa	PLA_SC	3	2	Sardinia	OUT	3	0	0	0	Sardinia_OUT_3_0_Spic_inde	0	0
1001	Spic_inde_(sub-)adult_of_NB_taxa	Spic_inde	(sub-)adult_of_NB_taxa	PLA_SC	3	2	Sardinia	OUT	4	0	0	0	Sardinia_OUT_4_0_Spic_inde	0	0
1002	Spic_inde_(sub-)adult_of_NB_taxa	Spic_inde	(sub-)adult_of_NB_taxa	PLA_SC	3	2	Corse2	OUT	4	0	0.16	11.4666	Corse2_OUT_4_0_Spic_inde	0.16	11.4666
1003	Spic_inde_(sub-)adult_of_NB_taxa	Spic_inde	(sub-)adult_of_NB_taxa	PLA_SC	3	2	Spain	IN	3	0	0	0	Spain_IN_3_0_Spic_inde	0	0
1004	Spic_inde_(sub-)adult_of_NB_taxa	Spic_inde	(sub-)adult_of_NB_taxa	PLA_SC	3	2	Corse2	IN	1	0	0.3	0.0236696	Corse2_IN_1_0_Spic_inde	0.3	0.0236696
1005	Spic_inde_(sub-)adult_of_NB_taxa	Spic_inde	(sub-)adult_of_NB_taxa	PLA_SC	3	2	Spain	IN	2	0	0	0	Spain_IN_2_0_Spic_inde	0	0
1006	Spic_inde_(sub-)adult_of_NB_taxa	Spic_inde	(sub-)adult_of_NB_taxa	PLA_SC	3	2	Sardinia	OUT	1	0	0	0	Sardinia_OUT_1_0_Spic_inde	0	0
1007	Spic_inde_(sub-)adult_of_NB_taxa	Spic_inde	(sub-)adult_of_NB_taxa	PLA_SC	3	2	Corse2	IN	2	0	0	0	Corse2_IN_2_0_Spic_inde	0	0
1008	Spic_inde_(sub-)adult_of_NB_taxa	Spic_inde	(sub-)adult_of_NB_taxa	PLA_SC	3	2	Corse2	OUT	3	0	0.101	6.10963	Corse2_OUT_3_0_Spic_inde	0.101	6.10963
1009	Spon_cant_(sub-)adult_of_NB_taxa	Spon_cant	(sub-)adult_of_NB_taxa	CA_NB	3	4	Spain	OUT	1	0	0.012	1.63942	Spain_OUT_1_0_Spon_cant	0.012	1.63942
1010	Spon_cant_(sub-)adult_of_NB_taxa	Spon_cant	(sub-)adult_of_NB_taxa	CA_NB	3	4	Corse2	OUT	3	0	0	0	Corse2_OUT_3_0_Spon_cant	0	0
1011	Spon_cant_(sub-)adult_of_NB_taxa	Spon_cant	(sub-)adult_of_NB_taxa	CA_NB	3	4	Sardinia	IN	1	0	0	0	Sardinia_IN_1_0_Spon_cant	0	0
1012	Spon_cant_(sub-)adult_of_NB_taxa	Spon_cant	(sub-)adult_of_NB_taxa	CA_NB	3	4	Spain	OUT	2	0	0.002	0.230399	Spain_OUT_2_0_Spon_cant	0.002	0.230399
1013	Spon_cant_(sub-)adult_of_NB_taxa	Spon_cant	(sub-)adult_of_NB_taxa	CA_NB	3	4	Spain	IN	1	0	0.081	12.7941	Spain_IN_1_0_Spon_cant	0.081	12.7941
1014	Spon_cant_(sub-)adult_of_NB_taxa	Spon_cant	(sub-)adult_of_NB_taxa	CA_NB	3	4	Sardinia	OUT	2	0	0	0	Sardinia_OUT_2_0_Spon_cant	0	0
1015	Spon_cant_(sub-)adult_of_NB_taxa	Spon_cant	(sub-)adult_of_NB_taxa	CA_NB	3	4	Corse2	IN	4	0	0	0	Corse2_IN_4_0_Spon_cant	0	0
1016	Spon_cant_(sub-)adult_of_NB_taxa	Spon_cant	(sub-)adult_of_NB_taxa	CA_NB	3	4	Spain	IN	3	0	0	0	Spain_IN_3_0_Spon_cant	0	0
1017	Spon_cant_(sub-)adult_of_NB_taxa	Spon_cant	(sub-)adult_of_NB_taxa	CA_NB	3	4	Corse2	IN	2	0	0.008	0.158424	Corse2_IN_2_0_Spon_cant	0.008	0.158424
1018	Spon_cant_(sub-)adult_of_NB_taxa	Spon_cant	(sub-)adult_of_NB_taxa	CA_NB	3	4	Corse2	IN	1	0	0.334	93.5303	Corse2_IN_1_0_Spon_cant	0.334	93.5303
1019	Spon_cant_(sub-)adult_of_NB_taxa	Spon_cant	(sub-)adult_of_NB_taxa	CA_NB	3	4	Corse2	IN	3	0	0.034	1.84487	Corse2_IN_3_0_Spon_cant	0.034	1.84487
1020	Spon_cant_(sub-)adult_of_NB_taxa	Spon_cant	(sub-)adult_of_NB_taxa	CA_NB	3	4	Sardinia	IN	4	0	0.002	0.230399	Sardinia_IN_4_0_Spon_cant	0.002	0.230399
1021	Spon_cant_(sub-)adult_of_NB_taxa	Spon_cant	(sub-)adult_of_NB_taxa	CA_NB	3	4	Sardinia	OUT	1	0	0.008	0.434086	Sardinia_OUT_1_0_Spon_cant	0.008	0.434086
1022	Spon_cant_(sub-)adult_of_NB_taxa	Spon_cant	(sub-)adult_of_NB_taxa	CA_NB	3	4	Sardinia	OUT	3	0	0	0	Sardinia_OUT_3_0_Spon_cant	0	0
1023	Spon_cant_(sub-)adult_of_NB_taxa	Spon_cant	(sub-)adult_of_NB_taxa	CA_NB	3	4	Corse2	OUT	4	0	0.012	0.450448	Corse2_OUT_4_0_Spon_cant	0.012	0.450448
1024	Spon_cant_(sub-)adult_of_NB_taxa	Spon_cant	(sub-)adult_of_NB_taxa	CA_NB	3	4	Spain	IN	2	0	0.018	2.15909	Spain_IN_2_0_Spon_cant	0.018	2.15909
1025	Spon_cant_(sub-)adult_of_NB_taxa	Spon_cant	(sub-)adult_of_NB_taxa	CA_NB	3	4	Corse2	OUT	2	0	0.062	2.494	Corse2_OUT_2_0_Spon_cant	0.062	2.494
1026	Spon_cant_(sub-)adult_of_NB_taxa	Spon_cant	(sub-)adult_of_NB_taxa	CA_NB	3	4	Corse2	OUT	1	0	0.002	0.230399	Corse2_OUT_1_0_Spon_cant	0.002	0.230399
1027	Spon_cant_(sub-)adult_of_NB_taxa	Spon_cant	(sub-)adult_of_NB_taxa	CA_NB	3	4	Sardinia	OUT	4	0	0.002	0.161898	Sardinia_OUT_4_0_Spon_cant	0.002	0.161898
1028	Spon_cant_(sub-)adult_of_NB_taxa	Spon_cant	(sub-)adult_of_NB_taxa	CA_NB	3	4	Spain	OUT	4	0	0.004	0.323797	Spain_OUT_4_0_Spon_cant	0.004	0.323797
1029	Spon_cant_(sub-)adult_of_NB_taxa	Spon_cant	(sub-)adult_of_NB_taxa	CA_NB	3	4	Spain	IN	4	0	0.155	42.2728	Spain_IN_4_0_Spon_cant	0.155	42.2728
1030	Spon_cant_(sub-)adult_of_NB_taxa	Spon_cant	(sub-)adult_of_NB_taxa	CA_NB	3	4	Sardinia	IN	3	0	0.006	2.44454	Sardinia_IN_3_0_Spon_cant	0.006	2.44454
1031	Spon_cant_(sub-)adult_of_NB_taxa	Spon_cant	(sub-)adult_of_NB_taxa	CA_NB	3	4	Spain	OUT	3	0	0	0	Spain_OUT_3_0_Spon_cant	0	0
1032	Spon_cant_(sub-)adult_of_NB_taxa	Spon_cant	(sub-)adult_of_NB_taxa	CA_NB	3	4	Sardinia	IN	2	0	0	0	Sardinia_IN_2_0_Spon_cant	0	0
1033	Spon_cant_CB_juvenile_of_NB_taxa	Spon_cant	CB_juvenile_of_NB_taxa	CA_CB	2	3	Corse2	IN	3	1	0	0	Corse2_IN_3_1_Spon_cant	0	0
1034	Spon_cant_CB_juvenile_of_NB_taxa	Spon_cant	CB_juvenile_of_NB_taxa	CA_CB	2	3	Sardinia	IN	4	1	0	0	Sardinia_IN_4_1_Spon_cant	0	0
1035	Spon_cant_CB_juvenile_of_NB_taxa	Spon_cant	CB_juvenile_of_NB_taxa	CA_CB	2	3	Sardinia	IN	3	1	0	0	Sardinia_IN_3_1_Spon_cant	0	0
1036	Spon_cant_CB_juvenile_of_NB_taxa	Spon_cant	CB_juvenile_of_NB_taxa	CA_CB	2	3	Corse2	OUT	1	1	0	0	Corse2_OUT_1_1_Spon_cant	0	0
1037	Spon_cant_CB_juvenile_of_NB_taxa	Spon_cant	CB_juvenile_of_NB_taxa	CA_CB	2	3	Corse2	OUT	3	1	0	0	Corse2_OUT_3_1_Spon_cant	0	0
1038	Spon_cant_CB_juvenile_of_NB_taxa	Spon_cant	CB_juvenile_of_NB_taxa	CA_CB	2	3	Spain	IN	4	1	0	0	Spain_IN_4_1_Spon_cant	0	0
1039	Spon_cant_CB_juvenile_of_NB_taxa	Spon_cant	CB_juvenile_of_NB_taxa	CA_CB	2	3	Corse2	IN	4	1	0	0	Corse2_IN_4_1_Spon_cant	0	0
1040	Spon_cant_CB_juvenile_of_NB_taxa	Spon_cant	CB_juvenile_of_NB_taxa	CA_CB	2	3	Spain	OUT	2	1	0	0	Spain_OUT_2_1_Spon_cant	0	0
1041	Spon_cant_CB_juvenile_of_NB_taxa	Spon_cant	CB_juvenile_of_NB_taxa	CA_CB	2	3	Corse2	IN	1	1	0	0	Corse2_IN_1_1_Spon_cant	0	0
1042	Spon_cant_CB_juvenile_of_NB_taxa	Spon_cant	CB_juvenile_of_NB_taxa	CA_CB	2	3	Sardinia	OUT	4	1	0	0	Sardinia_OUT_4_1_Spon_cant	0	0
1043	Spon_cant_CB_juvenile_of_NB_taxa	Spon_cant	CB_juvenile_of_NB_taxa	CA_CB	2	3	Spain	OUT	3	1	0	0	Spain_OUT_3_1_Spon_cant	0	0
1044	Spon_cant_CB_juvenile_of_NB_taxa	Spon_cant	CB_juvenile_of_NB_taxa	CA_CB	2	3	Spain	OUT	1	1	0	0	Spain_OUT_1_1_Spon_cant	0	0
1045	Spon_cant_CB_juvenile_of_NB_taxa	Spon_cant	CB_juvenile_of_NB_taxa	CA_CB	2	3	Spain	OUT	4	1	0	0	Spain_OUT_4_1_Spon_cant	0	0
1046	Spon_cant_CB_juvenile_of_NB_taxa	Spon_cant	CB_juvenile_of_NB_taxa	CA_CB	2	3	Corse2	OUT	4	1	0	0	Corse2_OUT_4_1_Spon_cant	0	0
1047	Spon_cant_CB_juvenile_of_NB_taxa	Spon_cant	CB_juvenile_of_NB_taxa	CA_CB	2	3	Sardinia	OUT	1	1	0	0	Sardinia_OUT_1_1_Spon_cant	0	0
1048	Spon_cant_CB_juvenile_of_NB_taxa	Spon_cant	CB_juvenile_of_NB_taxa	CA_CB	2	3	Spain	IN	1	1	0	0	Spain_IN_1_1_Spon_cant	0	0
1049	Spon_cant_CB_juvenile_of_NB_taxa	Spon_cant	CB_juvenile_of_NB_taxa	CA_CB	2	3	Corse2	IN	2	1	0.025	0.0039881	Corse2_IN_2_1_Spon_cant	0.025	0.0039881
1050	Spon_cant_CB_juvenile_of_NB_taxa	Spon_cant	CB_juvenile_of_NB_taxa	CA_CB	2	3	Sardinia	OUT	2	1	0	0	Sardinia_OUT_2_1_Spon_cant	0	0
1051	Spon_cant_CB_juvenile_of_NB_taxa	Spon_cant	CB_juvenile_of_NB_taxa	CA_CB	2	3	Sardinia	IN	1	1	0	0	Sardinia_IN_1_1_Spon_cant	0	0
1052	Spon_cant_CB_juvenile_of_NB_taxa	Spon_cant	CB_juvenile_of_NB_taxa	CA_CB	2	3	Sardinia	IN	2	1	0	0	Sardinia_IN_2_1_Spon_cant	0	0
1053	Spon_cant_CB_juvenile_of_NB_taxa	Spon_cant	CB_juvenile_of_NB_taxa	CA_CB	2	3	Sardinia	OUT	3	1	0	0	Sardinia_OUT_3_1_Spon_cant	0	0
1054	Spon_cant_CB_juvenile_of_NB_taxa	Spon_cant	CB_juvenile_of_NB_taxa	CA_CB	2	3	Corse2	OUT	2	1	0	0	Corse2_OUT_2_1_Spon_cant	0	0
1055	Spon_cant_CB_juvenile_of_NB_taxa	Spon_cant	CB_juvenile_of_NB_taxa	CA_CB	2	3	Spain	IN	3	1	0	0	Spain_IN_3_1_Spon_cant	0	0
1056	Spon_cant_CB_juvenile_of_NB_taxa	Spon_cant	CB_juvenile_of_NB_taxa	CA_CB	2	3	Spain	IN	2	1	0	0	Spain_IN_2_1_Spon_cant	0	0
1057	Symp_cine_(sub-)adult_of_NB_taxa	Symp_cine	(sub-)adult_of_NB_taxa	CA_NB	3	4	Spain	OUT	2	0	0	0	Spain_OUT_2_0_Symp_cine	0	0
1058	Symp_cine_(sub-)adult_of_NB_taxa	Symp_cine	(sub-)adult_of_NB_taxa	CA_NB	3	4	Corse2	IN	1	0	0	0	Corse2_IN_1_0_Symp_cine	0	0
1059	Symp_cine_(sub-)adult_of_NB_taxa	Symp_cine	(sub-)adult_of_NB_taxa	CA_NB	3	4	Corse2	IN	4	0	0	0	Corse2_IN_4_0_Symp_cine	0	0
1060	Symp_cine_(sub-)adult_of_NB_taxa	Symp_cine	(sub-)adult_of_NB_taxa	CA_NB	3	4	Sardinia	OUT	3	0	0	0	Sardinia_OUT_3_0_Symp_cine	0	0
1061	Symp_cine_(sub-)adult_of_NB_taxa	Symp_cine	(sub-)adult_of_NB_taxa	CA_NB	3	4	Sardinia	OUT	4	0	0	0	Sardinia_OUT_4_0_Symp_cine	0	0
1062	Symp_cine_(sub-)adult_of_NB_taxa	Symp_cine	(sub-)adult_of_NB_taxa	CA_NB	3	4	Spain	IN	3	0	0	0	Spain_IN_3_0_Symp_cine	0	0
1063	Symp_cine_(sub-)adult_of_NB_taxa	Symp_cine	(sub-)adult_of_NB_taxa	CA_NB	3	4	Spain	OUT	4	0	0	0	Spain_OUT_4_0_Symp_cine	0	0
1064	Symp_cine_(sub-)adult_of_NB_taxa	Symp_cine	(sub-)adult_of_NB_taxa	CA_NB	3	4	Spain	IN	1	0	0	0	Spain_IN_1_0_Symp_cine	0	0
1065	Symp_cine_(sub-)adult_of_NB_taxa	Symp_cine	(sub-)adult_of_NB_taxa	CA_NB	3	4	Sardinia	OUT	1	0	0	0	Sardinia_OUT_1_0_Symp_cine	0	0
1066	Symp_cine_(sub-)adult_of_NB_taxa	Symp_cine	(sub-)adult_of_NB_taxa	CA_NB	3	4	Spain	OUT	3	0	0	0	Spain_OUT_3_0_Symp_cine	0	0
1067	Symp_cine_(sub-)adult_of_NB_taxa	Symp_cine	(sub-)adult_of_NB_taxa	CA_NB	3	4	Sardinia	OUT	2	0	0	0	Sardinia_OUT_2_0_Symp_cine	0	0
1068	Symp_cine_(sub-)adult_of_NB_taxa	Symp_cine	(sub-)adult_of_NB_taxa	CA_NB	3	4	Spain	IN	2	0	0	0	Spain_IN_2_0_Symp_cine	0	0
1069	Symp_cine_(sub-)adult_of_NB_taxa	Symp_cine	(sub-)adult_of_NB_taxa	CA_NB	3	4	Sardinia	IN	4	0	0	0	Sardinia_IN_4_0_Symp_cine	0	0
1070	Symp_cine_(sub-)adult_of_NB_taxa	Symp_cine	(sub-)adult_of_NB_taxa	CA_NB	3	4	Sardinia	IN	2	0	0	0	Sardinia_IN_2_0_Symp_cine	0	0
1071	Symp_cine_(sub-)adult_of_NB_taxa	Symp_cine	(sub-)adult_of_NB_taxa	CA_NB	3	4	Corse2	OUT	3	0	0	0	Corse2_OUT_3_0_Symp_cine	0	0
1072	Symp_cine_(sub-)adult_of_NB_taxa	Symp_cine	(sub-)adult_of_NB_taxa	CA_NB	3	4	Sardinia	IN	3	0	0	0	Sardinia_IN_3_0_Symp_cine	0	0
1073	Symp_cine_(sub-)adult_of_NB_taxa	Symp_cine	(sub-)adult_of_NB_taxa	CA_NB	3	4	Corse2	OUT	4	0	0	0	Corse2_OUT_4_0_Symp_cine	0	0
1074	Symp_cine_(sub-)adult_of_NB_taxa	Symp_cine	(sub-)adult_of_NB_taxa	CA_NB	3	4	Corse2	OUT	2	0	0.002	0.0269793	Corse2_OUT_2_0_Symp_cine	0.002	0.0269793
1075	Symp_cine_(sub-)adult_of_NB_taxa	Symp_cine	(sub-)adult_of_NB_taxa	CA_NB	3	4	Corse2	IN	3	0	0	0	Corse2_IN_3_0_Symp_cine	0	0
1076	Symp_cine_(sub-)adult_of_NB_taxa	Symp_cine	(sub-)adult_of_NB_taxa	CA_NB	3	4	Spain	OUT	1	0	0	0	Spain_OUT_1_0_Symp_cine	0	0
1077	Symp_cine_(sub-)adult_of_NB_taxa	Symp_cine	(sub-)adult_of_NB_taxa	CA_NB	3	4	Corse2	OUT	1	0	0	0	Corse2_OUT_1_0_Symp_cine	0	0
1078	Symp_cine_(sub-)adult_of_NB_taxa	Symp_cine	(sub-)adult_of_NB_taxa	CA_NB	3	4	Spain	IN	4	0	0	0	Spain_IN_4_0_Symp_cine	0	0
1079	Symp_cine_(sub-)adult_of_NB_taxa	Symp_cine	(sub-)adult_of_NB_taxa	CA_NB	3	4	Sardinia	IN	1	0	0	0	Sardinia_IN_1_0_Symp_cine	0	0
1080	Symp_cine_(sub-)adult_of_NB_taxa	Symp_cine	(sub-)adult_of_NB_taxa	CA_NB	3	4	Corse2	IN	2	0	0	0	Corse2_IN_2_0_Symp_cine	0	0
1081	Symp_dode_(sub-)adult_of_NB_taxa	Symp_dode	(sub-)adult_of_NB_taxa	CA_NB	3	4	Sardinia	OUT	1	0	0	0	Sardinia_OUT_1_0_Symp_dode	0	0
1082	Symp_dode_(sub-)adult_of_NB_taxa	Symp_dode	(sub-)adult_of_NB_taxa	CA_NB	3	4	Corse2	OUT	3	0	0	0	Corse2_OUT_3_0_Symp_dode	0	0
1083	Symp_dode_(sub-)adult_of_NB_taxa	Symp_dode	(sub-)adult_of_NB_taxa	CA_NB	3	4	Corse2	IN	4	0	0	0	Corse2_IN_4_0_Symp_dode	0	0
1084	Symp_dode_(sub-)adult_of_NB_taxa	Symp_dode	(sub-)adult_of_NB_taxa	CA_NB	3	4	Sardinia	IN	2	0	0.018	0.260179	Sardinia_IN_2_0_Symp_dode	0.018	0.260179
1085	Symp_dode_(sub-)adult_of_NB_taxa	Symp_dode	(sub-)adult_of_NB_taxa	CA_NB	3	4	Corse2	IN	2	0	0	0	Corse2_IN_2_0_Symp_dode	0	0
1086	Symp_dode_(sub-)adult_of_NB_taxa	Symp_dode	(sub-)adult_of_NB_taxa	CA_NB	3	4	Sardinia	OUT	3	0	0	0	Sardinia_OUT_3_0_Symp_dode	0	0
1087	Symp_dode_(sub-)adult_of_NB_taxa	Symp_dode	(sub-)adult_of_NB_taxa	CA_NB	3	4	Sardinia	OUT	4	0	0	0	Sardinia_OUT_4_0_Symp_dode	0	0
1088	Symp_dode_(sub-)adult_of_NB_taxa	Symp_dode	(sub-)adult_of_NB_taxa	CA_NB	3	4	Spain	OUT	4	0	0	0	Spain_OUT_4_0_Symp_dode	0	0
1089	Symp_dode_(sub-)adult_of_NB_taxa	Symp_dode	(sub-)adult_of_NB_taxa	CA_NB	3	4	Corse2	IN	1	0	0	0	Corse2_IN_1_0_Symp_dode	0	0
1090	Symp_dode_(sub-)adult_of_NB_taxa	Symp_dode	(sub-)adult_of_NB_taxa	CA_NB	3	4	Spain	OUT	3	0	0	0	Spain_OUT_3_0_Symp_dode	0	0
1091	Symp_dode_(sub-)adult_of_NB_taxa	Symp_dode	(sub-)adult_of_NB_taxa	CA_NB	3	4	Spain	OUT	1	0	0	0	Spain_OUT_1_0_Symp_dode	0	0
1092	Symp_dode_(sub-)adult_of_NB_taxa	Symp_dode	(sub-)adult_of_NB_taxa	CA_NB	3	4	Spain	IN	1	0	0.002	0.0514331	Spain_IN_1_0_Symp_dode	0.002	0.0514331
1093	Symp_dode_(sub-)adult_of_NB_taxa	Symp_dode	(sub-)adult_of_NB_taxa	CA_NB	3	4	Sardinia	IN	3	0	0	0	Sardinia_IN_3_0_Symp_dode	0	0
1094	Symp_dode_(sub-)adult_of_NB_taxa	Symp_dode	(sub-)adult_of_NB_taxa	CA_NB	3	4	Sardinia	OUT	2	0	0	0	Sardinia_OUT_2_0_Symp_dode	0	0
1095	Symp_dode_(sub-)adult_of_NB_taxa	Symp_dode	(sub-)adult_of_NB_taxa	CA_NB	3	4	Spain	IN	2	0	0.008	0.115635	Spain_IN_2_0_Symp_dode	0.008	0.115635
1096	Symp_dode_(sub-)adult_of_NB_taxa	Symp_dode	(sub-)adult_of_NB_taxa	CA_NB	3	4	Spain	OUT	2	0	0	0	Spain_OUT_2_0_Symp_dode	0	0
1097	Symp_dode_(sub-)adult_of_NB_taxa	Symp_dode	(sub-)adult_of_NB_taxa	CA_NB	3	4	Corse2	OUT	2	0	0	0	Corse2_OUT_2_0_Symp_dode	0	0
1098	Symp_dode_(sub-)adult_of_NB_taxa	Symp_dode	(sub-)adult_of_NB_taxa	CA_NB	3	4	Corse2	IN	3	0	0	0	Corse2_IN_3_0_Symp_dode	0	0
1099	Symp_dode_(sub-)adult_of_NB_taxa	Symp_dode	(sub-)adult_of_NB_taxa	CA_NB	3	4	Sardinia	IN	4	0	0.014	0.272961	Sardinia_IN_4_0_Symp_dode	0.014	0.272961
1100	Symp_dode_(sub-)adult_of_NB_taxa	Symp_dode	(sub-)adult_of_NB_taxa	CA_NB	3	4	Corse2	OUT	4	0	0	0	Corse2_OUT_4_0_Symp_dode	0	0
1101	Symp_dode_(sub-)adult_of_NB_taxa	Symp_dode	(sub-)adult_of_NB_taxa	CA_NB	3	4	Spain	IN	4	0	0	0	Spain_IN_4_0_Symp_dode	0	0
1102	Symp_dode_(sub-)adult_of_NB_taxa	Symp_dode	(sub-)adult_of_NB_taxa	CA_NB	3	4	Corse2	OUT	1	0	0	0	Corse2_OUT_1_0_Symp_dode	0	0
1103	Symp_dode_(sub-)adult_of_NB_taxa	Symp_dode	(sub-)adult_of_NB_taxa	CA_NB	3	4	Spain	IN	3	0	0.002	0.0289088	Spain_IN_3_0_Symp_dode	0.002	0.0289088
1104	Symp_dode_(sub-)adult_of_NB_taxa	Symp_dode	(sub-)adult_of_NB_taxa	CA_NB	3	4	Sardinia	IN	1	0	0.016	0.202017	Sardinia_IN_1_0_Symp_dode	0.016	0.202017
1105	Symp_dode_CB_juvenile_of_NB_taxa	Symp_dode	CB_juvenile_of_NB_taxa	CA_CB	2	3	Corse2	IN	3	1	0	0	Corse2_IN_3_1_Symp_dode	0	0
1106	Symp_dode_CB_juvenile_of_NB_taxa	Symp_dode	CB_juvenile_of_NB_taxa	CA_CB	2	3	Corse2	IN	1	1	0	0	Corse2_IN_1_1_Symp_dode	0	0
1107	Symp_dode_CB_juvenile_of_NB_taxa	Symp_dode	CB_juvenile_of_NB_taxa	CA_CB	2	3	Spain	OUT	2	1	0	0	Spain_OUT_2_1_Symp_dode	0	0
1108	Symp_dode_CB_juvenile_of_NB_taxa	Symp_dode	CB_juvenile_of_NB_taxa	CA_CB	2	3	Spain	OUT	1	1	0	0	Spain_OUT_1_1_Symp_dode	0	0
1109	Symp_dode_CB_juvenile_of_NB_taxa	Symp_dode	CB_juvenile_of_NB_taxa	CA_CB	2	3	Sardinia	OUT	2	1	0	0	Sardinia_OUT_2_1_Symp_dode	0	0
1110	Symp_dode_CB_juvenile_of_NB_taxa	Symp_dode	CB_juvenile_of_NB_taxa	CA_CB	2	3	Spain	IN	1	1	0	0	Spain_IN_1_1_Symp_dode	0	0
1111	Symp_dode_CB_juvenile_of_NB_taxa	Symp_dode	CB_juvenile_of_NB_taxa	CA_CB	2	3	Corse2	OUT	2	1	0	0	Corse2_OUT_2_1_Symp_dode	0	0
1112	Symp_dode_CB_juvenile_of_NB_taxa	Symp_dode	CB_juvenile_of_NB_taxa	CA_CB	2	3	Sardinia	OUT	1	1	0	0	Sardinia_OUT_1_1_Symp_dode	0	0
1113	Symp_dode_CB_juvenile_of_NB_taxa	Symp_dode	CB_juvenile_of_NB_taxa	CA_CB	2	3	Sardinia	IN	2	1	0.175	0.139813	Sardinia_IN_2_1_Symp_dode	0.175	0.139813
1114	Symp_dode_CB_juvenile_of_NB_taxa	Symp_dode	CB_juvenile_of_NB_taxa	CA_CB	2	3	Sardinia	IN	4	1	0.55	0.165413	Sardinia_IN_4_1_Symp_dode	0.55	0.165413
1115	Symp_dode_CB_juvenile_of_NB_taxa	Symp_dode	CB_juvenile_of_NB_taxa	CA_CB	2	3	Sardinia	IN	3	1	0.025	0.0199733	Sardinia_IN_3_1_Symp_dode	0.025	0.0199733
1116	Symp_dode_CB_juvenile_of_NB_taxa	Symp_dode	CB_juvenile_of_NB_taxa	CA_CB	2	3	Corse2	OUT	3	1	0	0	Corse2_OUT_3_1_Symp_dode	0	0
1117	Symp_dode_CB_juvenile_of_NB_taxa	Symp_dode	CB_juvenile_of_NB_taxa	CA_CB	2	3	Sardinia	OUT	3	1	0	0	Sardinia_OUT_3_1_Symp_dode	0	0
1118	Symp_dode_CB_juvenile_of_NB_taxa	Symp_dode	CB_juvenile_of_NB_taxa	CA_CB	2	3	Corse2	IN	2	1	0	0	Corse2_IN_2_1_Symp_dode	0	0
1119	Symp_dode_CB_juvenile_of_NB_taxa	Symp_dode	CB_juvenile_of_NB_taxa	CA_CB	2	3	Sardinia	IN	1	1	0.075	0.00670372	Sardinia_IN_1_1_Symp_dode	0.075	0.00670372
1120	Symp_dode_CB_juvenile_of_NB_taxa	Symp_dode	CB_juvenile_of_NB_taxa	CA_CB	2	3	Corse2	OUT	1	1	0	0	Corse2_OUT_1_1_Symp_dode	0	0
1121	Symp_dode_CB_juvenile_of_NB_taxa	Symp_dode	CB_juvenile_of_NB_taxa	CA_CB	2	3	Spain	IN	3	1	0	0	Spain_IN_3_1_Symp_dode	0	0
1122	Symp_dode_CB_juvenile_of_NB_taxa	Symp_dode	CB_juvenile_of_NB_taxa	CA_CB	2	3	Spain	OUT	4	1	0	0	Spain_OUT_4_1_Symp_dode	0	0
1123	Symp_dode_CB_juvenile_of_NB_taxa	Symp_dode	CB_juvenile_of_NB_taxa	CA_CB	2	3	Corse2	OUT	4	1	0	0	Corse2_OUT_4_1_Symp_dode	0	0
1124	Symp_dode_CB_juvenile_of_NB_taxa	Symp_dode	CB_juvenile_of_NB_taxa	CA_CB	2	3	Sardinia	OUT	4	1	0	0	Sardinia_OUT_4_1_Symp_dode	0	0
1125	Symp_dode_CB_juvenile_of_NB_taxa	Symp_dode	CB_juvenile_of_NB_taxa	CA_CB	2	3	Corse2	IN	4	1	0	0	Corse2_IN_4_1_Symp_dode	0	0
1126	Symp_dode_CB_juvenile_of_NB_taxa	Symp_dode	CB_juvenile_of_NB_taxa	CA_CB	2	3	Spain	IN	4	1	0	0	Spain_IN_4_1_Symp_dode	0	0
1127	Symp_dode_CB_juvenile_of_NB_taxa	Symp_dode	CB_juvenile_of_NB_taxa	CA_CB	2	3	Spain	IN	2	1	0.025	0.00804717	Spain_IN_2_1_Symp_dode	0.025	0.00804717
1128	Symp_dode_CB_juvenile_of_NB_taxa	Symp_dode	CB_juvenile_of_NB_taxa	CA_CB	2	3	Spain	OUT	3	1	0	0	Spain_OUT_3_1_Symp_dode	0	0
1129	Symp_medi_(sub-)adult_of_NB_taxa	Symp_medi	(sub-)adult_of_NB_taxa	CA_NB	3	4	Spain	OUT	3	0	0.006	0.0355335	Spain_OUT_3_0_Symp_medi	0.006	0.0355335
1130	Symp_medi_(sub-)adult_of_NB_taxa	Symp_medi	(sub-)adult_of_NB_taxa	CA_NB	3	4	Sardinia	IN	2	0	0.032	0.822952	Sardinia_IN_2_0_Symp_medi	0.032	0.822952
1131	Symp_medi_(sub-)adult_of_NB_taxa	Symp_medi	(sub-)adult_of_NB_taxa	CA_NB	3	4	Spain	OUT	2	0	0.004	0.0283952	Spain_OUT_2_0_Symp_medi	0.004	0.0283952
1132	Symp_medi_(sub-)adult_of_NB_taxa	Symp_medi	(sub-)adult_of_NB_taxa	CA_NB	3	4	Spain	IN	1	0	0.014	0.205716	Spain_IN_1_0_Symp_medi	0.014	0.205716
1133	Symp_medi_(sub-)adult_of_NB_taxa	Symp_medi	(sub-)adult_of_NB_taxa	CA_NB	3	4	Corse2	IN	1	0	0.048	0.934315	Corse2_IN_1_0_Symp_medi	0.048	0.934315
1134	Symp_medi_(sub-)adult_of_NB_taxa	Symp_medi	(sub-)adult_of_NB_taxa	CA_NB	3	4	Sardinia	OUT	4	0	0	0	Sardinia_OUT_4_0_Symp_medi	0	0
1135	Symp_medi_(sub-)adult_of_NB_taxa	Symp_medi	(sub-)adult_of_NB_taxa	CA_NB	3	4	Corse2	OUT	3	0	0.016	0.203444	Corse2_OUT_3_0_Symp_medi	0.016	0.203444
1136	Symp_medi_(sub-)adult_of_NB_taxa	Symp_medi	(sub-)adult_of_NB_taxa	CA_NB	3	4	Sardinia	IN	3	0	0.006	0.198045	Sardinia_IN_3_0_Symp_medi	0.006	0.198045
1137	Symp_medi_(sub-)adult_of_NB_taxa	Symp_medi	(sub-)adult_of_NB_taxa	CA_NB	3	4	Sardinia	OUT	3	0	0.004	0.0646239	Sardinia_OUT_3_0_Symp_medi	0.004	0.0646239
1138	Symp_medi_(sub-)adult_of_NB_taxa	Symp_medi	(sub-)adult_of_NB_taxa	CA_NB	3	4	Spain	OUT	1	0	0.008	0.534345	Spain_OUT_1_0_Symp_medi	0.008	0.534345
1139	Symp_medi_(sub-)adult_of_NB_taxa	Symp_medi	(sub-)adult_of_NB_taxa	CA_NB	3	4	Sardinia	IN	4	0	0.008	0.214282	Sardinia_IN_4_0_Symp_medi	0.008	0.214282
1140	Symp_medi_(sub-)adult_of_NB_taxa	Symp_medi	(sub-)adult_of_NB_taxa	CA_NB	3	4	Spain	IN	4	0	0.006	0.064815	Spain_IN_4_0_Symp_medi	0.006	0.064815
1141	Symp_medi_(sub-)adult_of_NB_taxa	Symp_medi	(sub-)adult_of_NB_taxa	CA_NB	3	4	Sardinia	IN	1	0	0.022	0.397005	Sardinia_IN_1_0_Symp_medi	0.022	0.397005
1142	Symp_medi_(sub-)adult_of_NB_taxa	Symp_medi	(sub-)adult_of_NB_taxa	CA_NB	3	4	Sardinia	OUT	2	0	0.00266667	0.0548347	Sardinia_OUT_2_0_Symp_medi	0.00266667	0.0548347
1143	Symp_medi_(sub-)adult_of_NB_taxa	Symp_medi	(sub-)adult_of_NB_taxa	CA_NB	3	4	Corse2	OUT	1	0	0.004	0.023689	Corse2_OUT_1_0_Symp_medi	0.004	0.023689
1144	Symp_medi_(sub-)adult_of_NB_taxa	Symp_medi	(sub-)adult_of_NB_taxa	CA_NB	3	4	Spain	IN	3	0	0	0	Spain_IN_3_0_Symp_medi	0	0
1145	Symp_medi_(sub-)adult_of_NB_taxa	Symp_medi	(sub-)adult_of_NB_taxa	CA_NB	3	4	Corse2	IN	2	0	0.01	0.11749	Corse2_IN_2_0_Symp_medi	0.01	0.11749
1146	Symp_medi_(sub-)adult_of_NB_taxa	Symp_medi	(sub-)adult_of_NB_taxa	CA_NB	3	4	Sardinia	OUT	1	0	0	0	Sardinia_OUT_1_0_Symp_medi	0	0
1147	Symp_medi_(sub-)adult_of_NB_taxa	Symp_medi	(sub-)adult_of_NB_taxa	CA_NB	3	4	Corse2	IN	4	0	0	0	Corse2_IN_4_0_Symp_medi	0	0
1148	Symp_medi_(sub-)adult_of_NB_taxa	Symp_medi	(sub-)adult_of_NB_taxa	CA_NB	3	4	Corse2	OUT	4	0	0.008	0.297512	Corse2_OUT_4_0_Symp_medi	0.008	0.297512
1149	Symp_medi_(sub-)adult_of_NB_taxa	Symp_medi	(sub-)adult_of_NB_taxa	CA_NB	3	4	Spain	OUT	4	0	0.004	0.0460233	Spain_OUT_4_0_Symp_medi	0.004	0.0460233
1150	Symp_medi_(sub-)adult_of_NB_taxa	Symp_medi	(sub-)adult_of_NB_taxa	CA_NB	3	4	Corse2	OUT	2	0	0.004	0.023689	Corse2_OUT_2_0_Symp_medi	0.004	0.023689
1151	Symp_medi_(sub-)adult_of_NB_taxa	Symp_medi	(sub-)adult_of_NB_taxa	CA_NB	3	4	Corse2	IN	3	0	0	0	Corse2_IN_3_0_Symp_medi	0	0
1152	Symp_medi_(sub-)adult_of_NB_taxa	Symp_medi	(sub-)adult_of_NB_taxa	CA_NB	3	4	Spain	IN	2	0	0.008	0.142483	Spain_IN_2_0_Symp_medi	0.008	0.142483
1153	Symp_medi_CB_juvenile_of_NB_taxa	Symp_medi	CB_juvenile_of_NB_taxa	CA_CB	2	3	Sardinia	IN	2	1	0.125	0.0881524	Sardinia_IN_2_1_Symp_medi	0.125	0.0881524
1154	Symp_medi_CB_juvenile_of_NB_taxa	Symp_medi	CB_juvenile_of_NB_taxa	CA_CB	2	3	Sardinia	OUT	1	1	0	0	Sardinia_OUT_1_1_Symp_medi	0	0
1155	Symp_medi_CB_juvenile_of_NB_taxa	Symp_medi	CB_juvenile_of_NB_taxa	CA_CB	2	3	Spain	IN	3	1	0.025	0.00728958	Spain_IN_3_1_Symp_medi	0.025	0.00728958
1156	Symp_medi_CB_juvenile_of_NB_taxa	Symp_medi	CB_juvenile_of_NB_taxa	CA_CB	2	3	Sardinia	IN	3	1	0.025	0.0176305	Sardinia_IN_3_1_Symp_medi	0.025	0.0176305
1157	Symp_medi_CB_juvenile_of_NB_taxa	Symp_medi	CB_juvenile_of_NB_taxa	CA_CB	2	3	Spain	IN	4	1	0.025	0.0176305	Spain_IN_4_1_Symp_medi	0.025	0.0176305
1158	Symp_medi_CB_juvenile_of_NB_taxa	Symp_medi	CB_juvenile_of_NB_taxa	CA_CB	2	3	Spain	OUT	2	1	0	0	Spain_OUT_2_1_Symp_medi	0	0
1159	Symp_medi_CB_juvenile_of_NB_taxa	Symp_medi	CB_juvenile_of_NB_taxa	CA_CB	2	3	Corse2	IN	4	1	0	0	Corse2_IN_4_1_Symp_medi	0	0
1160	Symp_medi_CB_juvenile_of_NB_taxa	Symp_medi	CB_juvenile_of_NB_taxa	CA_CB	2	3	Spain	OUT	4	1	0.025	0.00209943	Spain_OUT_4_1_Symp_medi	0.025	0.00209943
1161	Symp_medi_CB_juvenile_of_NB_taxa	Symp_medi	CB_juvenile_of_NB_taxa	CA_CB	2	3	Spain	OUT	1	1	0	0	Spain_OUT_1_1_Symp_medi	0	0
1162	Symp_medi_CB_juvenile_of_NB_taxa	Symp_medi	CB_juvenile_of_NB_taxa	CA_CB	2	3	Corse2	IN	3	1	0	0	Corse2_IN_3_1_Symp_medi	0	0
1163	Symp_medi_CB_juvenile_of_NB_taxa	Symp_medi	CB_juvenile_of_NB_taxa	CA_CB	2	3	Corse2	OUT	3	1	0	0	Corse2_OUT_3_1_Symp_medi	0	0
1164	Symp_medi_CB_juvenile_of_NB_taxa	Symp_medi	CB_juvenile_of_NB_taxa	CA_CB	2	3	Sardinia	OUT	2	1	0	0	Sardinia_OUT_2_1_Symp_medi	0	0
1165	Symp_medi_CB_juvenile_of_NB_taxa	Symp_medi	CB_juvenile_of_NB_taxa	CA_CB	2	3	Sardinia	IN	1	1	0	0	Sardinia_IN_1_1_Symp_medi	0	0
1166	Symp_medi_CB_juvenile_of_NB_taxa	Symp_medi	CB_juvenile_of_NB_taxa	CA_CB	2	3	Sardinia	OUT	3	1	0	0	Sardinia_OUT_3_1_Symp_medi	0	0
1167	Symp_medi_CB_juvenile_of_NB_taxa	Symp_medi	CB_juvenile_of_NB_taxa	CA_CB	2	3	Spain	OUT	3	1	0	0	Spain_OUT_3_1_Symp_medi	0	0
1168	Symp_medi_CB_juvenile_of_NB_taxa	Symp_medi	CB_juvenile_of_NB_taxa	CA_CB	2	3	Spain	IN	1	1	0.025	0.00728958	Spain_IN_1_1_Symp_medi	0.025	0.00728958
1169	Symp_medi_CB_juvenile_of_NB_taxa	Symp_medi	CB_juvenile_of_NB_taxa	CA_CB	2	3	Corse2	OUT	1	1	0	0	Corse2_OUT_1_1_Symp_medi	0	0
1170	Symp_medi_CB_juvenile_of_NB_taxa	Symp_medi	CB_juvenile_of_NB_taxa	CA_CB	2	3	Sardinia	OUT	4	1	0	0	Sardinia_OUT_4_1_Symp_medi	0	0
1171	Symp_medi_CB_juvenile_of_NB_taxa	Symp_medi	CB_juvenile_of_NB_taxa	CA_CB	2	3	Corse2	IN	1	1	0	0	Corse2_IN_1_1_Symp_medi	0	0
1172	Symp_medi_CB_juvenile_of_NB_taxa	Symp_medi	CB_juvenile_of_NB_taxa	CA_CB	2	3	Sardinia	IN	4	1	0	0	Sardinia_IN_4_1_Symp_medi	0	0
1173	Symp_medi_CB_juvenile_of_NB_taxa	Symp_medi	CB_juvenile_of_NB_taxa	CA_CB	2	3	Spain	IN	2	1	0	0	Spain_IN_2_1_Symp_medi	0	0
1174	Symp_medi_CB_juvenile_of_NB_taxa	Symp_medi	CB_juvenile_of_NB_taxa	CA_CB	2	3	Corse2	OUT	2	1	0	0	Corse2_OUT_2_1_Symp_medi	0	0
1175	Symp_medi_CB_juvenile_of_NB_taxa	Symp_medi	CB_juvenile_of_NB_taxa	CA_CB	2	3	Corse2	IN	2	1	0	0	Corse2_IN_2_1_Symp_medi	0	0
1176	Symp_medi_CB_juvenile_of_NB_taxa	Symp_medi	CB_juvenile_of_NB_taxa	CA_CB	2	3	Corse2	OUT	4	1	0	0	Corse2_OUT_4_1_Symp_medi	0	0
1177	Symp_mela_(sub-)adult_of_NB_taxa	Symp_mela	(sub-)adult_of_NB_taxa	CA_NB	3	4	Spain	IN	3	0	0	0	Spain_IN_3_0_Symp_mela	0	0
1178	Symp_mela_(sub-)adult_of_NB_taxa	Symp_mela	(sub-)adult_of_NB_taxa	CA_NB	3	4	Corse2	OUT	1	0	0.006	0.0330614	Corse2_OUT_1_0_Symp_mela	0.006	0.0330614
1179	Symp_mela_(sub-)adult_of_NB_taxa	Symp_mela	(sub-)adult_of_NB_taxa	CA_NB	3	4	Spain	OUT	4	0	0	0	Spain_OUT_4_0_Symp_mela	0	0
1180	Symp_mela_(sub-)adult_of_NB_taxa	Symp_mela	(sub-)adult_of_NB_taxa	CA_NB	3	4	Corse2	OUT	3	0	0.008	0.141569	Corse2_OUT_3_0_Symp_mela	0.008	0.141569
1181	Symp_mela_(sub-)adult_of_NB_taxa	Symp_mela	(sub-)adult_of_NB_taxa	CA_NB	3	4	Sardinia	OUT	4	0	0	0	Sardinia_OUT_4_0_Symp_mela	0	0
1182	Symp_mela_(sub-)adult_of_NB_taxa	Symp_mela	(sub-)adult_of_NB_taxa	CA_NB	3	4	Corse2	IN	2	0	0	0	Corse2_IN_2_0_Symp_mela	0	0
1183	Symp_mela_(sub-)adult_of_NB_taxa	Symp_mela	(sub-)adult_of_NB_taxa	CA_NB	3	4	Spain	OUT	3	0	0	0	Spain_OUT_3_0_Symp_mela	0	0
1184	Symp_mela_(sub-)adult_of_NB_taxa	Symp_mela	(sub-)adult_of_NB_taxa	CA_NB	3	4	Sardinia	OUT	3	0	0	0	Sardinia_OUT_3_0_Symp_mela	0	0
1185	Symp_mela_(sub-)adult_of_NB_taxa	Symp_mela	(sub-)adult_of_NB_taxa	CA_NB	3	4	Sardinia	IN	4	0	0.002	0.130865	Sardinia_IN_4_0_Symp_mela	0.002	0.130865
1186	Symp_mela_(sub-)adult_of_NB_taxa	Symp_mela	(sub-)adult_of_NB_taxa	CA_NB	3	4	Corse2	IN	4	0	0.01	0.0376632	Corse2_IN_4_0_Symp_mela	0.01	0.0376632
1187	Symp_mela_(sub-)adult_of_NB_taxa	Symp_mela	(sub-)adult_of_NB_taxa	CA_NB	3	4	Sardinia	IN	2	0	0.002	0.0252383	Sardinia_IN_2_0_Symp_mela	0.002	0.0252383
1188	Symp_mela_(sub-)adult_of_NB_taxa	Symp_mela	(sub-)adult_of_NB_taxa	CA_NB	3	4	Spain	IN	4	0	0	0	Spain_IN_4_0_Symp_mela	0	0
1189	Symp_mela_(sub-)adult_of_NB_taxa	Symp_mela	(sub-)adult_of_NB_taxa	CA_NB	3	4	Corse2	IN	1	0	0.084	0.64958	Corse2_IN_1_0_Symp_mela	0.084	0.64958
1190	Symp_mela_(sub-)adult_of_NB_taxa	Symp_mela	(sub-)adult_of_NB_taxa	CA_NB	3	4	Corse2	OUT	2	0	0	0	Corse2_OUT_2_0_Symp_mela	0	0
1191	Symp_mela_(sub-)adult_of_NB_taxa	Symp_mela	(sub-)adult_of_NB_taxa	CA_NB	3	4	Spain	IN	2	0	0.01	0.107824	Spain_IN_2_0_Symp_mela	0.01	0.107824
1192	Symp_mela_(sub-)adult_of_NB_taxa	Symp_mela	(sub-)adult_of_NB_taxa	CA_NB	3	4	Spain	OUT	1	0	0	0	Spain_OUT_1_0_Symp_mela	0	0
1193	Symp_mela_(sub-)adult_of_NB_taxa	Symp_mela	(sub-)adult_of_NB_taxa	CA_NB	3	4	Corse2	IN	3	0	0.004	0.0270235	Corse2_IN_3_0_Symp_mela	0.004	0.0270235
1194	Symp_mela_(sub-)adult_of_NB_taxa	Symp_mela	(sub-)adult_of_NB_taxa	CA_NB	3	4	Sardinia	OUT	2	0	0	0	Sardinia_OUT_2_0_Symp_mela	0	0
1195	Symp_mela_(sub-)adult_of_NB_taxa	Symp_mela	(sub-)adult_of_NB_taxa	CA_NB	3	4	Corse2	OUT	4	0	0.002	0.00603787	Corse2_OUT_4_0_Symp_mela	0.002	0.00603787
1196	Symp_mela_(sub-)adult_of_NB_taxa	Symp_mela	(sub-)adult_of_NB_taxa	CA_NB	3	4	Sardinia	IN	3	0	0.004	0.0672884	Sardinia_IN_3_0_Symp_mela	0.004	0.0672884
1197	Symp_mela_(sub-)adult_of_NB_taxa	Symp_mela	(sub-)adult_of_NB_taxa	CA_NB	3	4	Sardinia	IN	1	0	0.002	0.0252383	Sardinia_IN_1_0_Symp_mela	0.002	0.0252383
1198	Symp_mela_(sub-)adult_of_NB_taxa	Symp_mela	(sub-)adult_of_NB_taxa	CA_NB	3	4	Sardinia	OUT	1	0	0	0	Sardinia_OUT_1_0_Symp_mela	0	0
1199	Symp_mela_(sub-)adult_of_NB_taxa	Symp_mela	(sub-)adult_of_NB_taxa	CA_NB	3	4	Spain	OUT	2	0	0	0	Spain_OUT_2_0_Symp_mela	0	0
1200	Symp_mela_(sub-)adult_of_NB_taxa	Symp_mela	(sub-)adult_of_NB_taxa	CA_NB	3	4	Spain	IN	1	0	0	0	Spain_IN_1_0_Symp_mela	0	0
1201	Symp_ocel_(sub-)adult_of_NB_taxa	Symp_ocel	(sub-)adult_of_NB_taxa	CA_NB	3	4	Spain	IN	4	0	0.004	0.0373302	Spain_IN_4_0_Symp_ocel	0.004	0.0373302
1202	Symp_ocel_(sub-)adult_of_NB_taxa	Symp_ocel	(sub-)adult_of_NB_taxa	CA_NB	3	4	Sardinia	IN	2	0	0	0	Sardinia_IN_2_0_Symp_ocel	0	0
1203	Symp_ocel_(sub-)adult_of_NB_taxa	Symp_ocel	(sub-)adult_of_NB_taxa	CA_NB	3	4	Sardinia	OUT	1	0	0	0	Sardinia_OUT_1_0_Symp_ocel	0	0
1204	Symp_ocel_(sub-)adult_of_NB_taxa	Symp_ocel	(sub-)adult_of_NB_taxa	CA_NB	3	4	Corse2	OUT	3	0	0.002	0.00962071	Corse2_OUT_3_0_Symp_ocel	0.002	0.00962071
1205	Symp_ocel_(sub-)adult_of_NB_taxa	Symp_ocel	(sub-)adult_of_NB_taxa	CA_NB	3	4	Corse2	IN	3	0	0.004	0.101405	Corse2_IN_3_0_Symp_ocel	0.004	0.101405
1206	Symp_ocel_(sub-)adult_of_NB_taxa	Symp_ocel	(sub-)adult_of_NB_taxa	CA_NB	3	4	Corse2	IN	1	0	0.03	0.760539	Corse2_IN_1_0_Symp_ocel	0.03	0.760539
1207	Symp_ocel_(sub-)adult_of_NB_taxa	Symp_ocel	(sub-)adult_of_NB_taxa	CA_NB	3	4	Sardinia	IN	4	0	0.008	0.252169	Sardinia_IN_4_0_Symp_ocel	0.008	0.252169
1208	Symp_ocel_(sub-)adult_of_NB_taxa	Symp_ocel	(sub-)adult_of_NB_taxa	CA_NB	3	4	Spain	IN	1	0	0.002	0.0320773	Spain_IN_1_0_Symp_ocel	0.002	0.0320773
1209	Symp_ocel_(sub-)adult_of_NB_taxa	Symp_ocel	(sub-)adult_of_NB_taxa	CA_NB	3	4	Sardinia	IN	3	0	0	0	Sardinia_IN_3_0_Symp_ocel	0	0
1210	Symp_ocel_(sub-)adult_of_NB_taxa	Symp_ocel	(sub-)adult_of_NB_taxa	CA_NB	3	4	Corse2	IN	2	0	0	0	Corse2_IN_2_0_Symp_ocel	0	0
1211	Symp_ocel_(sub-)adult_of_NB_taxa	Symp_ocel	(sub-)adult_of_NB_taxa	CA_NB	3	4	Corse2	IN	4	0	0	0	Corse2_IN_4_0_Symp_ocel	0	0
1212	Symp_ocel_(sub-)adult_of_NB_taxa	Symp_ocel	(sub-)adult_of_NB_taxa	CA_NB	3	4	Spain	IN	3	0	0.008	0.0384829	Spain_IN_3_0_Symp_ocel	0.008	0.0384829
1213	Symp_ocel_(sub-)adult_of_NB_taxa	Symp_ocel	(sub-)adult_of_NB_taxa	CA_NB	3	4	Sardinia	OUT	4	0	0	0	Sardinia_OUT_4_0_Symp_ocel	0	0
1214	Symp_ocel_(sub-)adult_of_NB_taxa	Symp_ocel	(sub-)adult_of_NB_taxa	CA_NB	3	4	Sardinia	IN	1	0	0.008	0.184185	Sardinia_IN_1_0_Symp_ocel	0.008	0.184185
1215	Symp_ocel_(sub-)adult_of_NB_taxa	Symp_ocel	(sub-)adult_of_NB_taxa	CA_NB	3	4	Sardinia	OUT	3	0	0	0	Sardinia_OUT_3_0_Symp_ocel	0	0
1216	Symp_ocel_(sub-)adult_of_NB_taxa	Symp_ocel	(sub-)adult_of_NB_taxa	CA_NB	3	4	Corse2	OUT	2	0	0.014	0.111408	Corse2_OUT_2_0_Symp_ocel	0.014	0.111408
1217	Symp_ocel_(sub-)adult_of_NB_taxa	Symp_ocel	(sub-)adult_of_NB_taxa	CA_NB	3	4	Corse2	OUT	1	0	0.004	0.00818784	Corse2_OUT_1_0_Symp_ocel	0.004	0.00818784
1218	Symp_ocel_(sub-)adult_of_NB_taxa	Symp_ocel	(sub-)adult_of_NB_taxa	CA_NB	3	4	Spain	OUT	3	0	0.012	0.0848574	Spain_OUT_3_0_Symp_ocel	0.012	0.0848574
1219	Symp_ocel_(sub-)adult_of_NB_taxa	Symp_ocel	(sub-)adult_of_NB_taxa	CA_NB	3	4	Spain	OUT	1	0	0.018	0.0956308	Spain_OUT_1_0_Symp_ocel	0.018	0.0956308
1220	Symp_ocel_(sub-)adult_of_NB_taxa	Symp_ocel	(sub-)adult_of_NB_taxa	CA_NB	3	4	Sardinia	OUT	2	0	0	0	Sardinia_OUT_2_0_Symp_ocel	0	0
1221	Symp_ocel_(sub-)adult_of_NB_taxa	Symp_ocel	(sub-)adult_of_NB_taxa	CA_NB	3	4	Spain	OUT	2	0	0.002	0.0753818	Spain_OUT_2_0_Symp_ocel	0.002	0.0753818
1222	Symp_ocel_(sub-)adult_of_NB_taxa	Symp_ocel	(sub-)adult_of_NB_taxa	CA_NB	3	4	Spain	OUT	4	0	0.01	0.106738	Spain_OUT_4_0_Symp_ocel	0.01	0.106738
1223	Symp_ocel_(sub-)adult_of_NB_taxa	Symp_ocel	(sub-)adult_of_NB_taxa	CA_NB	3	4	Spain	IN	2	0	0	0	Spain_IN_2_0_Symp_ocel	0	0
1224	Symp_ocel_(sub-)adult_of_NB_taxa	Symp_ocel	(sub-)adult_of_NB_taxa	CA_NB	3	4	Corse2	OUT	4	0	0	0	Corse2_OUT_4_0_Symp_ocel	0	0
1225	Symp_ocel_CB_juvenile_of_NB_taxa	Symp_ocel	CB_juvenile_of_NB_taxa	CA_CB	2	3	Spain	IN	3	1	0.025	0.0153482	Spain_IN_3_1_Symp_ocel	0.025	0.0153482
1226	Symp_ocel_CB_juvenile_of_NB_taxa	Symp_ocel	CB_juvenile_of_NB_taxa	CA_CB	2	3	Spain	OUT	2	1	0.05	0.0173071	Spain_OUT_2_1_Symp_ocel	0.05	0.0173071
1227	Symp_ocel_CB_juvenile_of_NB_taxa	Symp_ocel	CB_juvenile_of_NB_taxa	CA_CB	2	3	Sardinia	IN	1	1	0	0	Sardinia_IN_1_1_Symp_ocel	0	0
1228	Symp_ocel_CB_juvenile_of_NB_taxa	Symp_ocel	CB_juvenile_of_NB_taxa	CA_CB	2	3	Sardinia	IN	2	1	0	0	Sardinia_IN_2_1_Symp_ocel	0	0
1229	Symp_ocel_CB_juvenile_of_NB_taxa	Symp_ocel	CB_juvenile_of_NB_taxa	CA_CB	2	3	Corse2	IN	1	1	0	0	Corse2_IN_1_1_Symp_ocel	0	0
1230	Symp_ocel_CB_juvenile_of_NB_taxa	Symp_ocel	CB_juvenile_of_NB_taxa	CA_CB	2	3	Sardinia	IN	4	1	0	0	Sardinia_IN_4_1_Symp_ocel	0	0
1231	Symp_ocel_CB_juvenile_of_NB_taxa	Symp_ocel	CB_juvenile_of_NB_taxa	CA_CB	2	3	Spain	OUT	3	1	0	0	Spain_OUT_3_1_Symp_ocel	0	0
1232	Symp_ocel_CB_juvenile_of_NB_taxa	Symp_ocel	CB_juvenile_of_NB_taxa	CA_CB	2	3	Spain	IN	1	1	0.025	0.0153482	Spain_IN_1_1_Symp_ocel	0.025	0.0153482
1233	Symp_ocel_CB_juvenile_of_NB_taxa	Symp_ocel	CB_juvenile_of_NB_taxa	CA_CB	2	3	Sardinia	OUT	1	1	0	0	Sardinia_OUT_1_1_Symp_ocel	0	0
1234	Symp_ocel_CB_juvenile_of_NB_taxa	Symp_ocel	CB_juvenile_of_NB_taxa	CA_CB	2	3	Sardinia	OUT	3	1	0	0	Sardinia_OUT_3_1_Symp_ocel	0	0
1235	Symp_ocel_CB_juvenile_of_NB_taxa	Symp_ocel	CB_juvenile_of_NB_taxa	CA_CB	2	3	Corse2	OUT	1	1	0	0	Corse2_OUT_1_1_Symp_ocel	0	0
1236	Symp_ocel_CB_juvenile_of_NB_taxa	Symp_ocel	CB_juvenile_of_NB_taxa	CA_CB	2	3	Corse2	OUT	3	1	0	0	Corse2_OUT_3_1_Symp_ocel	0	0
1237	Symp_ocel_CB_juvenile_of_NB_taxa	Symp_ocel	CB_juvenile_of_NB_taxa	CA_CB	2	3	Spain	OUT	4	1	0	0	Spain_OUT_4_1_Symp_ocel	0	0
1238	Symp_ocel_CB_juvenile_of_NB_taxa	Symp_ocel	CB_juvenile_of_NB_taxa	CA_CB	2	3	Sardinia	OUT	2	1	0	0	Sardinia_OUT_2_1_Symp_ocel	0	0
1239	Symp_ocel_CB_juvenile_of_NB_taxa	Symp_ocel	CB_juvenile_of_NB_taxa	CA_CB	2	3	Spain	IN	2	1	0	0	Spain_IN_2_1_Symp_ocel	0	0
1240	Symp_ocel_CB_juvenile_of_NB_taxa	Symp_ocel	CB_juvenile_of_NB_taxa	CA_CB	2	3	Corse2	IN	3	1	0.125	0.0767411	Corse2_IN_3_1_Symp_ocel	0.125	0.0767411
1241	Symp_ocel_CB_juvenile_of_NB_taxa	Symp_ocel	CB_juvenile_of_NB_taxa	CA_CB	2	3	Sardinia	IN	3	1	0	0	Sardinia_IN_3_1_Symp_ocel	0	0
1242	Symp_ocel_CB_juvenile_of_NB_taxa	Symp_ocel	CB_juvenile_of_NB_taxa	CA_CB	2	3	Corse2	IN	2	1	0	0	Corse2_IN_2_1_Symp_ocel	0	0
1243	Symp_ocel_CB_juvenile_of_NB_taxa	Symp_ocel	CB_juvenile_of_NB_taxa	CA_CB	2	3	Corse2	OUT	4	1	0	0	Corse2_OUT_4_1_Symp_ocel	0	0
1244	Symp_ocel_CB_juvenile_of_NB_taxa	Symp_ocel	CB_juvenile_of_NB_taxa	CA_CB	2	3	Corse2	OUT	2	1	0	0	Corse2_OUT_2_1_Symp_ocel	0	0
1245	Symp_ocel_CB_juvenile_of_NB_taxa	Symp_ocel	CB_juvenile_of_NB_taxa	CA_CB	2	3	Sardinia	OUT	4	1	0	0	Sardinia_OUT_4_1_Symp_ocel	0	0
1246	Symp_ocel_CB_juvenile_of_NB_taxa	Symp_ocel	CB_juvenile_of_NB_taxa	CA_CB	2	3	Spain	OUT	1	1	0	0	Spain_OUT_1_1_Symp_ocel	0	0
1247	Symp_ocel_CB_juvenile_of_NB_taxa	Symp_ocel	CB_juvenile_of_NB_taxa	CA_CB	2	3	Corse2	IN	4	1	0	0	Corse2_IN_4_1_Symp_ocel	0	0
1248	Symp_ocel_CB_juvenile_of_NB_taxa	Symp_ocel	CB_juvenile_of_NB_taxa	CA_CB	2	3	Spain	IN	4	1	0.525	0.0411357	Spain_IN_4_1_Symp_ocel	0.525	0.0411357
1249	Symp_rois_(sub-)adult_of_NB_taxa	Symp_rois	(sub-)adult_of_NB_taxa	CA_NB	3	4	Sardinia	IN	1	0	0	0	Sardinia_IN_1_0_Symp_rois	0	0
1250	Symp_rois_(sub-)adult_of_NB_taxa	Symp_rois	(sub-)adult_of_NB_taxa	CA_NB	3	4	Spain	IN	1	0	0.002	0.0280641	Spain_IN_1_0_Symp_rois	0.002	0.0280641
1251	Symp_rois_(sub-)adult_of_NB_taxa	Symp_rois	(sub-)adult_of_NB_taxa	CA_NB	3	4	Spain	OUT	3	0	0.002	0.0154668	Spain_OUT_3_0_Symp_rois	0.002	0.0154668
1252	Symp_rois_(sub-)adult_of_NB_taxa	Symp_rois	(sub-)adult_of_NB_taxa	CA_NB	3	4	Spain	IN	4	0	0	0	Spain_IN_4_0_Symp_rois	0	0
1253	Symp_rois_(sub-)adult_of_NB_taxa	Symp_rois	(sub-)adult_of_NB_taxa	CA_NB	3	4	Spain	OUT	2	0	0	0	Spain_OUT_2_0_Symp_rois	0	0
1254	Symp_rois_(sub-)adult_of_NB_taxa	Symp_rois	(sub-)adult_of_NB_taxa	CA_NB	3	4	Sardinia	OUT	3	0	0.01	0.0773342	Sardinia_OUT_3_0_Symp_rois	0.01	0.0773342
1255	Symp_rois_(sub-)adult_of_NB_taxa	Symp_rois	(sub-)adult_of_NB_taxa	CA_NB	3	4	Sardinia	OUT	1	0	0	0	Sardinia_OUT_1_0_Symp_rois	0	0
1256	Symp_rois_(sub-)adult_of_NB_taxa	Symp_rois	(sub-)adult_of_NB_taxa	CA_NB	3	4	Spain	IN	3	0	0	0	Spain_IN_3_0_Symp_rois	0	0
1257	Symp_rois_(sub-)adult_of_NB_taxa	Symp_rois	(sub-)adult_of_NB_taxa	CA_NB	3	4	Sardinia	IN	3	0	0	0	Sardinia_IN_3_0_Symp_rois	0	0
1258	Symp_rois_(sub-)adult_of_NB_taxa	Symp_rois	(sub-)adult_of_NB_taxa	CA_NB	3	4	Corse2	IN	1	0	0.036	1.03621	Corse2_IN_1_0_Symp_rois	0.036	1.03621
1259	Symp_rois_(sub-)adult_of_NB_taxa	Symp_rois	(sub-)adult_of_NB_taxa	CA_NB	3	4	Sardinia	IN	4	0	0.002	0.0689149	Sardinia_IN_4_0_Symp_rois	0.002	0.0689149
1260	Symp_rois_(sub-)adult_of_NB_taxa	Symp_rois	(sub-)adult_of_NB_taxa	CA_NB	3	4	Corse2	OUT	1	0	0.01	0.18423	Corse2_OUT_1_0_Symp_rois	0.01	0.18423
1261	Symp_rois_(sub-)adult_of_NB_taxa	Symp_rois	(sub-)adult_of_NB_taxa	CA_NB	3	4	Sardinia	OUT	2	0	0	0	Sardinia_OUT_2_0_Symp_rois	0	0
1262	Symp_rois_(sub-)adult_of_NB_taxa	Symp_rois	(sub-)adult_of_NB_taxa	CA_NB	3	4	Spain	OUT	4	0	0.01	0.0899315	Spain_OUT_4_0_Symp_rois	0.01	0.0899315
1263	Symp_rois_(sub-)adult_of_NB_taxa	Symp_rois	(sub-)adult_of_NB_taxa	CA_NB	3	4	Corse2	IN	4	0	0.012	0.155199	Corse2_IN_4_0_Symp_rois	0.012	0.155199
1264	Symp_rois_(sub-)adult_of_NB_taxa	Symp_rois	(sub-)adult_of_NB_taxa	CA_NB	3	4	Spain	IN	2	0	0	0	Spain_IN_2_0_Symp_rois	0	0
1265	Symp_rois_(sub-)adult_of_NB_taxa	Symp_rois	(sub-)adult_of_NB_taxa	CA_NB	3	4	Sardinia	OUT	4	0	0	0	Sardinia_OUT_4_0_Symp_rois	0	0
1266	Symp_rois_(sub-)adult_of_NB_taxa	Symp_rois	(sub-)adult_of_NB_taxa	CA_NB	3	4	Corse2	OUT	4	0	0.008	0.115315	Corse2_OUT_4_0_Symp_rois	0.008	0.115315
1267	Symp_rois_(sub-)adult_of_NB_taxa	Symp_rois	(sub-)adult_of_NB_taxa	CA_NB	3	4	Corse2	OUT	2	0	0.01	0.127723	Corse2_OUT_2_0_Symp_rois	0.01	0.127723
1268	Symp_rois_(sub-)adult_of_NB_taxa	Symp_rois	(sub-)adult_of_NB_taxa	CA_NB	3	4	Spain	OUT	1	0	0.004	0.0561282	Spain_OUT_1_0_Symp_rois	0.004	0.0561282
1269	Symp_rois_(sub-)adult_of_NB_taxa	Symp_rois	(sub-)adult_of_NB_taxa	CA_NB	3	4	Corse2	IN	3	0	0.002	0.0280641	Corse2_IN_3_0_Symp_rois	0.002	0.0280641
1270	Symp_rois_(sub-)adult_of_NB_taxa	Symp_rois	(sub-)adult_of_NB_taxa	CA_NB	3	4	Sardinia	IN	2	0	0	0	Sardinia_IN_2_0_Symp_rois	0	0
1271	Symp_rois_(sub-)adult_of_NB_taxa	Symp_rois	(sub-)adult_of_NB_taxa	CA_NB	3	4	Corse2	IN	2	0	0.004	0.052838	Corse2_IN_2_0_Symp_rois	0.004	0.052838
1272	Symp_rois_(sub-)adult_of_NB_taxa	Symp_rois	(sub-)adult_of_NB_taxa	CA_NB	3	4	Corse2	OUT	3	0	0	0	Corse2_OUT_3_0_Symp_rois	0	0
1273	Symp_rois_CB_juvenile_of_NB_taxa	Symp_rois	CB_juvenile_of_NB_taxa	CA_CB	2	3	Spain	IN	1	1	0	0	Spain_IN_1_1_Symp_rois	0	0
1274	Symp_rois_CB_juvenile_of_NB_taxa	Symp_rois	CB_juvenile_of_NB_taxa	CA_CB	2	3	Corse2	OUT	1	1	0.025	0.0303782	Corse2_OUT_1_1_Symp_rois	0.025	0.0303782
1275	Symp_rois_CB_juvenile_of_NB_taxa	Symp_rois	CB_juvenile_of_NB_taxa	CA_CB	2	3	Spain	IN	3	1	0	0	Spain_IN_3_1_Symp_rois	0	0
1276	Symp_rois_CB_juvenile_of_NB_taxa	Symp_rois	CB_juvenile_of_NB_taxa	CA_CB	2	3	Corse2	IN	2	1	0	0	Corse2_IN_2_1_Symp_rois	0	0
1277	Symp_rois_CB_juvenile_of_NB_taxa	Symp_rois	CB_juvenile_of_NB_taxa	CA_CB	2	3	Sardinia	IN	2	1	0	0	Sardinia_IN_2_1_Symp_rois	0	0
1278	Symp_rois_CB_juvenile_of_NB_taxa	Symp_rois	CB_juvenile_of_NB_taxa	CA_CB	2	3	Spain	OUT	1	1	0	0	Spain_OUT_1_1_Symp_rois	0	0
1279	Symp_rois_CB_juvenile_of_NB_taxa	Symp_rois	CB_juvenile_of_NB_taxa	CA_CB	2	3	Spain	OUT	4	1	0	0	Spain_OUT_4_1_Symp_rois	0	0
1280	Symp_rois_CB_juvenile_of_NB_taxa	Symp_rois	CB_juvenile_of_NB_taxa	CA_CB	2	3	Corse2	IN	1	1	0	0	Corse2_IN_1_1_Symp_rois	0	0
1281	Symp_rois_CB_juvenile_of_NB_taxa	Symp_rois	CB_juvenile_of_NB_taxa	CA_CB	2	3	Sardinia	IN	4	1	0	0	Sardinia_IN_4_1_Symp_rois	0	0
1282	Symp_rois_CB_juvenile_of_NB_taxa	Symp_rois	CB_juvenile_of_NB_taxa	CA_CB	2	3	Spain	OUT	3	1	0	0	Spain_OUT_3_1_Symp_rois	0	0
1283	Symp_rois_CB_juvenile_of_NB_taxa	Symp_rois	CB_juvenile_of_NB_taxa	CA_CB	2	3	Sardinia	OUT	1	1	0	0	Sardinia_OUT_1_1_Symp_rois	0	0
1284	Symp_rois_CB_juvenile_of_NB_taxa	Symp_rois	CB_juvenile_of_NB_taxa	CA_CB	2	3	Spain	IN	2	1	0	0	Spain_IN_2_1_Symp_rois	0	0
1285	Symp_rois_CB_juvenile_of_NB_taxa	Symp_rois	CB_juvenile_of_NB_taxa	CA_CB	2	3	Sardinia	OUT	3	1	0	0	Sardinia_OUT_3_1_Symp_rois	0	0
1286	Symp_rois_CB_juvenile_of_NB_taxa	Symp_rois	CB_juvenile_of_NB_taxa	CA_CB	2	3	Sardinia	OUT	2	1	0	0	Sardinia_OUT_2_1_Symp_rois	0	0
1287	Symp_rois_CB_juvenile_of_NB_taxa	Symp_rois	CB_juvenile_of_NB_taxa	CA_CB	2	3	Corse2	IN	3	1	0	0	Corse2_IN_3_1_Symp_rois	0	0
1288	Symp_rois_CB_juvenile_of_NB_taxa	Symp_rois	CB_juvenile_of_NB_taxa	CA_CB	2	3	Sardinia	IN	3	1	0	0	Sardinia_IN_3_1_Symp_rois	0	0
1289	Symp_rois_CB_juvenile_of_NB_taxa	Symp_rois	CB_juvenile_of_NB_taxa	CA_CB	2	3	Spain	IN	4	1	0	0	Spain_IN_4_1_Symp_rois	0	0
1290	Symp_rois_CB_juvenile_of_NB_taxa	Symp_rois	CB_juvenile_of_NB_taxa	CA_CB	2	3	Sardinia	OUT	4	1	0	0	Sardinia_OUT_4_1_Symp_rois	0	0
1291	Symp_rois_CB_juvenile_of_NB_taxa	Symp_rois	CB_juvenile_of_NB_taxa	CA_CB	2	3	Corse2	OUT	3	1	0	0	Corse2_OUT_3_1_Symp_rois	0	0
1292	Symp_rois_CB_juvenile_of_NB_taxa	Symp_rois	CB_juvenile_of_NB_taxa	CA_CB	2	3	Sardinia	IN	1	1	0	0	Sardinia_IN_1_1_Symp_rois	0	0
1293	Symp_rois_CB_juvenile_of_NB_taxa	Symp_rois	CB_juvenile_of_NB_taxa	CA_CB	2	3	Corse2	OUT	2	1	0	0	Corse2_OUT_2_1_Symp_rois	0	0
1294	Symp_rois_CB_juvenile_of_NB_taxa	Symp_rois	CB_juvenile_of_NB_taxa	CA_CB	2	3	Corse2	OUT	4	1	0	0	Corse2_OUT_4_1_Symp_rois	0	0
1295	Symp_rois_CB_juvenile_of_NB_taxa	Symp_rois	CB_juvenile_of_NB_taxa	CA_CB	2	3	Corse2	IN	4	1	0.025	0.0303782	Corse2_IN_4_1_Symp_rois	0.025	0.0303782
1296	Symp_rois_CB_juvenile_of_NB_taxa	Symp_rois	CB_juvenile_of_NB_taxa	CA_CB	2	3	Spain	OUT	2	1	0	0	Spain_OUT_2_1_Symp_rois	0	0
1297	Symp_rost_(sub-)adult_of_NB_taxa	Symp_rost	(sub-)adult_of_NB_taxa	CA_NB	3	4	Sardinia	OUT	3	0	0	0	Sardinia_OUT_3_0_Symp_rost	0	0
1298	Symp_rost_(sub-)adult_of_NB_taxa	Symp_rost	(sub-)adult_of_NB_taxa	CA_NB	3	4	Spain	IN	2	0	0	0	Spain_IN_2_0_Symp_rost	0	0
1299	Symp_rost_(sub-)adult_of_NB_taxa	Symp_rost	(sub-)adult_of_NB_taxa	CA_NB	3	4	Sardinia	OUT	2	0	0	0	Sardinia_OUT_2_0_Symp_rost	0	0
1300	Symp_rost_(sub-)adult_of_NB_taxa	Symp_rost	(sub-)adult_of_NB_taxa	CA_NB	3	4	Sardinia	OUT	1	0	0.004	0.196152	Sardinia_OUT_1_0_Symp_rost	0.004	0.196152
1301	Symp_rost_(sub-)adult_of_NB_taxa	Symp_rost	(sub-)adult_of_NB_taxa	CA_NB	3	4	Spain	OUT	1	0	0	0	Spain_OUT_1_0_Symp_rost	0	0
1302	Symp_rost_(sub-)adult_of_NB_taxa	Symp_rost	(sub-)adult_of_NB_taxa	CA_NB	3	4	Corse2	OUT	2	0	0.004	0.248839	Corse2_OUT_2_0_Symp_rost	0.004	0.248839
1303	Symp_rost_(sub-)adult_of_NB_taxa	Symp_rost	(sub-)adult_of_NB_taxa	CA_NB	3	4	Spain	OUT	3	0	0	0	Spain_OUT_3_0_Symp_rost	0	0
1304	Symp_rost_(sub-)adult_of_NB_taxa	Symp_rost	(sub-)adult_of_NB_taxa	CA_NB	3	4	Spain	IN	4	0	0	0	Spain_IN_4_0_Symp_rost	0	0
1305	Symp_rost_(sub-)adult_of_NB_taxa	Symp_rost	(sub-)adult_of_NB_taxa	CA_NB	3	4	Corse2	OUT	4	0	0	0	Corse2_OUT_4_0_Symp_rost	0	0
1306	Symp_rost_(sub-)adult_of_NB_taxa	Symp_rost	(sub-)adult_of_NB_taxa	CA_NB	3	4	Spain	IN	1	0	0	0	Spain_IN_1_0_Symp_rost	0	0
1307	Symp_rost_(sub-)adult_of_NB_taxa	Symp_rost	(sub-)adult_of_NB_taxa	CA_NB	3	4	Sardinia	OUT	4	0	0	0	Sardinia_OUT_4_0_Symp_rost	0	0
1308	Symp_rost_(sub-)adult_of_NB_taxa	Symp_rost	(sub-)adult_of_NB_taxa	CA_NB	3	4	Spain	OUT	2	0	0.002	0.0980759	Spain_OUT_2_0_Symp_rost	0.002	0.0980759
1309	Symp_rost_(sub-)adult_of_NB_taxa	Symp_rost	(sub-)adult_of_NB_taxa	CA_NB	3	4	Sardinia	IN	2	0	0.002	0.0331917	Sardinia_IN_2_0_Symp_rost	0.002	0.0331917
1310	Symp_rost_(sub-)adult_of_NB_taxa	Symp_rost	(sub-)adult_of_NB_taxa	CA_NB	3	4	Spain	IN	3	0	0	0	Spain_IN_3_0_Symp_rost	0	0
1311	Symp_rost_(sub-)adult_of_NB_taxa	Symp_rost	(sub-)adult_of_NB_taxa	CA_NB	3	4	Corse2	IN	3	0	0	0	Corse2_IN_3_0_Symp_rost	0	0
1312	Symp_rost_(sub-)adult_of_NB_taxa	Symp_rost	(sub-)adult_of_NB_taxa	CA_NB	3	4	Sardinia	IN	3	0	0	0	Sardinia_IN_3_0_Symp_rost	0	0
1313	Symp_rost_(sub-)adult_of_NB_taxa	Symp_rost	(sub-)adult_of_NB_taxa	CA_NB	3	4	Corse2	IN	2	0	0	0	Corse2_IN_2_0_Symp_rost	0	0
1314	Symp_rost_(sub-)adult_of_NB_taxa	Symp_rost	(sub-)adult_of_NB_taxa	CA_NB	3	4	Spain	OUT	4	0	0	0	Spain_OUT_4_0_Symp_rost	0	0
1315	Symp_rost_(sub-)adult_of_NB_taxa	Symp_rost	(sub-)adult_of_NB_taxa	CA_NB	3	4	Corse2	IN	1	0	0.006	0.019222	Corse2_IN_1_0_Symp_rost	0.006	0.019222
1316	Symp_rost_(sub-)adult_of_NB_taxa	Symp_rost	(sub-)adult_of_NB_taxa	CA_NB	3	4	Corse2	IN	4	0	0	0	Corse2_IN_4_0_Symp_rost	0	0
1317	Symp_rost_(sub-)adult_of_NB_taxa	Symp_rost	(sub-)adult_of_NB_taxa	CA_NB	3	4	Corse2	OUT	1	0	0.002	0.01618	Corse2_OUT_1_0_Symp_rost	0.002	0.01618
1318	Symp_rost_(sub-)adult_of_NB_taxa	Symp_rost	(sub-)adult_of_NB_taxa	CA_NB	3	4	Sardinia	IN	4	0	0	0	Sardinia_IN_4_0_Symp_rost	0	0
1319	Symp_rost_(sub-)adult_of_NB_taxa	Symp_rost	(sub-)adult_of_NB_taxa	CA_NB	3	4	Corse2	OUT	3	0	0	0	Corse2_OUT_3_0_Symp_rost	0	0
1320	Symp_rost_(sub-)adult_of_NB_taxa	Symp_rost	(sub-)adult_of_NB_taxa	CA_NB	3	4	Sardinia	IN	1	0	0	0	Sardinia_IN_1_0_Symp_rost	0	0
1321	Symp_tinc_(sub-)adult_of_NB_taxa	Symp_tinc	(sub-)adult_of_NB_taxa	CA_NB	3	4	Sardinia	OUT	3	0	0.016	1.28931	Sardinia_OUT_3_0_Symp_tinc	0.016	1.28931
1322	Symp_tinc_(sub-)adult_of_NB_taxa	Symp_tinc	(sub-)adult_of_NB_taxa	CA_NB	3	4	Spain	IN	1	0	0.01	0.514569	Spain_IN_1_0_Symp_tinc	0.01	0.514569
1323	Symp_tinc_(sub-)adult_of_NB_taxa	Symp_tinc	(sub-)adult_of_NB_taxa	CA_NB	3	4	Spain	IN	4	0	0.002	0.0512982	Spain_IN_4_0_Symp_tinc	0.002	0.0512982
1324	Symp_tinc_(sub-)adult_of_NB_taxa	Symp_tinc	(sub-)adult_of_NB_taxa	CA_NB	3	4	Corse2	OUT	1	0	0.05	5.5239	Corse2_OUT_1_0_Symp_tinc	0.05	5.5239
1325	Symp_tinc_(sub-)adult_of_NB_taxa	Symp_tinc	(sub-)adult_of_NB_taxa	CA_NB	3	4	Corse2	OUT	3	0	0.026	1.93198	Corse2_OUT_3_0_Symp_tinc	0.026	1.93198
1326	Symp_tinc_(sub-)adult_of_NB_taxa	Symp_tinc	(sub-)adult_of_NB_taxa	CA_NB	3	4	Sardinia	IN	3	0	0.006	0.976954	Sardinia_IN_3_0_Symp_tinc	0.006	0.976954
1327	Symp_tinc_(sub-)adult_of_NB_taxa	Symp_tinc	(sub-)adult_of_NB_taxa	CA_NB	3	4	Sardinia	IN	4	0	0.036	3.58371	Sardinia_IN_4_0_Symp_tinc	0.036	3.58371
1328	Symp_tinc_(sub-)adult_of_NB_taxa	Symp_tinc	(sub-)adult_of_NB_taxa	CA_NB	3	4	Spain	OUT	1	0	0.02	2.12621	Spain_OUT_1_0_Symp_tinc	0.02	2.12621
1329	Symp_tinc_(sub-)adult_of_NB_taxa	Symp_tinc	(sub-)adult_of_NB_taxa	CA_NB	3	4	Corse2	OUT	4	0	0.052	1.59295	Corse2_OUT_4_0_Symp_tinc	0.052	1.59295
1330	Symp_tinc_(sub-)adult_of_NB_taxa	Symp_tinc	(sub-)adult_of_NB_taxa	CA_NB	3	4	Spain	IN	3	0	0	0	Spain_IN_3_0_Symp_tinc	0	0
1331	Symp_tinc_(sub-)adult_of_NB_taxa	Symp_tinc	(sub-)adult_of_NB_taxa	CA_NB	3	4	Sardinia	OUT	2	0	0.072	3.73759	Sardinia_OUT_2_0_Symp_tinc	0.072	3.73759
1332	Symp_tinc_(sub-)adult_of_NB_taxa	Symp_tinc	(sub-)adult_of_NB_taxa	CA_NB	3	4	Spain	OUT	4	0	0.028	3.94477	Spain_OUT_4_0_Symp_tinc	0.028	3.94477
1333	Symp_tinc_(sub-)adult_of_NB_taxa	Symp_tinc	(sub-)adult_of_NB_taxa	CA_NB	3	4	Corse2	IN	4	0	0.044	3.8616	Corse2_IN_4_0_Symp_tinc	0.044	3.8616
1334	Symp_tinc_(sub-)adult_of_NB_taxa	Symp_tinc	(sub-)adult_of_NB_taxa	CA_NB	3	4	Sardinia	OUT	4	0	0.062	4.2197	Sardinia_OUT_4_0_Symp_tinc	0.062	4.2197
1335	Symp_tinc_(sub-)adult_of_NB_taxa	Symp_tinc	(sub-)adult_of_NB_taxa	CA_NB	3	4	Sardinia	IN	2	0	0.062	4.14134	Sardinia_IN_2_0_Symp_tinc	0.062	4.14134
1336	Symp_tinc_(sub-)adult_of_NB_taxa	Symp_tinc	(sub-)adult_of_NB_taxa	CA_NB	3	4	Sardinia	IN	1	0	0.018	3.29517	Sardinia_IN_1_0_Symp_tinc	0.018	3.29517
1337	Symp_tinc_(sub-)adult_of_NB_taxa	Symp_tinc	(sub-)adult_of_NB_taxa	CA_NB	3	4	Corse2	IN	1	0	0.042	5.63748	Corse2_IN_1_0_Symp_tinc	0.042	5.63748
1338	Symp_tinc_(sub-)adult_of_NB_taxa	Symp_tinc	(sub-)adult_of_NB_taxa	CA_NB	3	4	Sardinia	OUT	1	0	0.052	3.03411	Sardinia_OUT_1_0_Symp_tinc	0.052	3.03411
1339	Symp_tinc_(sub-)adult_of_NB_taxa	Symp_tinc	(sub-)adult_of_NB_taxa	CA_NB	3	4	Spain	OUT	3	0	0.024	2.69153	Spain_OUT_3_0_Symp_tinc	0.024	2.69153
1340	Symp_tinc_(sub-)adult_of_NB_taxa	Symp_tinc	(sub-)adult_of_NB_taxa	CA_NB	3	4	Corse2	IN	2	0	0.016	0.979232	Corse2_IN_2_0_Symp_tinc	0.016	0.979232
1341	Symp_tinc_(sub-)adult_of_NB_taxa	Symp_tinc	(sub-)adult_of_NB_taxa	CA_NB	3	4	Corse2	OUT	2	0	0.026	2.16584	Corse2_OUT_2_0_Symp_tinc	0.026	2.16584
1342	Symp_tinc_(sub-)adult_of_NB_taxa	Symp_tinc	(sub-)adult_of_NB_taxa	CA_NB	3	4	Corse2	IN	3	0	0.026	2.66486	Corse2_IN_3_0_Symp_tinc	0.026	2.66486
1343	Symp_tinc_(sub-)adult_of_NB_taxa	Symp_tinc	(sub-)adult_of_NB_taxa	CA_NB	3	4	Spain	OUT	2	0	0.018	2.34273	Spain_OUT_2_0_Symp_tinc	0.018	2.34273
1344	Symp_tinc_(sub-)adult_of_NB_taxa	Symp_tinc	(sub-)adult_of_NB_taxa	CA_NB	3	4	Spain	IN	2	0	0.012	1.53182	Spain_IN_2_0_Symp_tinc	0.012	1.53182
1345	Symp_tinc_CB_juvenile_of_NB_taxa	Symp_tinc	CB_juvenile_of_NB_taxa	CA_CB	2	3	Spain	OUT	3	1	0	0	Spain_OUT_3_1_Symp_tinc	0	0
1346	Symp_tinc_CB_juvenile_of_NB_taxa	Symp_tinc	CB_juvenile_of_NB_taxa	CA_CB	2	3	Corse2	IN	2	1	0	0	Corse2_IN_2_1_Symp_tinc	0	0
1347	Symp_tinc_CB_juvenile_of_NB_taxa	Symp_tinc	CB_juvenile_of_NB_taxa	CA_CB	2	3	Spain	OUT	1	1	0	0	Spain_OUT_1_1_Symp_tinc	0	0
1348	Symp_tinc_CB_juvenile_of_NB_taxa	Symp_tinc	CB_juvenile_of_NB_taxa	CA_CB	2	3	Corse2	IN	1	1	0	0	Corse2_IN_1_1_Symp_tinc	0	0
1349	Symp_tinc_CB_juvenile_of_NB_taxa	Symp_tinc	CB_juvenile_of_NB_taxa	CA_CB	2	3	Spain	IN	1	1	0	0	Spain_IN_1_1_Symp_tinc	0	0
1350	Symp_tinc_CB_juvenile_of_NB_taxa	Symp_tinc	CB_juvenile_of_NB_taxa	CA_CB	2	3	Spain	OUT	4	1	0	0	Spain_OUT_4_1_Symp_tinc	0	0
1351	Symp_tinc_CB_juvenile_of_NB_taxa	Symp_tinc	CB_juvenile_of_NB_taxa	CA_CB	2	3	Spain	OUT	2	1	0	0	Spain_OUT_2_1_Symp_tinc	0	0
1352	Symp_tinc_CB_juvenile_of_NB_taxa	Symp_tinc	CB_juvenile_of_NB_taxa	CA_CB	2	3	Sardinia	IN	3	1	0	0	Sardinia_IN_3_1_Symp_tinc	0	0
1353	Symp_tinc_CB_juvenile_of_NB_taxa	Symp_tinc	CB_juvenile_of_NB_taxa	CA_CB	2	3	Sardinia	IN	4	1	0	0	Sardinia_IN_4_1_Symp_tinc	0	0
1354	Symp_tinc_CB_juvenile_of_NB_taxa	Symp_tinc	CB_juvenile_of_NB_taxa	CA_CB	2	3	Corse2	OUT	1	1	0.025	0.0270958	Corse2_OUT_1_1_Symp_tinc	0.025	0.0270958
1355	Symp_tinc_CB_juvenile_of_NB_taxa	Symp_tinc	CB_juvenile_of_NB_taxa	CA_CB	2	3	Sardinia	OUT	3	1	0	0	Sardinia_OUT_3_1_Symp_tinc	0	0
1356	Symp_tinc_CB_juvenile_of_NB_taxa	Symp_tinc	CB_juvenile_of_NB_taxa	CA_CB	2	3	Corse2	OUT	2	1	0	0	Corse2_OUT_2_1_Symp_tinc	0	0
1357	Symp_tinc_CB_juvenile_of_NB_taxa	Symp_tinc	CB_juvenile_of_NB_taxa	CA_CB	2	3	Corse2	OUT	3	1	0	0	Corse2_OUT_3_1_Symp_tinc	0	0
1358	Symp_tinc_CB_juvenile_of_NB_taxa	Symp_tinc	CB_juvenile_of_NB_taxa	CA_CB	2	3	Sardinia	OUT	1	1	0	0	Sardinia_OUT_1_1_Symp_tinc	0	0
1359	Symp_tinc_CB_juvenile_of_NB_taxa	Symp_tinc	CB_juvenile_of_NB_taxa	CA_CB	2	3	Corse2	OUT	4	1	0	0	Corse2_OUT_4_1_Symp_tinc	0	0
1360	Symp_tinc_CB_juvenile_of_NB_taxa	Symp_tinc	CB_juvenile_of_NB_taxa	CA_CB	2	3	Spain	IN	4	1	0	0	Spain_IN_4_1_Symp_tinc	0	0
1361	Symp_tinc_CB_juvenile_of_NB_taxa	Symp_tinc	CB_juvenile_of_NB_taxa	CA_CB	2	3	Sardinia	OUT	2	1	0.1	0.108383	Sardinia_OUT_2_1_Symp_tinc	0.1	0.108383
1362	Symp_tinc_CB_juvenile_of_NB_taxa	Symp_tinc	CB_juvenile_of_NB_taxa	CA_CB	2	3	Sardinia	IN	2	1	0	0	Sardinia_IN_2_1_Symp_tinc	0	0
1363	Symp_tinc_CB_juvenile_of_NB_taxa	Symp_tinc	CB_juvenile_of_NB_taxa	CA_CB	2	3	Sardinia	OUT	4	1	0	0	Sardinia_OUT_4_1_Symp_tinc	0	0
1364	Symp_tinc_CB_juvenile_of_NB_taxa	Symp_tinc	CB_juvenile_of_NB_taxa	CA_CB	2	3	Corse2	IN	3	1	0.025	0.0270958	Corse2_IN_3_1_Symp_tinc	0.025	0.0270958
1365	Symp_tinc_CB_juvenile_of_NB_taxa	Symp_tinc	CB_juvenile_of_NB_taxa	CA_CB	2	3	Spain	IN	2	1	0	0	Spain_IN_2_1_Symp_tinc	0	0
1366	Symp_tinc_CB_juvenile_of_NB_taxa	Symp_tinc	CB_juvenile_of_NB_taxa	CA_CB	2	3	Sardinia	IN	1	1	0	0	Sardinia_IN_1_1_Symp_tinc	0	0
1367	Symp_tinc_CB_juvenile_of_NB_taxa	Symp_tinc	CB_juvenile_of_NB_taxa	CA_CB	2	3	Spain	IN	3	1	0	0	Spain_IN_3_1_Symp_tinc	0	0
1368	Symp_tinc_CB_juvenile_of_NB_taxa	Symp_tinc	CB_juvenile_of_NB_taxa	CA_CB	2	3	Corse2	IN	4	1	0	0	Corse2_IN_4_1_Symp_tinc	0	0
1369	Thal_pavo_(sub-)adult_of_NB_taxa	Thal_pavo	(sub-)adult_of_NB_taxa	CA_NB	3	4	Spain	OUT	4	0	0.004	0.125242	Spain_OUT_4_0_Thal_pavo	0.004	0.125242
1370	Thal_pavo_(sub-)adult_of_NB_taxa	Thal_pavo	(sub-)adult_of_NB_taxa	CA_NB	3	4	Spain	OUT	1	0	0.03	0.733303	Spain_OUT_1_0_Thal_pavo	0.03	0.733303
1371	Thal_pavo_(sub-)adult_of_NB_taxa	Thal_pavo	(sub-)adult_of_NB_taxa	CA_NB	3	4	Corse2	OUT	3	0	0	0	Corse2_OUT_3_0_Thal_pavo	0	0
1372	Thal_pavo_(sub-)adult_of_NB_taxa	Thal_pavo	(sub-)adult_of_NB_taxa	CA_NB	3	4	Sardinia	OUT	1	0	0	0	Sardinia_OUT_1_0_Thal_pavo	0	0
1373	Thal_pavo_(sub-)adult_of_NB_taxa	Thal_pavo	(sub-)adult_of_NB_taxa	CA_NB	3	4	Sardinia	OUT	3	0	0.01	0.106737	Sardinia_OUT_3_0_Thal_pavo	0.01	0.106737
1374	Thal_pavo_(sub-)adult_of_NB_taxa	Thal_pavo	(sub-)adult_of_NB_taxa	CA_NB	3	4	Corse2	OUT	1	0	0.004	0.0448807	Corse2_OUT_1_0_Thal_pavo	0.004	0.0448807
1375	Thal_pavo_(sub-)adult_of_NB_taxa	Thal_pavo	(sub-)adult_of_NB_taxa	CA_NB	3	4	Corse2	IN	3	0	0	0	Corse2_IN_3_0_Thal_pavo	0	0
1376	Thal_pavo_(sub-)adult_of_NB_taxa	Thal_pavo	(sub-)adult_of_NB_taxa	CA_NB	3	4	Sardinia	IN	1	0	0.092	1.18869	Sardinia_IN_1_0_Thal_pavo	0.092	1.18869
1377	Thal_pavo_(sub-)adult_of_NB_taxa	Thal_pavo	(sub-)adult_of_NB_taxa	CA_NB	3	4	Spain	OUT	3	0	0.012	0.419755	Spain_OUT_3_0_Thal_pavo	0.012	0.419755
1378	Thal_pavo_(sub-)adult_of_NB_taxa	Thal_pavo	(sub-)adult_of_NB_taxa	CA_NB	3	4	Sardinia	IN	2	0	0.162	2.81729	Sardinia_IN_2_0_Thal_pavo	0.162	2.81729
1379	Thal_pavo_(sub-)adult_of_NB_taxa	Thal_pavo	(sub-)adult_of_NB_taxa	CA_NB	3	4	Corse2	OUT	4	0	0	0	Corse2_OUT_4_0_Thal_pavo	0	0
1380	Thal_pavo_(sub-)adult_of_NB_taxa	Thal_pavo	(sub-)adult_of_NB_taxa	CA_NB	3	4	Spain	IN	1	0	0.038	0.461083	Spain_IN_1_0_Thal_pavo	0.038	0.461083
1381	Thal_pavo_(sub-)adult_of_NB_taxa	Thal_pavo	(sub-)adult_of_NB_taxa	CA_NB	3	4	Sardinia	OUT	4	0	0.042	0.463279	Sardinia_OUT_4_0_Thal_pavo	0.042	0.463279
1382	Thal_pavo_(sub-)adult_of_NB_taxa	Thal_pavo	(sub-)adult_of_NB_taxa	CA_NB	3	4	Sardinia	IN	4	0	0.07	1.01201	Sardinia_IN_4_0_Thal_pavo	0.07	1.01201
1383	Thal_pavo_(sub-)adult_of_NB_taxa	Thal_pavo	(sub-)adult_of_NB_taxa	CA_NB	3	4	Corse2	IN	1	0	0.065	0.713288	Corse2_IN_1_0_Thal_pavo	0.065	0.713288
1384	Thal_pavo_(sub-)adult_of_NB_taxa	Thal_pavo	(sub-)adult_of_NB_taxa	CA_NB	3	4	Sardinia	OUT	2	0	0.008	0.352157	Sardinia_OUT_2_0_Thal_pavo	0.008	0.352157
1385	Thal_pavo_(sub-)adult_of_NB_taxa	Thal_pavo	(sub-)adult_of_NB_taxa	CA_NB	3	4	Corse2	IN	2	0	0.012	0.375726	Corse2_IN_2_0_Thal_pavo	0.012	0.375726
1386	Thal_pavo_(sub-)adult_of_NB_taxa	Thal_pavo	(sub-)adult_of_NB_taxa	CA_NB	3	4	Corse2	OUT	2	0	0	0	Corse2_OUT_2_0_Thal_pavo	0	0
1387	Thal_pavo_(sub-)adult_of_NB_taxa	Thal_pavo	(sub-)adult_of_NB_taxa	CA_NB	3	4	Spain	IN	4	0	0.05	0.850985	Spain_IN_4_0_Thal_pavo	0.05	0.850985
1388	Thal_pavo_(sub-)adult_of_NB_taxa	Thal_pavo	(sub-)adult_of_NB_taxa	CA_NB	3	4	Sardinia	IN	3	0	0.114	2.10469	Sardinia_IN_3_0_Thal_pavo	0.114	2.10469
1389	Thal_pavo_(sub-)adult_of_NB_taxa	Thal_pavo	(sub-)adult_of_NB_taxa	CA_NB	3	4	Spain	IN	2	0	0.048	0.583327	Spain_IN_2_0_Thal_pavo	0.048	0.583327
1390	Thal_pavo_(sub-)adult_of_NB_taxa	Thal_pavo	(sub-)adult_of_NB_taxa	CA_NB	3	4	Spain	IN	3	0	0.385	3.5621	Spain_IN_3_0_Thal_pavo	0.385	3.5621
1391	Thal_pavo_(sub-)adult_of_NB_taxa	Thal_pavo	(sub-)adult_of_NB_taxa	CA_NB	3	4	Corse2	IN	4	0	0	0	Corse2_IN_4_0_Thal_pavo	0	0
1392	Thal_pavo_(sub-)adult_of_NB_taxa	Thal_pavo	(sub-)adult_of_NB_taxa	CA_NB	3	4	Spain	OUT	2	0	0.036	0.394477	Spain_OUT_2_0_Thal_pavo	0.036	0.394477
1393	Thal_pavo_CB_juvenile_of_NB_taxa	Thal_pavo	CB_juvenile_of_NB_taxa	CA_CB	2	3	Sardinia	OUT	3	1	0	0	Sardinia_OUT_3_1_Thal_pavo	0	0
1394	Thal_pavo_CB_juvenile_of_NB_taxa	Thal_pavo	CB_juvenile_of_NB_taxa	CA_CB	2	3	Corse2	IN	1	1	0	0	Corse2_IN_1_1_Thal_pavo	0	0
1395	Thal_pavo_CB_juvenile_of_NB_taxa	Thal_pavo	CB_juvenile_of_NB_taxa	CA_CB	2	3	Spain	OUT	4	1	0.05	0.0142623	Spain_OUT_4_1_Thal_pavo	0.05	0.0142623
1396	Thal_pavo_CB_juvenile_of_NB_taxa	Thal_pavo	CB_juvenile_of_NB_taxa	CA_CB	2	3	Corse2	OUT	2	1	0	0	Corse2_OUT_2_1_Thal_pavo	0	0
1397	Thal_pavo_CB_juvenile_of_NB_taxa	Thal_pavo	CB_juvenile_of_NB_taxa	CA_CB	2	3	Spain	IN	4	1	1.025	0.0495083	Spain_IN_4_1_Thal_pavo	1.025	0.0495083
1398	Thal_pavo_CB_juvenile_of_NB_taxa	Thal_pavo	CB_juvenile_of_NB_taxa	CA_CB	2	3	Sardinia	IN	3	1	0	0	Sardinia_IN_3_1_Thal_pavo	0	0
1399	Thal_pavo_CB_juvenile_of_NB_taxa	Thal_pavo	CB_juvenile_of_NB_taxa	CA_CB	2	3	Spain	OUT	3	1	0	0	Spain_OUT_3_1_Thal_pavo	0	0
1400	Thal_pavo_CB_juvenile_of_NB_taxa	Thal_pavo	CB_juvenile_of_NB_taxa	CA_CB	2	3	Sardinia	OUT	2	1	0	0	Sardinia_OUT_2_1_Thal_pavo	0	0
1401	Thal_pavo_CB_juvenile_of_NB_taxa	Thal_pavo	CB_juvenile_of_NB_taxa	CA_CB	2	3	Sardinia	OUT	4	1	0.125	0.169343	Sardinia_OUT_4_1_Thal_pavo	0.125	0.169343
1402	Thal_pavo_CB_juvenile_of_NB_taxa	Thal_pavo	CB_juvenile_of_NB_taxa	CA_CB	2	3	Sardinia	IN	2	1	0	0	Sardinia_IN_2_1_Thal_pavo	0	0
1403	Thal_pavo_CB_juvenile_of_NB_taxa	Thal_pavo	CB_juvenile_of_NB_taxa	CA_CB	2	3	Spain	OUT	2	1	0.025	0.0171484	Spain_OUT_2_1_Thal_pavo	0.025	0.0171484
1404	Thal_pavo_CB_juvenile_of_NB_taxa	Thal_pavo	CB_juvenile_of_NB_taxa	CA_CB	2	3	Sardinia	IN	4	1	0	0	Sardinia_IN_4_1_Thal_pavo	0	0
1405	Thal_pavo_CB_juvenile_of_NB_taxa	Thal_pavo	CB_juvenile_of_NB_taxa	CA_CB	2	3	Spain	IN	2	1	0.35	0.0245444	Spain_IN_2_1_Thal_pavo	0.35	0.0245444
1406	Thal_pavo_CB_juvenile_of_NB_taxa	Thal_pavo	CB_juvenile_of_NB_taxa	CA_CB	2	3	Spain	OUT	1	1	0.075	0.0163328	Spain_OUT_1_1_Thal_pavo	0.075	0.0163328
1407	Thal_pavo_CB_juvenile_of_NB_taxa	Thal_pavo	CB_juvenile_of_NB_taxa	CA_CB	2	3	Sardinia	OUT	1	1	0	0	Sardinia_OUT_1_1_Thal_pavo	0	0
1408	Thal_pavo_CB_juvenile_of_NB_taxa	Thal_pavo	CB_juvenile_of_NB_taxa	CA_CB	2	3	Spain	IN	1	1	0.05	0.00232053	Spain_IN_1_1_Thal_pavo	0.05	0.00232053
1409	Thal_pavo_CB_juvenile_of_NB_taxa	Thal_pavo	CB_juvenile_of_NB_taxa	CA_CB	2	3	Corse2	OUT	4	1	0	0	Corse2_OUT_4_1_Thal_pavo	0	0
1410	Thal_pavo_CB_juvenile_of_NB_taxa	Thal_pavo	CB_juvenile_of_NB_taxa	CA_CB	2	3	Corse2	OUT	1	1	0	0	Corse2_OUT_1_1_Thal_pavo	0	0
1411	Thal_pavo_CB_juvenile_of_NB_taxa	Thal_pavo	CB_juvenile_of_NB_taxa	CA_CB	2	3	Sardinia	IN	1	1	0	0	Sardinia_IN_1_1_Thal_pavo	0	0
1412	Thal_pavo_CB_juvenile_of_NB_taxa	Thal_pavo	CB_juvenile_of_NB_taxa	CA_CB	2	3	Corse2	OUT	3	1	0	0	Corse2_OUT_3_1_Thal_pavo	0	0
1413	Thal_pavo_CB_juvenile_of_NB_taxa	Thal_pavo	CB_juvenile_of_NB_taxa	CA_CB	2	3	Spain	IN	3	1	0.6	0.389648	Spain_IN_3_1_Thal_pavo	0.6	0.389648
1414	Thal_pavo_CB_juvenile_of_NB_taxa	Thal_pavo	CB_juvenile_of_NB_taxa	CA_CB	2	3	Corse2	IN	4	1	0	0	Corse2_IN_4_1_Thal_pavo	0	0
1415	Thal_pavo_CB_juvenile_of_NB_taxa	Thal_pavo	CB_juvenile_of_NB_taxa	CA_CB	2	3	Corse2	IN	3	1	0	0	Corse2_IN_3_1_Thal_pavo	0	0
1416	Thal_pavo_CB_juvenile_of_NB_taxa	Thal_pavo	CB_juvenile_of_NB_taxa	CA_CB	2	3	Corse2	IN	2	1	0	0	Corse2_IN_2_1_Thal_pavo	0	0
1417	Trip_dela_CB_taxa	Trip_dela	CB_taxa	CA_CB	1	3	Corse2	IN	2	1	0.05	0.0475951	Corse2_IN_2_1_Trip_dela	0.05	0.0475951
1418	Trip_dela_CB_taxa	Trip_dela	CB_taxa	CA_CB	1	3	Corse2	OUT	4	1	0.075	0.046363	Corse2_OUT_4_1_Trip_dela	0.075	0.046363
1419	Trip_dela_CB_taxa	Trip_dela	CB_taxa	CA_CB	1	3	Corse2	IN	1	1	0	0	Corse2_IN_1_1_Trip_dela	0	0
1420	Trip_dela_CB_taxa	Trip_dela	CB_taxa	CA_CB	1	3	Spain	OUT	3	1	0.025	0.0815396	Spain_OUT_3_1_Trip_dela	0.025	0.0815396
1421	Trip_dela_CB_taxa	Trip_dela	CB_taxa	CA_CB	1	3	Spain	IN	4	1	0.175	0.345885	Spain_IN_4_1_Trip_dela	0.175	0.345885
1422	Trip_dela_CB_taxa	Trip_dela	CB_taxa	CA_CB	1	3	Sardinia	OUT	4	1	0	0	Sardinia_OUT_4_1_Trip_dela	0	0
1423	Trip_dela_CB_taxa	Trip_dela	CB_taxa	CA_CB	1	3	Spain	IN	3	1	0.2	0.255177	Spain_IN_3_1_Trip_dela	0.2	0.255177
1424	Trip_dela_CB_taxa	Trip_dela	CB_taxa	CA_CB	1	3	Spain	OUT	2	1	0	0	Spain_OUT_2_1_Trip_dela	0	0
1425	Trip_dela_CB_taxa	Trip_dela	CB_taxa	CA_CB	1	3	Spain	IN	2	1	0.05	0.0904989	Spain_IN_2_1_Trip_dela	0.05	0.0904989
1426	Trip_dela_CB_taxa	Trip_dela	CB_taxa	CA_CB	1	3	Spain	IN	1	1	0.2	0.387557	Spain_IN_1_1_Trip_dela	0.2	0.387557
1427	Trip_dela_CB_taxa	Trip_dela	CB_taxa	CA_CB	1	3	Corse2	OUT	2	1	0.025	0.00869044	Corse2_OUT_2_1_Trip_dela	0.025	0.00869044
1428	Trip_dela_CB_taxa	Trip_dela	CB_taxa	CA_CB	1	3	Sardinia	OUT	2	1	0.05	0.0904989	Sardinia_OUT_2_1_Trip_dela	0.05	0.0904989
1429	Trip_dela_CB_taxa	Trip_dela	CB_taxa	CA_CB	1	3	Sardinia	OUT	1	1	0.1	0.207097	Sardinia_OUT_1_1_Trip_dela	0.1	0.207097
1430	Trip_dela_CB_taxa	Trip_dela	CB_taxa	CA_CB	1	3	Sardinia	OUT	3	1	0	0	Sardinia_OUT_3_1_Trip_dela	0	0
1431	Trip_dela_CB_taxa	Trip_dela	CB_taxa	CA_CB	1	3	Sardinia	IN	3	1	0.05	0.163079	Sardinia_IN_3_1_Trip_dela	0.05	0.163079
1432	Trip_dela_CB_taxa	Trip_dela	CB_taxa	CA_CB	1	3	Corse2	IN	3	1	0.15	0.310645	Corse2_IN_3_1_Trip_dela	0.15	0.310645
1433	Trip_dela_CB_taxa	Trip_dela	CB_taxa	CA_CB	1	3	Spain	OUT	4	1	0.05	0.00469134	Spain_OUT_4_1_Trip_dela	0.05	0.00469134
1434	Trip_dela_CB_taxa	Trip_dela	CB_taxa	CA_CB	1	3	Corse2	OUT	1	1	0	0	Corse2_OUT_1_1_Trip_dela	0	0
1435	Trip_dela_CB_taxa	Trip_dela	CB_taxa	CA_CB	1	3	Sardinia	IN	4	1	0.45	0.660383	Sardinia_IN_4_1_Trip_dela	0.45	0.660383
1436	Trip_dela_CB_taxa	Trip_dela	CB_taxa	CA_CB	1	3	Sardinia	IN	2	1	0.45	0.324573	Sardinia_IN_2_1_Trip_dela	0.45	0.324573
1437	Trip_dela_CB_taxa	Trip_dela	CB_taxa	CA_CB	1	3	Sardinia	IN	1	1	0.3	0.205297	Sardinia_IN_1_1_Trip_dela	0.3	0.205297
1438	Trip_dela_CB_taxa	Trip_dela	CB_taxa	CA_CB	1	3	Spain	OUT	1	1	0	0	Spain_OUT_1_1_Trip_dela	0	0
1439	Trip_dela_CB_taxa	Trip_dela	CB_taxa	CA_CB	1	3	Corse2	IN	4	1	0.125	0.0180731	Corse2_IN_4_1_Trip_dela	0.125	0.0180731
1440	Trip_dela_CB_taxa	Trip_dela	CB_taxa	CA_CB	1	3	Corse2	OUT	3	1	0.05	0.0173809	Corse2_OUT_3_1_Trip_dela	0.05	0.0173809
1441	Trip_inde_CB_taxa	Trip_inde	CB_taxa	CA_CB	1	3	Sardinia	OUT	3	1	0	0	Sardinia_OUT_3_1_Trip_inde	0	0
1442	Trip_inde_CB_taxa	Trip_inde	CB_taxa	CA_CB	1	3	Spain	IN	1	1	0	0	Spain_IN_1_1_Trip_inde	0	0
1443	Trip_inde_CB_taxa	Trip_inde	CB_taxa	CA_CB	1	3	Corse2	IN	2	1	0	0	Corse2_IN_2_1_Trip_inde	0	0
1444	Trip_inde_CB_taxa	Trip_inde	CB_taxa	CA_CB	1	3	Sardinia	IN	2	1	0.075	0.0197265	Sardinia_IN_2_1_Trip_inde	0.075	0.0197265
1445	Trip_inde_CB_taxa	Trip_inde	CB_taxa	CA_CB	1	3	Spain	IN	2	1	0.075	0.0197265	Spain_IN_2_1_Trip_inde	0.075	0.0197265
1446	Trip_inde_CB_taxa	Trip_inde	CB_taxa	CA_CB	1	3	Corse2	IN	1	1	0	0	Corse2_IN_1_1_Trip_inde	0	0
1447	Trip_inde_CB_taxa	Trip_inde	CB_taxa	CA_CB	1	3	Sardinia	IN	3	1	0	0	Sardinia_IN_3_1_Trip_inde	0	0
1448	Trip_inde_CB_taxa	Trip_inde	CB_taxa	CA_CB	1	3	Sardinia	OUT	4	1	0	0	Sardinia_OUT_4_1_Trip_inde	0	0
1449	Trip_inde_CB_taxa	Trip_inde	CB_taxa	CA_CB	1	3	Corse2	OUT	1	1	0	0	Corse2_OUT_1_1_Trip_inde	0	0
1450	Trip_inde_CB_taxa	Trip_inde	CB_taxa	CA_CB	1	3	Spain	OUT	1	1	0	0	Spain_OUT_1_1_Trip_inde	0	0
1451	Trip_inde_CB_taxa	Trip_inde	CB_taxa	CA_CB	1	3	Sardinia	IN	4	1	0	0	Sardinia_IN_4_1_Trip_inde	0	0
1452	Trip_inde_CB_taxa	Trip_inde	CB_taxa	CA_CB	1	3	Corse2	OUT	4	1	0	0	Corse2_OUT_4_1_Trip_inde	0	0
1453	Trip_inde_CB_taxa	Trip_inde	CB_taxa	CA_CB	1	3	Corse2	IN	4	1	0	0	Corse2_IN_4_1_Trip_inde	0	0
1454	Trip_inde_CB_taxa	Trip_inde	CB_taxa	CA_CB	1	3	Spain	IN	4	1	0	0	Spain_IN_4_1_Trip_inde	0	0
1455	Trip_inde_CB_taxa	Trip_inde	CB_taxa	CA_CB	1	3	Sardinia	OUT	2	1	0	0	Sardinia_OUT_2_1_Trip_inde	0	0
1456	Trip_inde_CB_taxa	Trip_inde	CB_taxa	CA_CB	1	3	Spain	OUT	4	1	0	0	Spain_OUT_4_1_Trip_inde	0	0
1457	Trip_inde_CB_taxa	Trip_inde	CB_taxa	CA_CB	1	3	Spain	OUT	2	1	0	0	Spain_OUT_2_1_Trip_inde	0	0
1458	Trip_inde_CB_taxa	Trip_inde	CB_taxa	CA_CB	1	3	Sardinia	OUT	1	1	0	0	Sardinia_OUT_1_1_Trip_inde	0	0
1459	Trip_inde_CB_taxa	Trip_inde	CB_taxa	CA_CB	1	3	Corse2	OUT	3	1	0	0	Corse2_OUT_3_1_Trip_inde	0	0
1460	Trip_inde_CB_taxa	Trip_inde	CB_taxa	CA_CB	1	3	Spain	OUT	3	1	0	0	Spain_OUT_3_1_Trip_inde	0	0
1461	Trip_inde_CB_taxa	Trip_inde	CB_taxa	CA_CB	1	3	Spain	IN	3	1	0	0	Spain_IN_3_1_Trip_inde	0	0
1462	Trip_inde_CB_taxa	Trip_inde	CB_taxa	CA_CB	1	3	Corse2	OUT	2	1	0	0	Corse2_OUT_2_1_Trip_inde	0	0
1463	Trip_inde_CB_taxa	Trip_inde	CB_taxa	CA_CB	1	3	Corse2	IN	3	1	0	0	Corse2_IN_3_1_Trip_inde	0	0
1464	Trip_inde_CB_taxa	Trip_inde	CB_taxa	CA_CB	1	3	Sardinia	IN	1	1	0.025	0.00234567	Sardinia_IN_1_1_Trip_inde	0.025	0.00234567
1465	Trip_trip_CB_taxa	Trip_trip	CB_taxa	CA_CB	1	3	Spain	IN	3	1	0	0	Spain_IN_3_1_Trip_trip	0	0
1466	Trip_trip_CB_taxa	Trip_trip	CB_taxa	CA_CB	1	3	Corse2	IN	3	1	0.05	0.413001	Corse2_IN_3_1_Trip_trip	0.05	0.413001
1467	Trip_trip_CB_taxa	Trip_trip	CB_taxa	CA_CB	1	3	Spain	OUT	3	1	0	0	Spain_OUT_3_1_Trip_trip	0	0
1468	Trip_trip_CB_taxa	Trip_trip	CB_taxa	CA_CB	1	3	Spain	OUT	1	1	0	0	Spain_OUT_1_1_Trip_trip	0	0
1469	Trip_trip_CB_taxa	Trip_trip	CB_taxa	CA_CB	1	3	Spain	IN	2	1	0	0	Spain_IN_2_1_Trip_trip	0	0
1470	Trip_trip_CB_taxa	Trip_trip	CB_taxa	CA_CB	1	3	Corse2	OUT	4	1	0	0	Corse2_OUT_4_1_Trip_trip	0	0
1471	Trip_trip_CB_taxa	Trip_trip	CB_taxa	CA_CB	1	3	Spain	OUT	2	1	0	0	Spain_OUT_2_1_Trip_trip	0	0
1472	Trip_trip_CB_taxa	Trip_trip	CB_taxa	CA_CB	1	3	Sardinia	IN	3	1	0	0	Sardinia_IN_3_1_Trip_trip	0	0
1473	Trip_trip_CB_taxa	Trip_trip	CB_taxa	CA_CB	1	3	Sardinia	OUT	3	1	0	0	Sardinia_OUT_3_1_Trip_trip	0	0
1474	Trip_trip_CB_taxa	Trip_trip	CB_taxa	CA_CB	1	3	Corse2	IN	4	1	0.1	0.826001	Corse2_IN_4_1_Trip_trip	0.1	0.826001
1475	Trip_trip_CB_taxa	Trip_trip	CB_taxa	CA_CB	1	3	Sardinia	OUT	2	1	0	0	Sardinia_OUT_2_1_Trip_trip	0	0
1476	Trip_trip_CB_taxa	Trip_trip	CB_taxa	CA_CB	1	3	Spain	IN	4	1	0	0	Spain_IN_4_1_Trip_trip	0	0
1477	Trip_trip_CB_taxa	Trip_trip	CB_taxa	CA_CB	1	3	Spain	IN	1	1	0	0	Spain_IN_1_1_Trip_trip	0	0
1478	Trip_trip_CB_taxa	Trip_trip	CB_taxa	CA_CB	1	3	Sardinia	IN	1	1	0	0	Sardinia_IN_1_1_Trip_trip	0	0
1479	Trip_trip_CB_taxa	Trip_trip	CB_taxa	CA_CB	1	3	Corse2	OUT	2	1	0	0	Corse2_OUT_2_1_Trip_trip	0	0
1480	Trip_trip_CB_taxa	Trip_trip	CB_taxa	CA_CB	1	3	Corse2	OUT	1	1	0	0	Corse2_OUT_1_1_Trip_trip	0	0
1481	Trip_trip_CB_taxa	Trip_trip	CB_taxa	CA_CB	1	3	Spain	OUT	4	1	0	0	Spain_OUT_4_1_Trip_trip	0	0
1482	Trip_trip_CB_taxa	Trip_trip	CB_taxa	CA_CB	1	3	Corse2	IN	1	1	0	0	Corse2_IN_1_1_Trip_trip	0	0
1483	Trip_trip_CB_taxa	Trip_trip	CB_taxa	CA_CB	1	3	Corse2	OUT	3	1	0.05	0.413001	Corse2_OUT_3_1_Trip_trip	0.05	0.413001
1484	Trip_trip_CB_taxa	Trip_trip	CB_taxa	CA_CB	1	3	Sardinia	OUT	4	1	0	0	Sardinia_OUT_4_1_Trip_trip	0	0
1485	Trip_trip_CB_taxa	Trip_trip	CB_taxa	CA_CB	1	3	Corse2	IN	2	1	0	0	Corse2_IN_2_1_Trip_trip	0	0
1486	Trip_trip_CB_taxa	Trip_trip	CB_taxa	CA_CB	1	3	Sardinia	OUT	1	1	0	0	Sardinia_OUT_1_1_Trip_trip	0	0
1487	Trip_trip_CB_taxa	Trip_trip	CB_taxa	CA_CB	1	3	Sardinia	IN	4	1	0	0	Sardinia_IN_4_1_Trip_trip	0	0
1488	Trip_trip_CB_taxa	Trip_trip	CB_taxa	CA_CB	1	3	Sardinia	IN	2	1	0	0	Sardinia_IN_2_1_Trip_trip	0	0
1489	zJuve_inde	Juve_inde	CB_juvenile_of_NB_taxa	CA_CB	2	3	Sardinia	OUT	4	1	0	0	Sardinia_OUT_4_1_Juve_inde	0	0
1490	zJuve_inde	Juve_inde	CB_juvenile_of_NB_taxa	CA_CB	2	3	Sardinia	IN	1	1	0	0	Sardinia_IN_1_1_Juve_inde	0	0
1491	zJuve_inde	Juve_inde	CB_juvenile_of_NB_taxa	CA_CB	2	3	Spain	IN	1	1	0	0	Spain_IN_1_1_Juve_inde	0	0
1492	zJuve_inde	Juve_inde	CB_juvenile_of_NB_taxa	CA_CB	2	3	Sardinia	IN	2	1	0	0	Sardinia_IN_2_1_Juve_inde	0	0
1493	zJuve_inde	Juve_inde	CB_juvenile_of_NB_taxa	CA_CB	2	3	Corse2	IN	2	1	1.3	0.351	Corse2_IN_2_1_Juve_inde	1.3	0.351
1494	zJuve_inde	Juve_inde	CB_juvenile_of_NB_taxa	CA_CB	2	3	Spain	IN	2	1	0	0	Spain_IN_2_1_Juve_inde	0	0
1495	zJuve_inde	Juve_inde	CB_juvenile_of_NB_taxa	CA_CB	2	3	Corse2	IN	4	1	0	0	Corse2_IN_4_1_Juve_inde	0	0
1496	zJuve_inde	Juve_inde	CB_juvenile_of_NB_taxa	CA_CB	2	3	Spain	IN	3	1	0.05	0.0135	Spain_IN_3_1_Juve_inde	0.05	0.0135
1497	zJuve_inde	Juve_inde	CB_juvenile_of_NB_taxa	CA_CB	2	3	Spain	OUT	3	1	0	0	Spain_OUT_3_1_Juve_inde	0	0
1498	zJuve_inde	Juve_inde	CB_juvenile_of_NB_taxa	CA_CB	2	3	Corse2	OUT	4	1	0	0	Corse2_OUT_4_1_Juve_inde	0	0
1499	zJuve_inde	Juve_inde	CB_juvenile_of_NB_taxa	CA_CB	2	3	Corse2	IN	1	1	3.925	1.05975	Corse2_IN_1_1_Juve_inde	3.925	1.05975
1500	zJuve_inde	Juve_inde	CB_juvenile_of_NB_taxa	CA_CB	2	3	Spain	OUT	1	1	0	0	Spain_OUT_1_1_Juve_inde	0	0
1501	zJuve_inde	Juve_inde	CB_juvenile_of_NB_taxa	CA_CB	2	3	Spain	OUT	4	1	0	0	Spain_OUT_4_1_Juve_inde	0	0
1502	zJuve_inde	Juve_inde	CB_juvenile_of_NB_taxa	CA_CB	2	3	Sardinia	IN	3	1	0	0	Sardinia_IN_3_1_Juve_inde	0	0
1503	zJuve_inde	Juve_inde	CB_juvenile_of_NB_taxa	CA_CB	2	3	Corse2	OUT	3	1	0	0	Corse2_OUT_3_1_Juve_inde	0	0
1504	zJuve_inde	Juve_inde	CB_juvenile_of_NB_taxa	CA_CB	2	3	Sardinia	OUT	1	1	0	0	Sardinia_OUT_1_1_Juve_inde	0	0
1505	zJuve_inde	Juve_inde	CB_juvenile_of_NB_taxa	CA_CB	2	3	Sardinia	OUT	3	1	0	0	Sardinia_OUT_3_1_Juve_inde	0	0
1506	zJuve_inde	Juve_inde	CB_juvenile_of_NB_taxa	CA_CB	2	3	Sardinia	IN	4	1	0	0	Sardinia_IN_4_1_Juve_inde	0	0
1507	zJuve_inde	Juve_inde	CB_juvenile_of_NB_taxa	CA_CB	2	3	Corse2	IN	3	1	0	0	Corse2_IN_3_1_Juve_inde	0	0
1508	zJuve_inde	Juve_inde	CB_juvenile_of_NB_taxa	CA_CB	2	3	Sardinia	OUT	2	1	0	0	Sardinia_OUT_2_1_Juve_inde	0	0
1509	zJuve_inde	Juve_inde	CB_juvenile_of_NB_taxa	CA_CB	2	3	Corse2	OUT	2	1	1.225	0.33075	Corse2_OUT_2_1_Juve_inde	1.225	0.33075
1510	zJuve_inde	Juve_inde	CB_juvenile_of_NB_taxa	CA_CB	2	3	Spain	IN	4	1	0	0	Spain_IN_4_1_Juve_inde	0	0
1511	zJuve_inde	Juve_inde	CB_juvenile_of_NB_taxa	CA_CB	2	3	Corse2	OUT	1	1	1.05	0.2835	Corse2_OUT_1_1_Juve_inde	1.05	0.2835
1512	zJuve_inde	Juve_inde	CB_juvenile_of_NB_taxa	CA_CB	2	3	Spain	OUT	2	1	0	0	Spain_OUT_2_1_Juve_inde	0	0
